# Supplementary material for: Genome-wide association studies in the Japanese population identify seven novel loci for type 2 diabetes
Source: PubMed Central journal article supplement (PMC4738362; doi:10.1038/ncomms10531), 2016-01-28
Supplement: ncomms10531-s1.pdf [file ncomms10531-s1.pdf]

A

## Stage-1, set-1

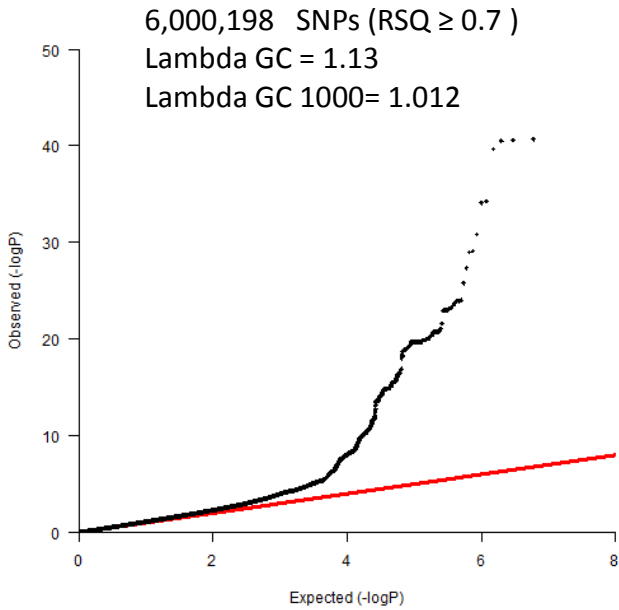

B

## Stage-1, set-2

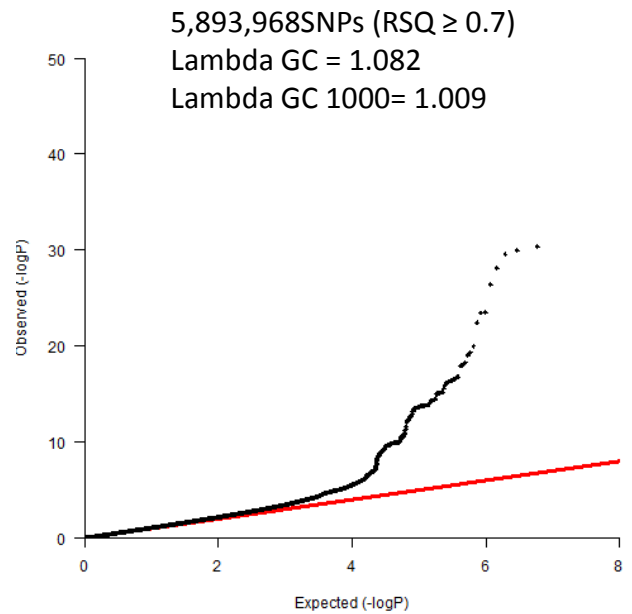

C

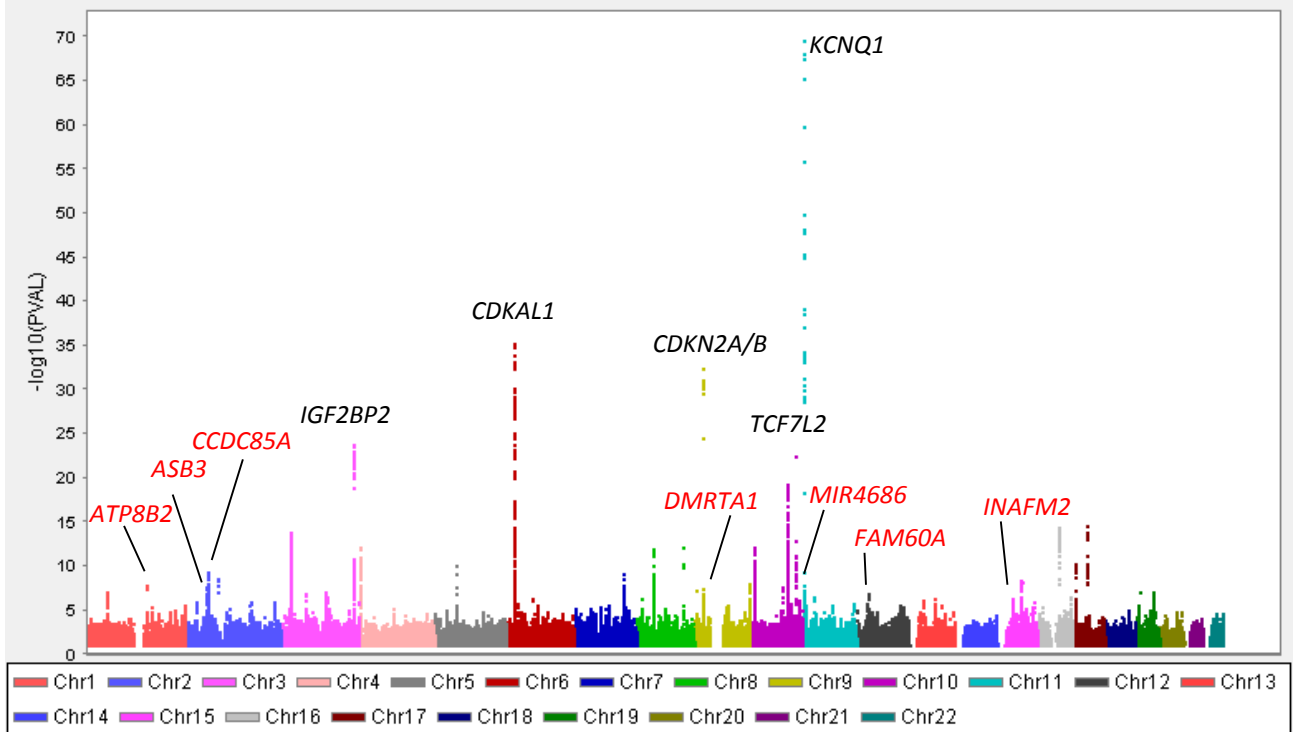

**Supplementary Figure 1. QQ plots and Manhattan plot in the discovery stage.**

**A. QQ plot for the Stage-1, set-1 GWAS.** Association p-values on imputed genotype data for 6,000,198 SNPs (RSQ  $\geq$  0.7) were plotted. **B. QQ plot for the Stage-1, set-2 GWAS.**

Association p-values on imputed genotype data for 5,893,968 SNPs (RSQ  $\geq$  0.7) are plotted. **C. Manhattan plot from the GWAS meta-analysis (set-1 + set-2).** The seven novel loci are indicated in red type.

# Supplementary Figure 2

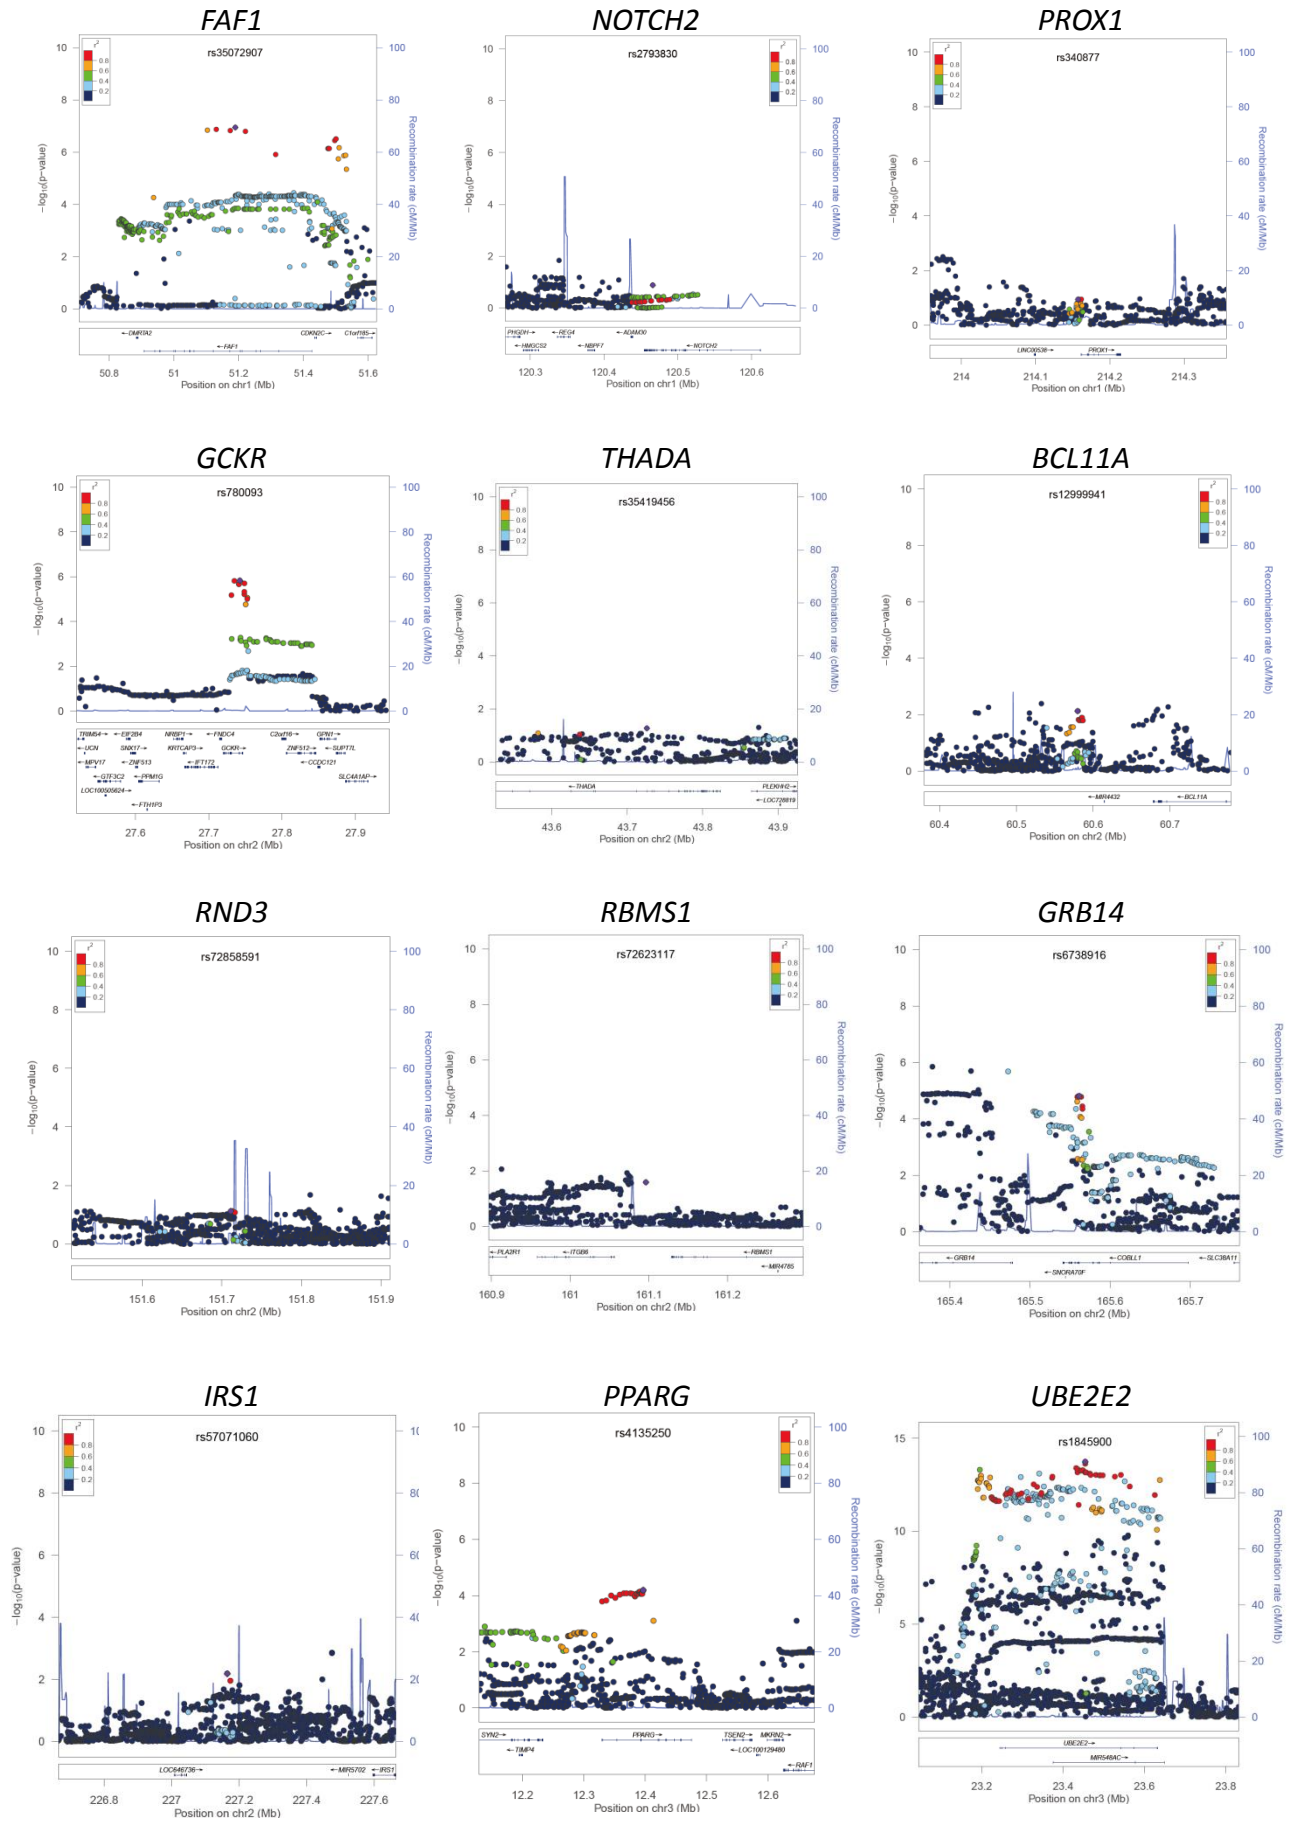

### PSMD6

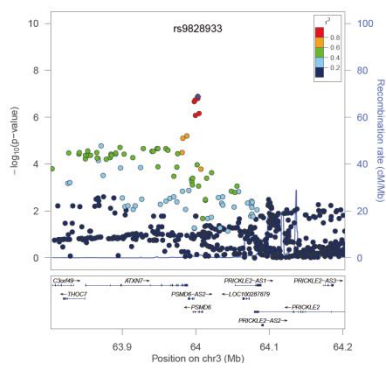

### ADAMTS9

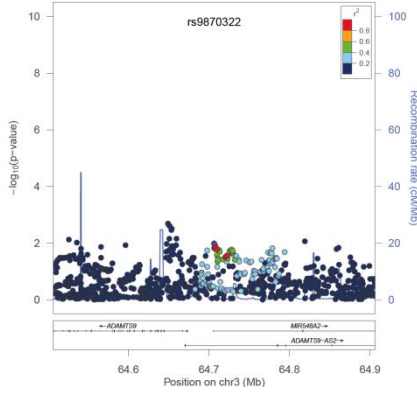

### ADCY5

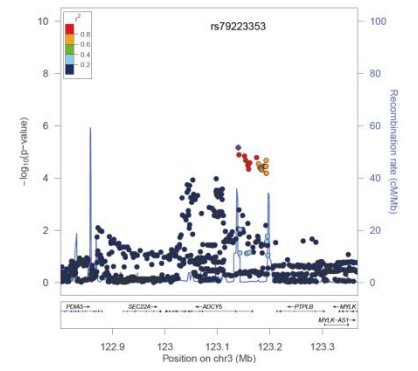

### IGF2BP2

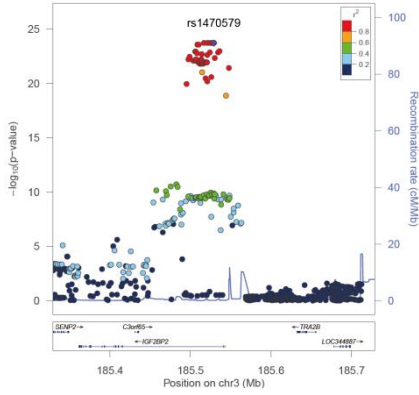

### ST6GAL1

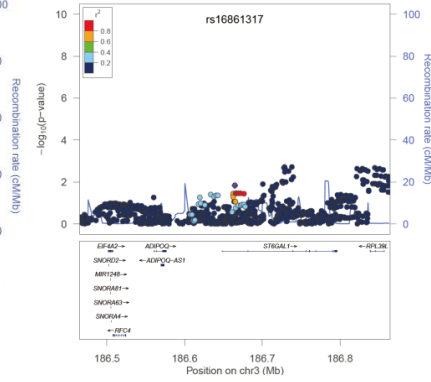

### LPP

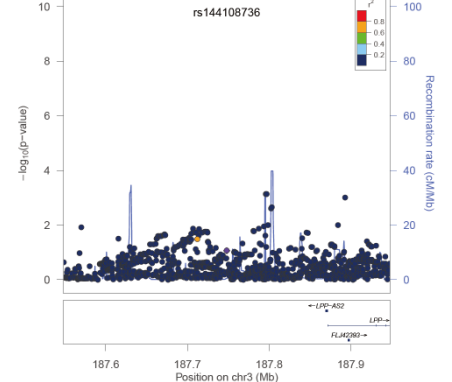

### MAEA

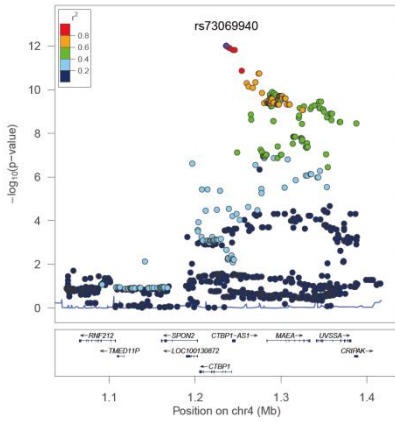

### WFS1

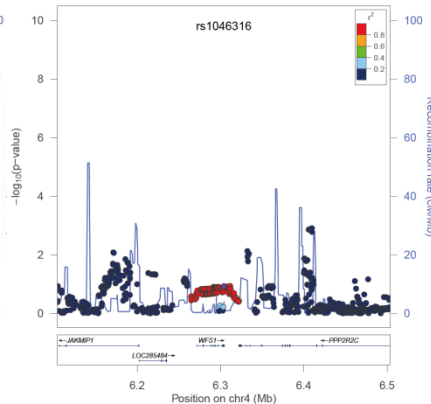

### TMEM154

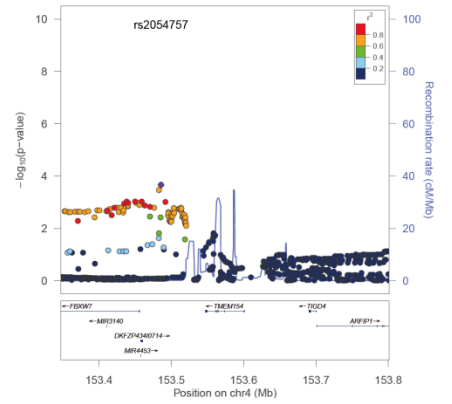

### ARL15

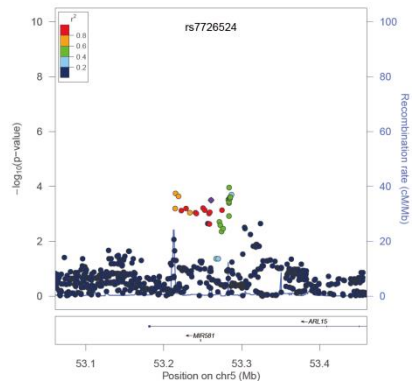

### ANKRD55

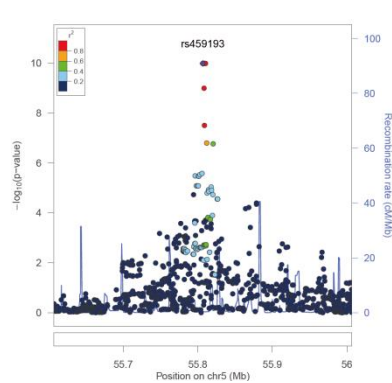

### ZBED3

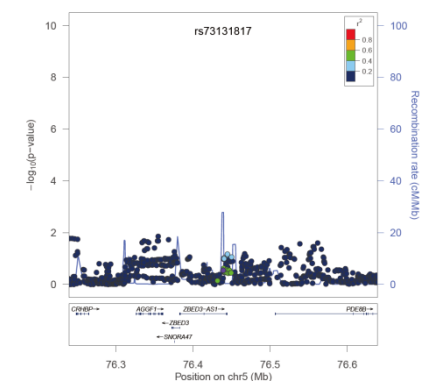





### ZMIZ1

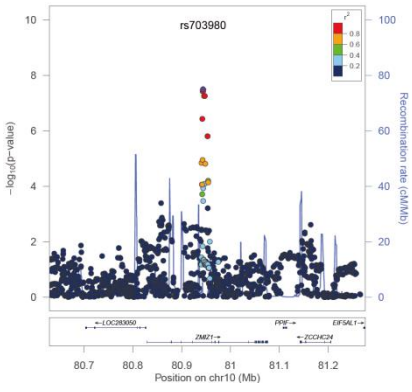

### HHEX/IDE

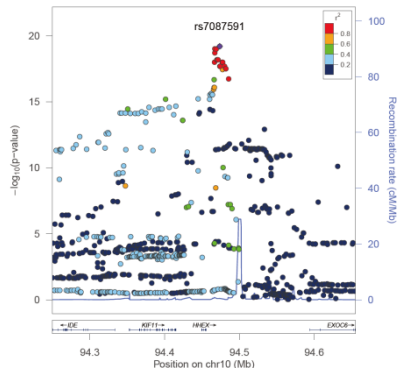

### TCF7L2

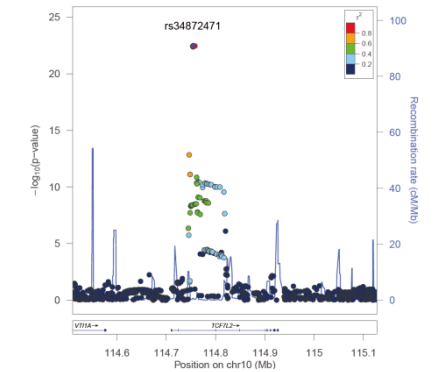

### GRK5

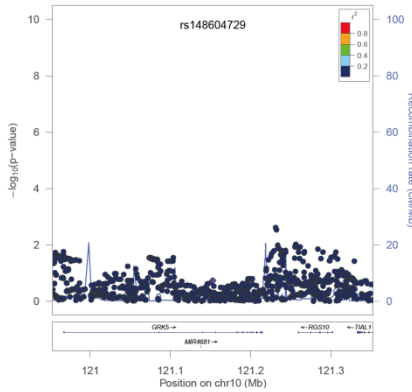

### DUSP8

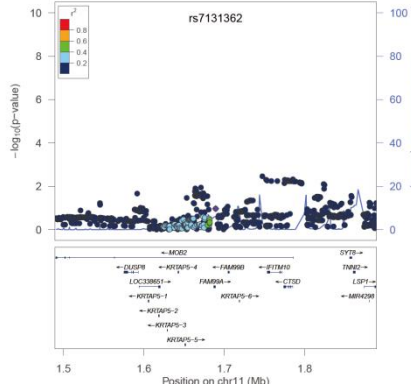

### KCNQ1 (int15)

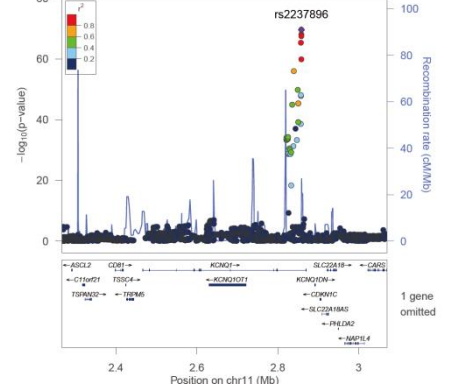

### KCNQ1 (int11)

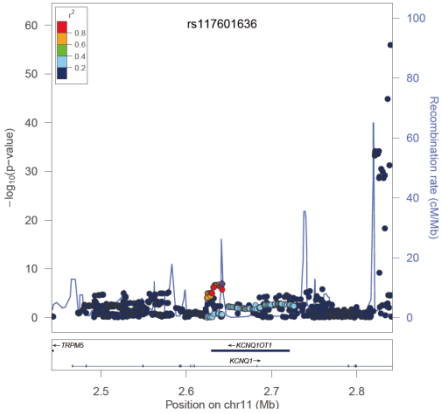

### KCNJ11

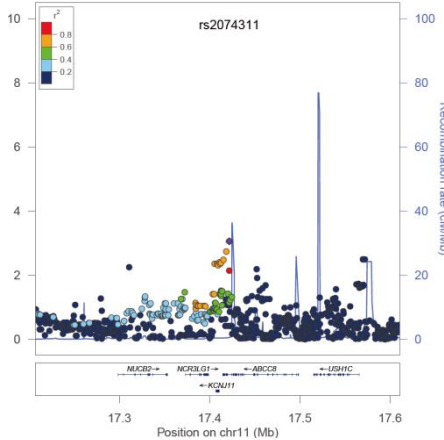

### ARAP1

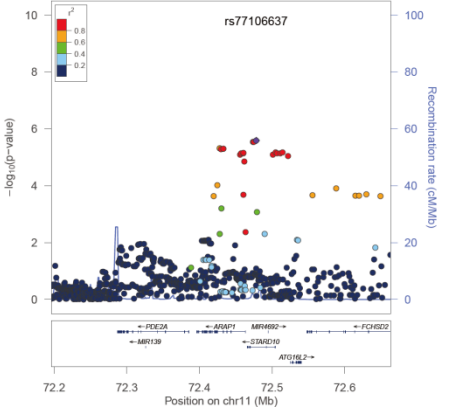

### MTNR1B

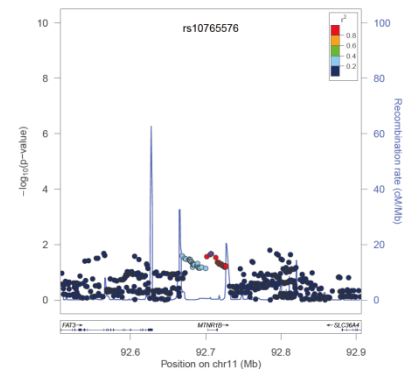

### CCND2

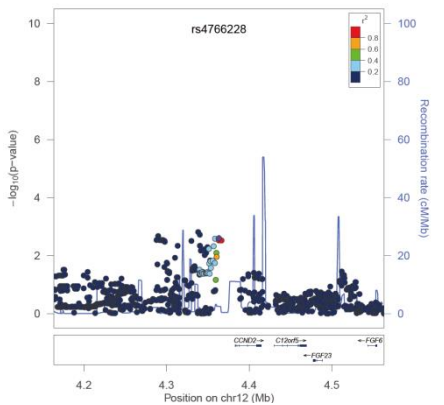

### KLHDC5

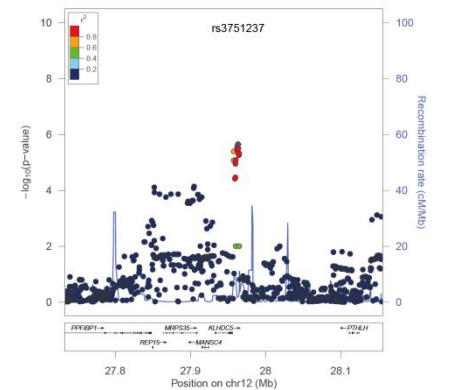

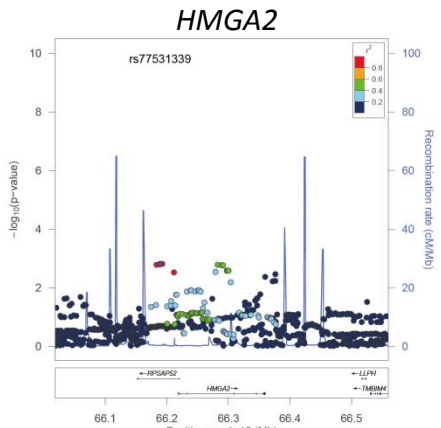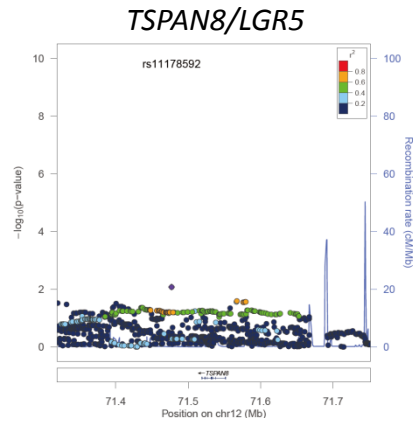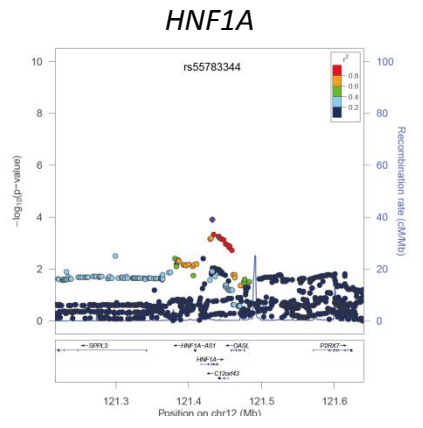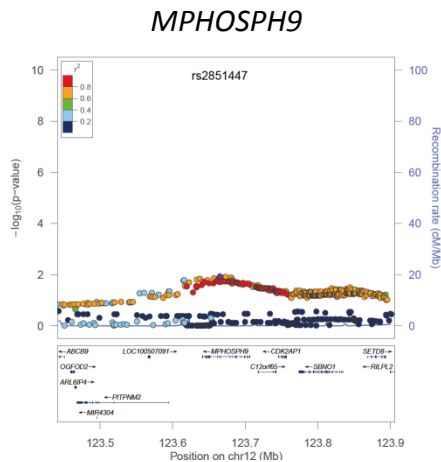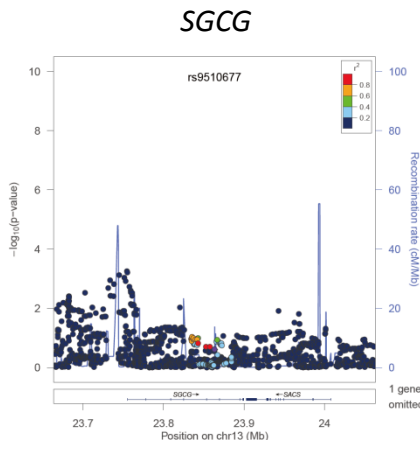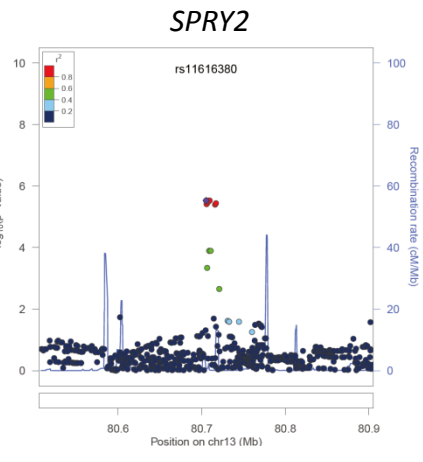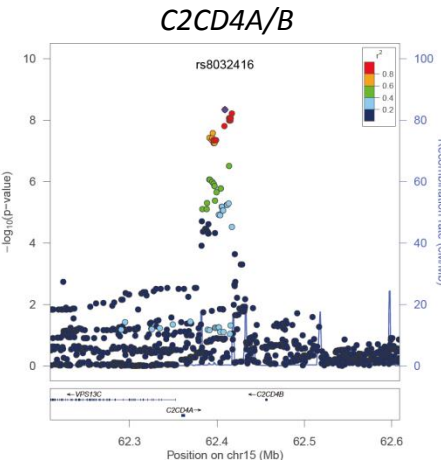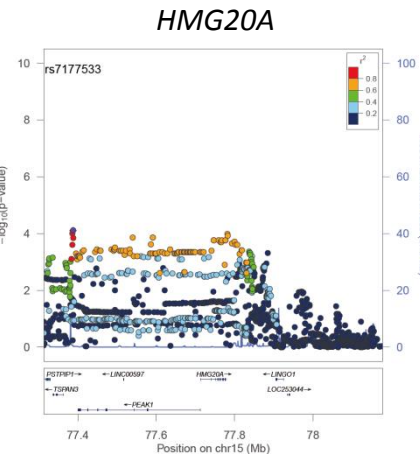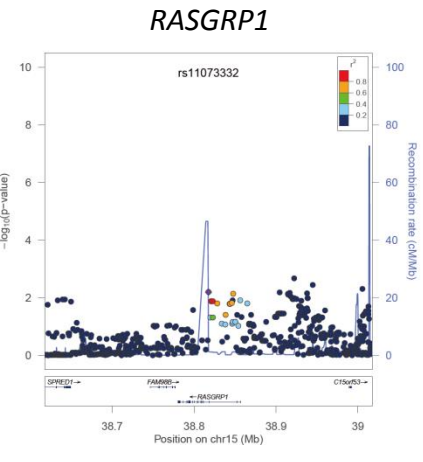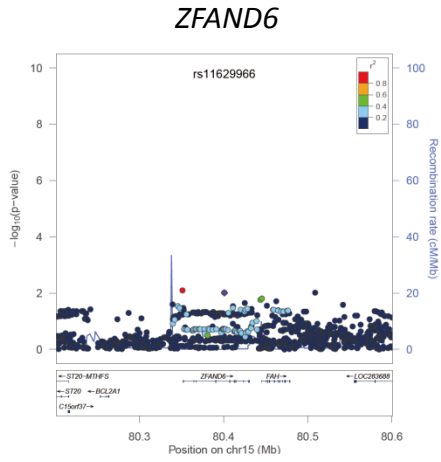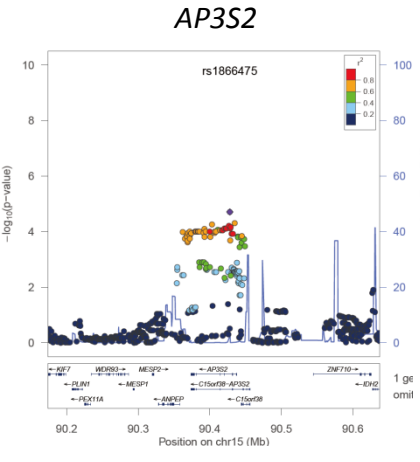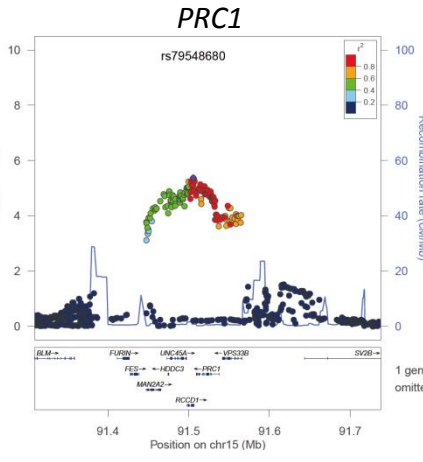

### FTO

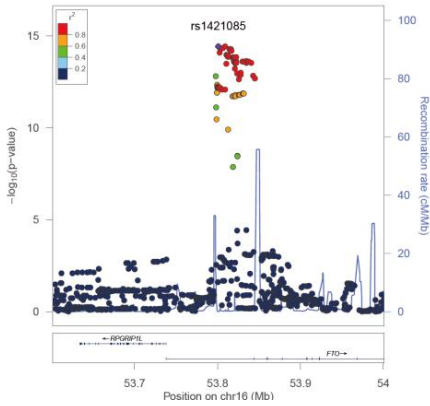

### BCAR1

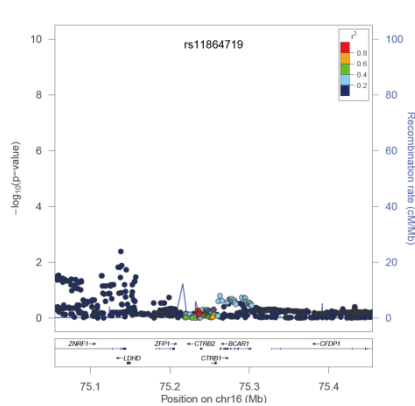

### SRR

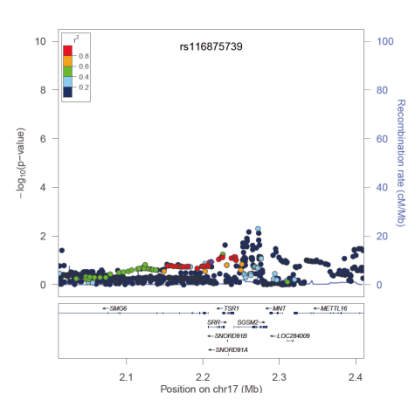

### SLC16A13

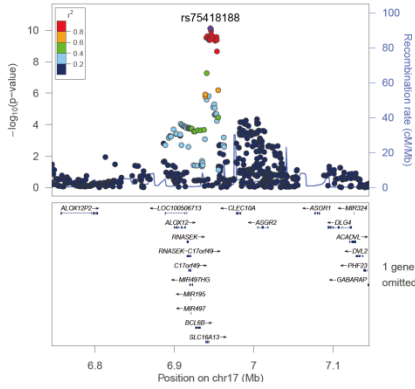

### HNF1B

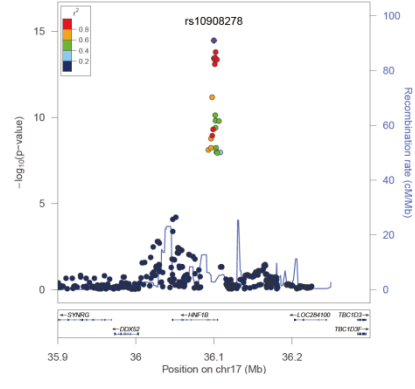

### LAMA-1

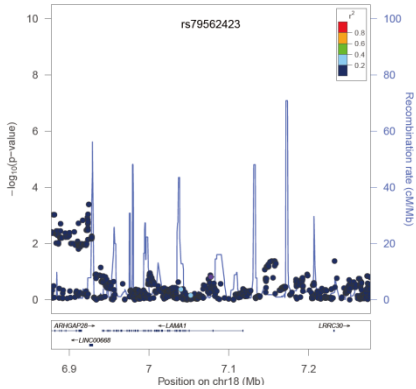

### MC4R

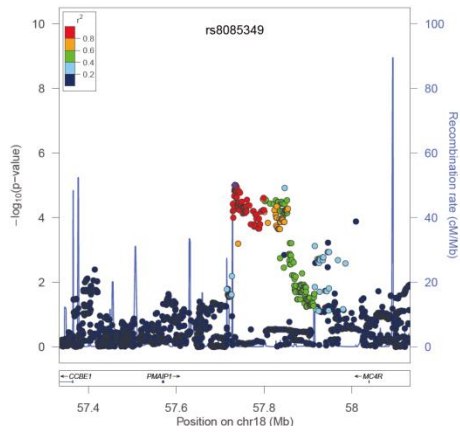

### CILP2

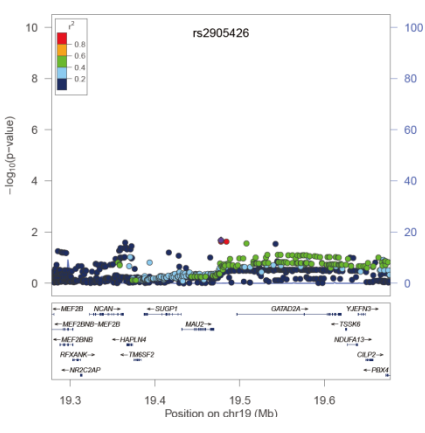

### PEPD

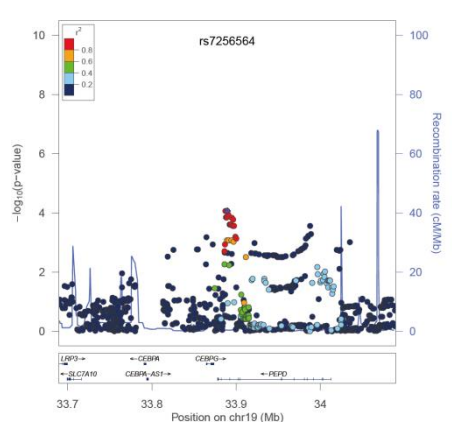

### GIPR

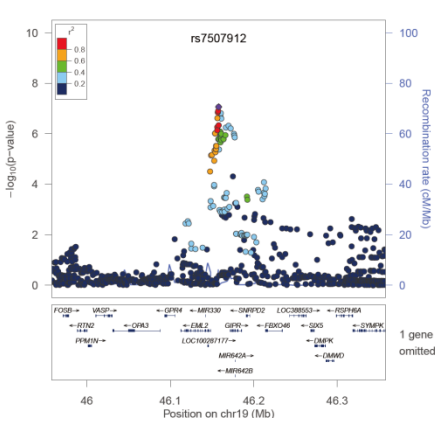

### HNF4A

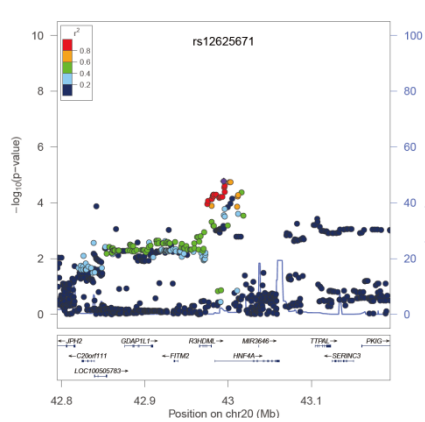



**Supplementary Figure 2. Regional association plots of the discovery stage GWAS meta-analysis (Stage-1: set-1 and set-2) for 83 established T2D susceptibility loci.** Each plot shows  $-\log_{10} P$  values against the chromosomal positions of SNPs in the specific region. The SNP with the strongest association signal (lead SNP) in each locus is represented as a purple diamond; the other SNPs are colored according to the extent of LD with the lead SNP. Estimated recombination rates from the hg19/1000 Genomes Project March 2012 East Asian reference are shown as light-blue lines

# Supplementary Figure 3

A

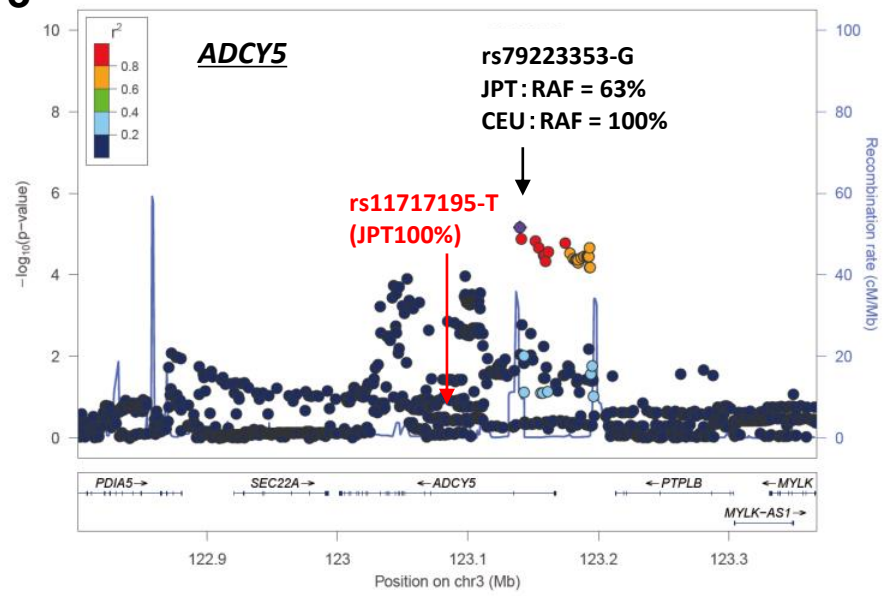

B

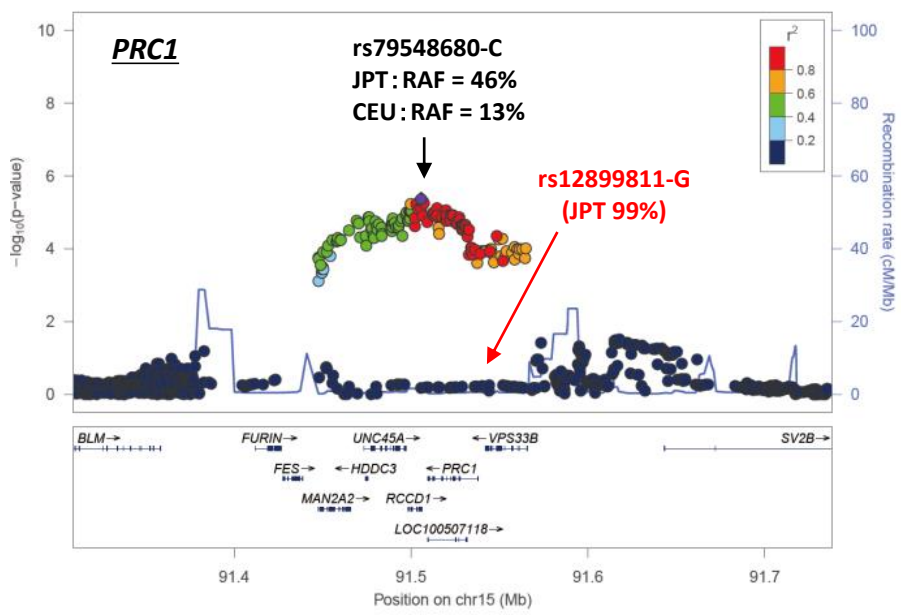

C

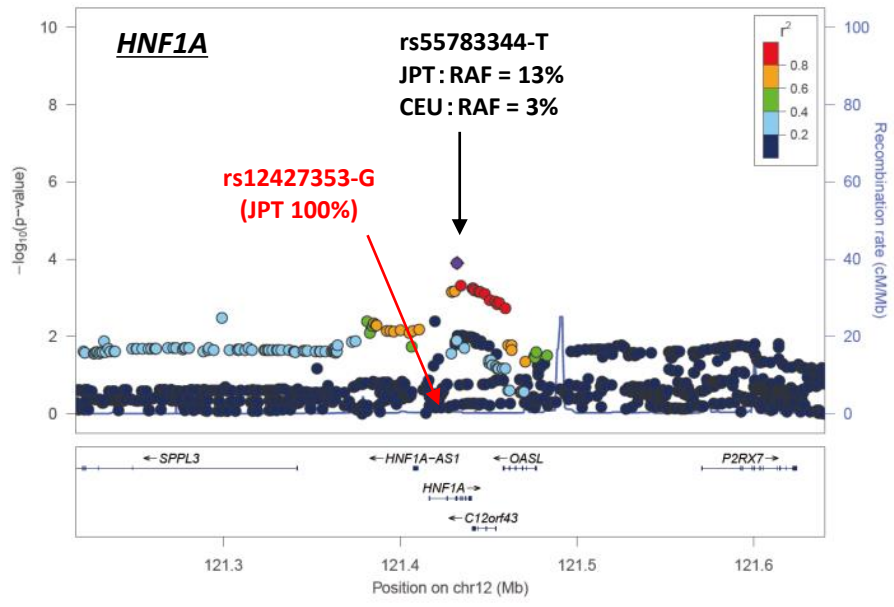

**Supplementary Figure 3. Regional association plots for *ADCY5*, *HNF1A* and *PRC1* in the discovery stage GWAS meta-analysis (Stage-1:set-1 and set-2)** Each plot shows  $-\log_{10} P$  values against the chromosomal positions of SNPs in the specific region. The SNP with the strongest association signal in each locus is represented as a purple diamond; the other SNPs are colored according to the extent of LD with this SNP. Estimated recombination rates from the hg19/1000 Genomes Project March 2012 East Asian reference are shown as light-blue lines.

## Supplementary Figure 4. Genes prioritized by PPI network

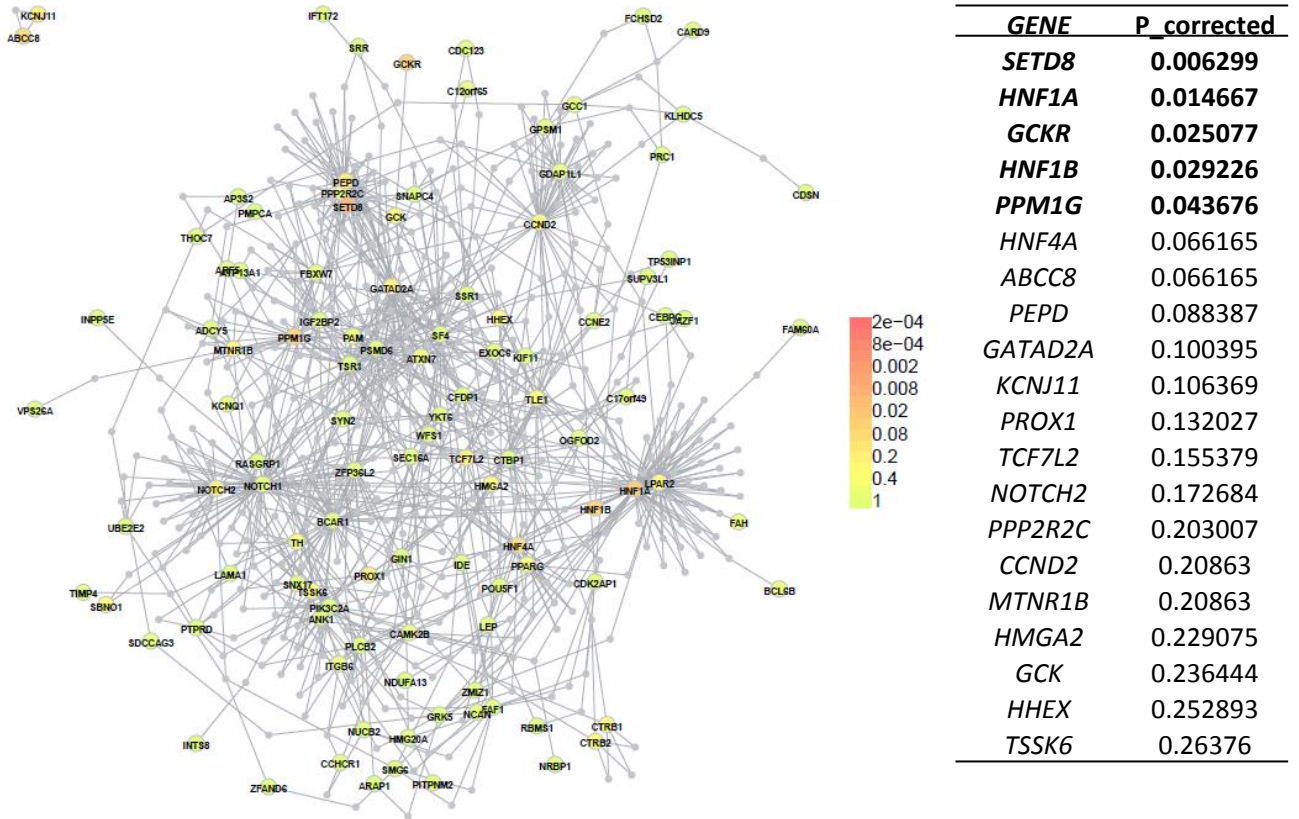

We used DAPPLE ver2.0 (<http://www.broadinstitute.org/mpg/dapple/dappleTMP.php>) to identify genes prioritized by PPI network. We entered 90 T2D regions defined in the supplementary method section ( $\pm 25$  kb or  $r^2 > 0.50$ ) as inputs and defined the number for cutoff of Common Interactor binding degree as 2. We defined the genes with corrected  $p < 0.05$  as PPI network genes.

**A****Biological T2D risk gene prioritization criteria**

- 1) T2D risk missense variant (n = 20)
- 2) Monogenic diabetes (n = 11)
- 3) Protein-protein interaction (n = 5)
- 4) knockout mouse phenotype (n = 46)
- 5) Pubmed text mining (n = 30)
- 6) cis-eQTL (n = 55)

**B**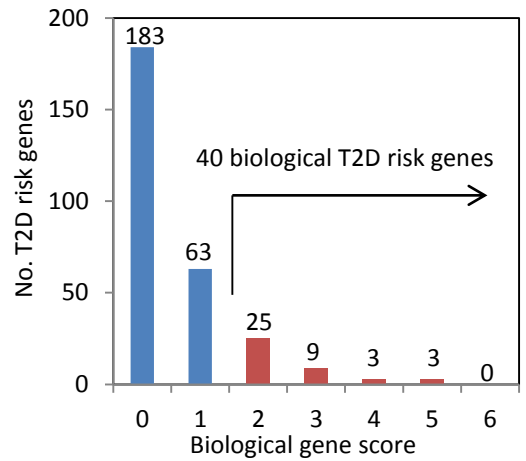**C**

| Correlation of prioritization criteria of biological genes from T2D risk loci ( $R^2$ ) | T2D risk missense variant | Monogenic diabetes | Protein-protein interaction | knockout mouse phenotype | Pubmed text mining | cis-eQTL |
|-----------------------------------------------------------------------------------------|---------------------------|--------------------|-----------------------------|--------------------------|--------------------|----------|
| T2D risk missense variant                                                               | -                         | 0.0531             | 0.0046                      | 0.0045                   | 0.0482             | 0.0016   |
| Monogenic diabetes                                                                      | 0.0531                    | -                  | 0.0629                      | 0.166                    | 0.3414             | 0.0076   |
| Protein-protein interaction                                                             | 0.0046                    | 0.0629             | -                           | 0.0255                   | 0.0465             | 0.005    |
| knockout mouse phenotype                                                                | 0.0045                    | 0.166              | 0.0255                      | -                        | 0.2224             | 0.0223   |
| Pubmed text mining                                                                      | 0.0482                    | 0.3414             | 0.0465                      | 0.2224                   | -                  | 0.0042   |
| cis-eQTL                                                                                | 0.0016                    | 0.0076             | 0.005                       | 0.0223                   | 0.0042             | -        |

**Supplementary Figure 5. Prioritization of biological candidate genes from T2D risk loci.**

**A**, Prioritization criteria of biological candidate genes from T2D risk loci. **B**, Histogram distribution of gene scores. The 40 genes with Score  $\geq 2$  (red) were defined as 'biological T2D risk genes'. **C**, Correlations between every 2 biological candidate gene prioritization criteria.

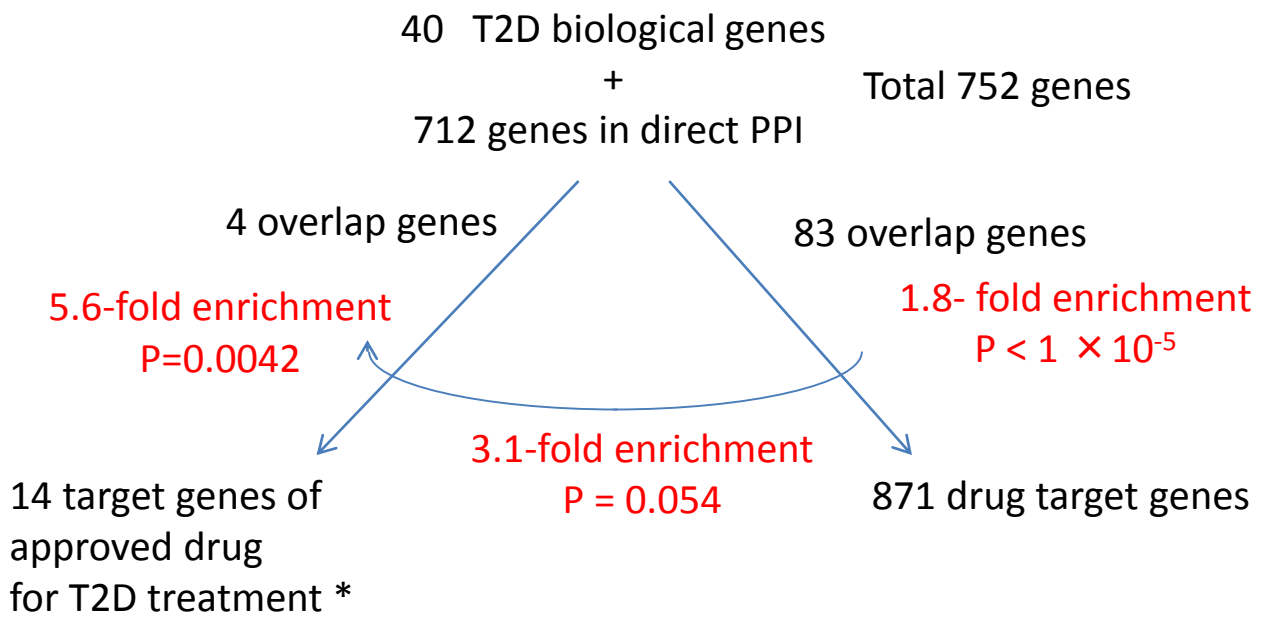

### Supplementary Figure 6. Overlap enrichment analysis

Overlap and relative enrichment between the biological T2D risk genes or genes in direct PPI with the biological T2D risk genes and the drug target genes was assessed by permutation procedure, as previously reported by Okada Y et al (*Nature* **20**, 376-381,2014) .

\* See supplementary Table 22

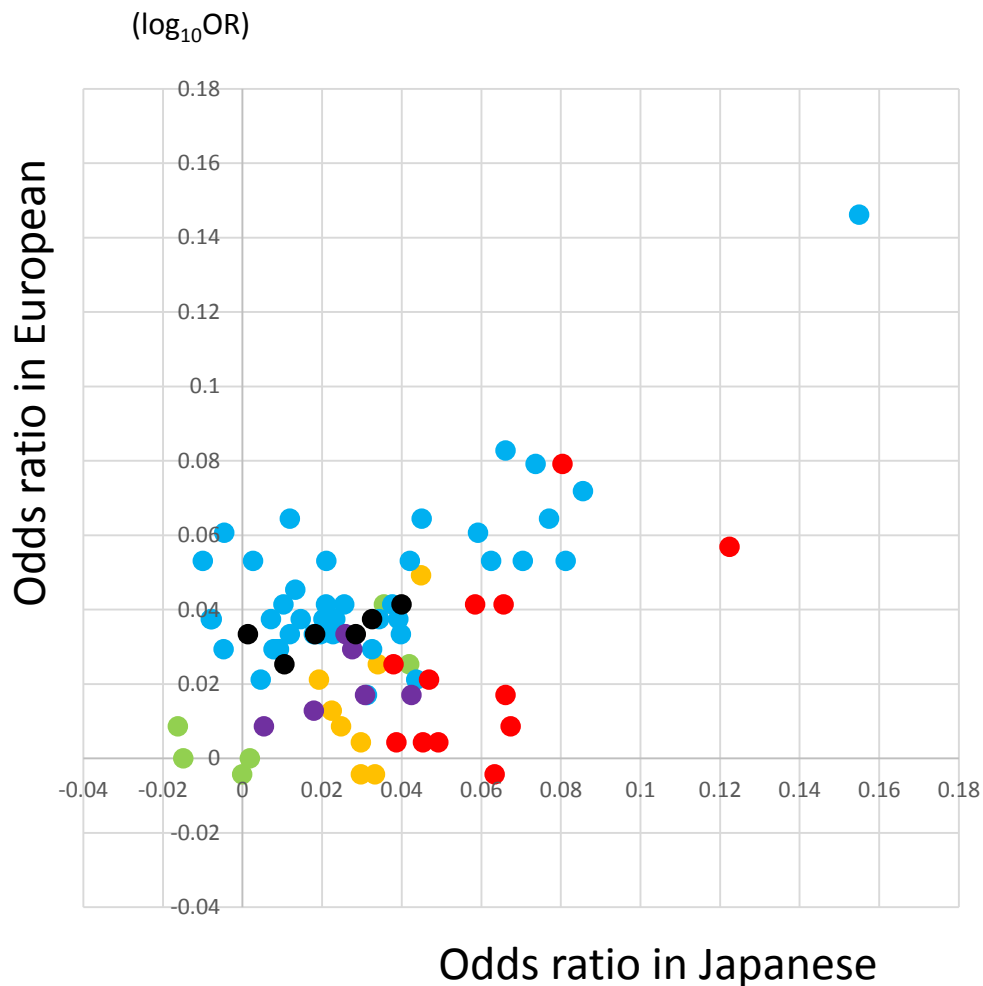

### Populations in original GWAS

- Japanese
- Chinese
- East Asian
- European
- South Asian
- Trans ethnic

| Ethnicity of original study | Effect size |            |
|-----------------------------|-------------|------------|
|                             | JPN > Euro  | JPN < Euro |
| Japanese                    | 12          | 0          |
| Chinese                     | 3           | 3          |
| East Asian                  | 6           | 2          |
| European                    | 11          | 31         |
| South Asian                 | 3           | 3          |
| Trans ethnic                | 0           | 6          |

### Supplementary Figure 7 :Effect sizes for established and novel T2D loci; direct comparison between Japanese and European populations

Effect sizes in Japanese GWAS data (GWAS set1+set2: 14,463 cases and 26, 183 controls) and European data (DIAGRAM3 12,171 cases and 56,862 controls <http://diagram-consortium.org/downloads.html>) are shown across 6 novel and 74 established T2D loci of which both of the Japanese and European association data are available. Lead SNPs in each locus in the population of original reports were selected.

Supplementary Figure 8. Systematic evaluation for effect sizes and LD in 60 loci identified in Japanese or European GWAS

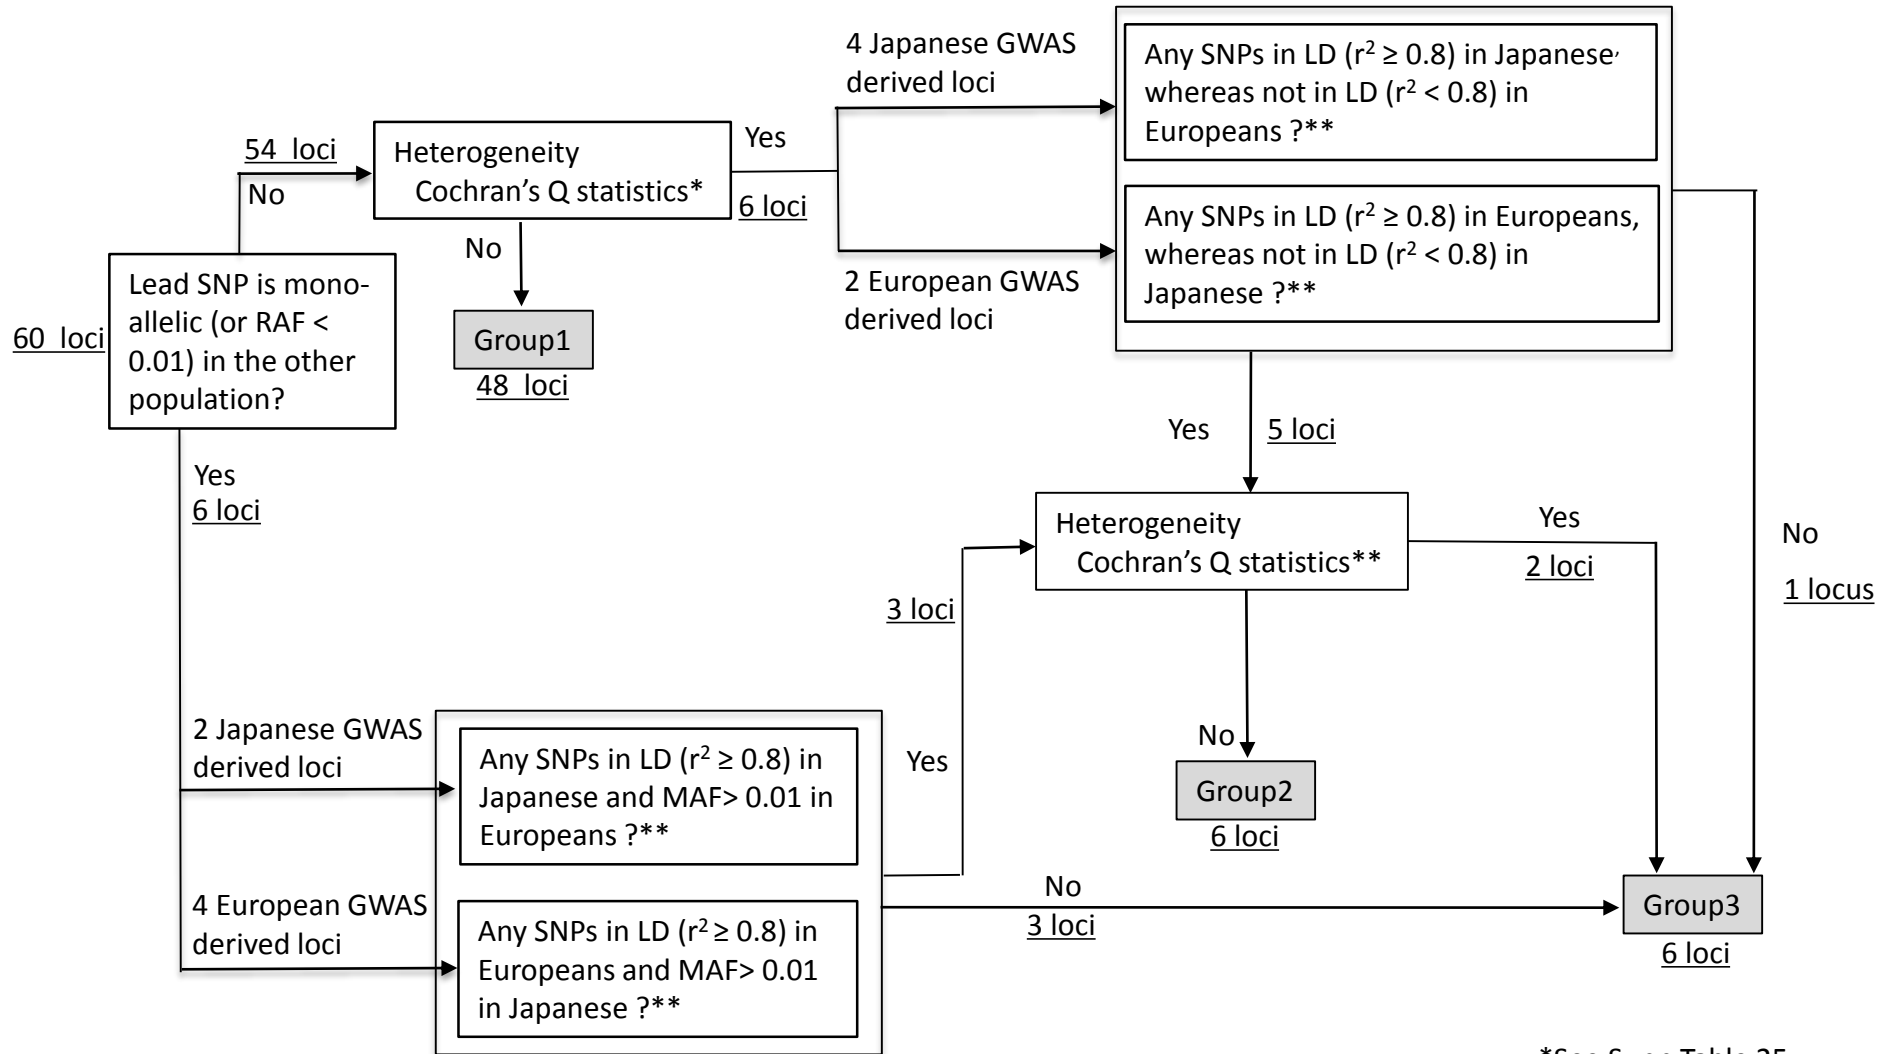

\*See Supp Table 25

\*\*See Supp Table 26



Supplementary Table 1. Twenty-five already established type 2 diabetes SNP loci with  $p < 1 \times 10^{-6}$  in Stage-1 GWAS meta-analysis

| <i>locus</i>             | SNPID<br>for lead SNP | chr | Chr.loc<br>(Build 37 bp) | Risk     | Non Risk | OR   | 95% CI          | P for<br>association | p for<br>hetero |
|--------------------------|-----------------------|-----|--------------------------|----------|----------|------|-----------------|----------------------|-----------------|
| <i>KCNQ1 (intron 15)</i> | rs2237896             | 11  | 2,858,440                | <b>G</b> | A        | 1.33 | ( 1.28 - 1.37 ) | 2.81.E-70            | 0.078           |
| <i>CDKAL1</i>            | rs35612982            | 6   | 20,682,622               | <b>C</b> | T        | 1.21 | ( 1.17 - 1.25 ) | 5.91.E-36            | 0.237           |
| <i>CDKN2A/B</i>          | rs2383208             | 9   | 22,132,076               | <b>A</b> | G        | 1.22 | ( 1.18 - 1.26 ) | 4.88.E-33            | 0.618           |
| <i>IGF2BP2</i>           | rs1470579             | 3   | 185,529,080              | <b>C</b> | A        | 1.18 | ( 1.14 - 1.21 ) | 1.99.E-24            | 0.233           |
| <i>TCF7L2</i>            | rs34872471            | 10  | 114,754,071              | <b>C</b> | T        | 1.43 | ( 1.33 - 1.53 ) | 3.47.E-23            | 0.901           |
| <i>HHEX</i>              | rs7087591             | 10  | 94,473,629               | <b>G</b> | A        | 1.19 | ( 1.14 - 1.23 ) | 6.35.E-20            | 0.612           |
| <i>HNF1B</i>             | rs10908278            | 17  | 36,099,952               | <b>T</b> | A        | 1.14 | ( 1.1 - 1.18 )  | 3.57.E-15            | 0.241           |
| <i>FTO</i>               | rs1421085             | 16  | 53,800,954               | <b>C</b> | T        | 1.16 | ( 1.12 - 1.21 ) | 3.94.E-15            | 0.116           |
| <i>UBE2E2</i>            | rs1845900             | 3   | 23,454,565               | <b>A</b> | G        | 1.18 | ( 1.13 - 1.23 ) | 1.87.E-14            | 0.594           |
| <i>SLC30A8</i>           | rs13266634            | 8   | 118,184,783              | <b>C</b> | T        | 1.12 | ( 1.09 - 1.16 ) | 8.65.E-13            | 0.245           |
| <i>CDC123/CAMK1D</i>     | rs11257655            | 10  | 12,307,894               | <b>T</b> | C        | 1.12 | ( 1.08 - 1.15 ) | 9.65.E-13            | 0.607           |
| <i>MAEA</i>              | rs73069940            | 4   | 1,236,502                | <b>C</b> | G        | 1.13 | ( 1.09 - 1.17 ) | 1.00.E-12            | 0.86            |
| <i>ANK1</i>              | rs12549902            | 8   | 41,509,259               | <b>A</b> | G        | 1.11 | ( 1.08 - 1.15 ) | 1.28.E-12            | 0.669           |
| <i>SLC16A13</i>          | rs75418188            | 17  | 6,945,483                | <b>T</b> | C        | 1.2  | ( 1.13 - 1.27 ) | 7.89.E-11            | 0.9             |
| <i>ANKRD55</i>           | rs459193              | 5   | 55,806,751               | <b>G</b> | A        | 1.11 | ( 1.07 - 1.14 ) | 1.04.E-10            | 0.115           |
| <i>FSCN3-PAX4</i>        | rs806215              | 7   | 127,237,312              | <b>C</b> | T        | 1.11 | ( 1.07 - 1.15 ) | 7.79.E-10            | 0.444           |
| <i>C2CD4A/B</i>          | rs8032416             | 15  | 62,409,070               | <b>G</b> | C        | 1.1  | ( 1.06 - 1.13 ) | 4.58.E-09            | 0.33            |
| <i>GPSM1</i>             | rs28642252            | 9   | 139,245,289              | <b>G</b> | A        | 1.16 | ( 1.1 - 1.22 )  | 1.06.E-08            | 0.416           |
| <i>ZMIZ1</i>             | rs703980              | 10  | 80,943,841               | <b>G</b> | A        | 1.09 | ( 1.06 - 1.12 ) | 3.23.E-08            | 0.139           |
| <i>GLIS3</i>             | rs4258054             | 9   | 4,297,892                | <b>T</b> | C        | 1.1  | ( 1.07 - 1.15 ) | 5.76.E-08            | 0.978           |
| <i>MIR129-LEP</i>        | rs4731420             | 7   | 127,863,295              | <b>C</b> | G        | 1.16 | ( 1.1 - 1.22 )  | 7.90.E-08            | 0.941           |
| <i>GIPR</i>              | rs7507912             | 19  | 46,157,916               | <b>G</b> | A        | 1.11 | ( 1.07 - 1.16 ) | 8.61.E-08            | 0.266           |
| <i>KCNQ1 (intron 11)</i> | rs117601636           | 11  | 2,642,037                | <b>A</b> | G        | 1.16 | ( 1.1 - 1.22 )  | 1.14.E-07            | 0.421           |
| <i>FAF1</i>              | rs35072907            | 1   | 51,189,556               | <b>C</b> | G        | 1.11 | ( 1.07 - 1.15 ) | 1.14.E-07            | 0.055           |
| <i>PSMD6</i>             | rs9828933             | 3   | 63,942,897               | <b>T</b> | C        | 1.09 | ( 1.06 - 1.13 ) | 1.33.E-07            | 0.047           |

Chr:chromosome

Risk: risk allele in the present Japanese study.

non-risk: alternative allele in the present Japanese study.

OR: odds ratio

95%CI: 95% confidence interval

P-for hetero: p-values of Cochran's Q-test for heterogeneity

Supplementary Table 2. Seventeen suggestive SNP loci for type 2 diabetes with  $p < 1 \times 10^{-6}$  in Stage-1 GWAS meta-analysis

| nearby gene     | chr | Chr,loc<br>(Build 37 bp) | SNPID<br>For lead SNP | Risk     | non-risk | OR   | 95% CI          | P-for association | P-for hetero | R <sup>2</sup> |       |
|-----------------|-----|--------------------------|-----------------------|----------|----------|------|-----------------|-------------------|--------------|----------------|-------|
|                 |     |                          |                       |          |          |      |                 |                   |              | set-1          | set-2 |
| <i>CCDC85A</i>  | 2   | 57,287,411               | rs1116357             | <b>G</b> | A        | 1.11 | ( 1.07 - 1.15 ) | 6.88E-10          | 0.68         | 1.00           | 1.00  |
| <i>ATP8B2</i>   | 1   | 154,336,716              | rs67156297            | <b>A</b> | G        | 1.16 | ( 1.1 - 1.23 )  | 1.44E-08          | 0.193        | 0.97           | 0.95  |
| <i>MIR4686</i>  | 11  | 2,196,424                | rs4930045             | <b>T</b> | C        | 1.17 | ( 1.11 - 1.23 ) | 2.08E-08          | 0.734        | 0.78           | 0.76  |
| <i>ASB3</i>     | 2   | 53,397,048               | rs9309245             | <b>G</b> | C        | 1.12 | ( 1.08 - 1.17 ) | 3.23E-08          | 0.407        | 1.00           | 1.00  |
| <i>DMRTA1</i>   | 9   | 22,289,853               | rs12000501            | <b>A</b> | G        | 1.2  | ( 1.13 - 1.29 ) | 4.25E-08          | 0.361        | 0.92           | 0.88  |
| <i>SALL4P5</i>  | 3   | 23,077,761               | rs2688419             | <b>T</b> | C        | 1.1  | ( 1.06 - 1.14 ) | 5.10E-08          | 0.795        | 0.91           | 0.92  |
| <i>FDX1L</i>    | 19  | 10,423,876               | rs187060802           | <b>A</b> | G        | 1.4  | ( 1.24 - 1.58 ) | 8.10E-08          | 1.65E-08     | 0.97           | 0.93  |
| <i>ZBTB20</i>   | 3   | 114,850,836              | rs73230612            | <b>T</b> | C        | 1.09 | ( 1.06 - 1.12 ) | 8.90E-08          | 0.148        | 0.99           | 1.00  |
| <i>FAM60A</i>   | 12  | 31,466,613               | rs147538848           | <b>A</b> | G        | 1.11 | ( 1.07 - 1.16 ) | 1.88E-07          | 0.903        | 0.87           | 0.91  |
| <i>OR2BH1P</i>  | 11  | 29,169,913               | rs1965305             | <b>T</b> | C        | 1.09 | ( 1.05 - 1.12 ) | 3.36E-07          | 0.306        | 0.98           | 0.99  |
| <i>C16orf74</i> | 16  | 85,735,652               | rs377457              | <b>A</b> | G        | 1.09 | ( 1.05 - 1.13 ) | 4.45E-07          | 0.564        | 0.99           | 0.89  |
| <i>MIR4704</i>  | 13  | 66,805,708               | rs4884660             | <b>T</b> | C        | 1.1  | ( 1.06 - 1.14 ) | 4.65E-07          | 0.393        | 0.99           | 0.99  |
| <i>INAFM2</i>   | 15  | 40,619,724               | rs67839313            | <b>C</b> | T        | 1.09 | ( 1.06 - 1.13 ) | 4.79E-07          | 0.572        | 1.00           | 0.88  |
| <i>KIAA1456</i> | 8   | 12,811,580               | rs2946504             | <b>T</b> | G        | 1.08 | ( 1.05 - 1.12 ) | 5.00E-07          | 0.9          | 0.99           | 0.94  |
| <i>ADH5P4</i>   | 6   | 66,618,657               | rs79976124            | <b>A</b> | G        | 1.18 | ( 1.1 - 1.26 )  | 5.45E-07          | 4.03E-04     | 0.95           | 0.98  |
| <i>RPL19P16</i> | 10  | 122,849,667              | rs35668226            | <b>A</b> | G        | 1.1  | ( 1.06 - 1.14 ) | 9.86E-07          | 0.111        | 0.96           | 0.98  |
| <i>TOMM22P3</i> | 13  | 33,556,228               | rs56252704            | <b>A</b> | G        | 1.11 | ( 1.07 - 1.16 ) | 9.95E-07          | 0.264        | 0.98           | 0.96  |

Chr: chromosome

Risk: risk allele in the present Japanese study.

non-risk: alternative allele in the present Japanese study.

OR: odds ratio

95%CI: 95% confidence interval

P-for hetero: p-values of Cochran's Q-test for heterogeneity

R<sup>2</sup>: r-square value for imputation accuracy

Supplementary Table 3. Association data of 17 suggestive loci for type 2 diabetes in Stage1+2 meta-analysis

| nearby gene     | Chr. | SNP ID         | Allele |          | Risk Allele     |        |         | Association for type 2 diabetes |             |                        |           | Meta analysis    |                  |
|-----------------|------|----------------|--------|----------|-----------------|--------|---------|---------------------------------|-------------|------------------------|-----------|------------------|------------------|
|                 |      |                | Risk   | Non-risk | Study           | Case   | Control | R <sup>2</sup>                  | OR          | 95%CI                  | P value   | p-for associatio | p-for hetero     |
| <i>CCDC85A</i>  | 2    | rs11116357     | G      | A        | Stage-1, set-1  | 0.292  | 0.269   | 0.9999                          | 1.12        | ( 1.07 - 1.17 )        | 6.55.E-06 | <b>6.97.E-10</b> | <b>0.21</b>      |
|                 |      |                |        |          | Stage-1, set-2  | 0.299  | 0.279   | 0.9996                          | 1.10        | ( 1.05 - 1.15 )        | 2.61.E-05 |                  |                  |
|                 |      |                |        |          | Stage-2         | 0.294  | 0.284   |                                 | 1.05        | ( 0.99 - 1.11 )        | 8.65.E-02 |                  |                  |
|                 |      |                |        |          | <b>combined</b> |        |         |                                 | <b>1.09</b> | <b>( 1.06 - 1.12 )</b> |           |                  |                  |
| <i>FAM60A</i>   | 12   | rs147538848    | A      | G        | Stage-1, set-1  | 0.205  | 0.19    | 0.867                           | 1.11        | ( 1.05 - 1.18 )        | 5.81.E-04 | <b>7.83.E-10</b> | <b>0.99</b>      |
|                 |      |                |        |          | Stage-1, set-2  | 0.199  | 0.184   | 0.912                           | 1.12        | ( 1.06 - 1.18 )        | 1.15.E-04 |                  |                  |
|                 |      |                |        |          | Stage-2         | 0.21   | 0.193   |                                 | 1.11        | ( 1.04 - 1.18 )        | 1.10.E-03 |                  |                  |
|                 |      |                |        |          | <b>combined</b> |        |         |                                 | <b>1.11</b> | <b>( 1.07 - 1.15 )</b> |           |                  |                  |
| <i>DMRTA1</i>   | 9    | rs1575972 *    | T      | A        | Stage-1, set-1  | 0.947  | 0.935   | 0.979                           | 1.24        | ( 1.13 - 1.36 )        | 8.64.E-06 | <b>1.50.E-09</b> | <b>0.62</b>      |
|                 |      |                |        |          | Stage-1, set-2  | 0.943  | 0.935   | 0.883                           | 1.17        | ( 1.07 - 1.29 )        | 1.13.E-03 |                  |                  |
|                 |      |                |        |          | Stage-2         | 0.95   | 0.942   |                                 | 1.16        | ( 1.04 - 1.29 )        | 7.60.E-03 |                  |                  |
|                 |      |                |        |          | <b>combined</b> |        |         |                                 | <b>1.19</b> | <b>( 1.13 - 1.26 )</b> |           |                  |                  |
| <i>ASB3</i>     | 2    | rs9309245      | G      | C        | Stage-1, set-1  | 0.178  | 0.164   | 0.997                           | 1.10        | ( 1.04 - 1.17 )        | 1.57.E-03 | <b>1.25.E-08</b> | <b>0.30</b>      |
|                 |      |                |        |          | Stage-1, set-2  | 0.186  | 0.168   | 0.998                           | 1.14        | ( 1.08 - 1.20 )        | 3.43.E-06 |                  |                  |
|                 |      |                |        |          | Stage-2         | 0.181  | 0.172   |                                 | 1.06        | ( 0.998 - 1.14 )       | 5.95.E-02 |                  |                  |
|                 |      |                |        |          | <b>combined</b> |        |         |                                 | <b>1.10</b> | <b>( 1.07 - 1.14 )</b> |           |                  |                  |
| <i>ATP8B2</i>   | 1    | rs67156297     | A      | G        | Stage-1, set-1  | 0.102  | 0.086   | 0.966                           | 1.21        | ( 1.12 - 1.30 )        | 1.28.E-06 | <b>1.95.E-08</b> | <b>0.10</b>      |
|                 |      |                |        |          | Stage-1, set-2  | 0.097  | 0.087   | 0.955                           | 1.13        | ( 1.05 - 1.21 )        | 1.34.E-03 |                  |                  |
|                 |      |                |        |          | Stage-2         | 0.092  | 0.087   |                                 | 1.07        | ( 0.98 - 1.16 )        | 1.33.E-01 |                  |                  |
|                 |      |                |        |          | <b>combined</b> |        |         |                                 | <b>1.14</b> | <b>( 1.09 - 1.19 )</b> |           |                  |                  |
| <i>MIR4686</i>  | 11   | rs7107784 *    | G      | A        | Stage-1, set-1  | 0.099  | 0.089   | 0.833                           | 1.16        | ( 1.07 - 1.26 )        | 4.91.E-04 | <b>2.07.E-08</b> | <b>0.42</b>      |
|                 |      |                |        |          | Stage-1, set-2  | 0.101  | 0.09    | 0.821                           | 1.18        | ( 1.09 - 1.27 )        | 3.88.E-05 |                  |                  |
|                 |      |                |        |          | Stage-2         | 0.093  | 0.086   |                                 | 1.09        | ( 0.998 - 1.19 )       | 5.58.E-02 |                  |                  |
|                 |      |                |        |          | <b>combined</b> |        |         |                                 | <b>1.14</b> | <b>( 1.09 - 1.20 )</b> |           |                  |                  |
| <i>INAFM2</i>   | 15   | rs67839313     | C      | T        | Stage-1, set-1  | 0.28   | 0.261   | 0.999                           | 1.10        | ( 1.05 - 1.16 )        | 7.87.E-05 | <b>2.42.E-08</b> | <b>0.73</b>      |
|                 |      |                |        |          | Stage-1, set-2  | 0.278  | 0.264   | 0.883                           | 1.08        | ( 1.03 - 1.14 )        | 1.75.E-03 |                  |                  |
|                 |      |                |        |          | Stage-2         | 0.281  | 0.267   |                                 | 1.07        | ( 1.01 - 1.13 )        | 1.36.E-02 |                  |                  |
|                 |      |                |        |          | <b>combined</b> |        |         |                                 | <b>1.09</b> | <b>( 1.06 - 1.12 )</b> |           |                  |                  |
| <i>RPL19P16</i> | 10   | rs35668226     | A      | G        | Stage-1, set-1  | 0.805  | 0.795   | 0.962                           | 1.07        | ( 1.01 - 1.13 )        | 2.55.E-02 | <b>2.67.E-07</b> | <b>0.18</b>      |
|                 |      |                |        |          | Stage-1, set-2  | 0.812  | 0.792   | 0.977                           | 1.13        | ( 1.07 - 1.19 )        | 4.15.E-06 |                  |                  |
|                 |      |                |        |          | Stage-2         | 0.814  | 0.805   |                                 | 1.06        | ( 0.996 - 1.13 )       | 6.43.E-02 |                  |                  |
|                 |      |                |        |          | <b>combined</b> |        |         |                                 | <b>1.09</b> | <b>( 1.05 - 1.13 )</b> |           |                  |                  |
| <i>C16orf74</i> | 16   | rs377457       | A      | G        | Stage-1, set-1  | 0.708  | 0.687   | 0.987                           | 1.10        | ( 1.05 - 1.15 )        | 7.48.E-05 | <b>6.11.E-07</b> | <b>0.25</b>      |
|                 |      |                |        |          | Stage-1, set-2  | 0.711  | 0.697   | 0.894                           | 1.08        | ( 1.03 - 1.13 )        | 1.93.E-03 |                  |                  |
|                 |      |                |        |          | Stage-2         | 0.705  | 0.697   |                                 | 1.04        | ( 0.98 - 1.10 )        | 1.80.E-01 |                  |                  |
|                 |      |                |        |          | <b>combined</b> |        |         |                                 | <b>1.08</b> | <b>( 1.05 - 1.11 )</b> |           |                  |                  |
| <i>ADH5P4</i>   | 6    | rs79976124     | A      | G        | Stage-1, set-1  | 0.068  | 0.053   | 0.953                           | 1.34        | ( 1.22 - 1.48 )        | 1.53.E-09 | <b>1.78.E-06</b> | <b>3.68.E-04</b> |
|                 |      |                |        |          | Stage-1, set-2  | 0.066  | 0.063   | 0.976                           | 1.06        | ( 0.97 - 1.16 )        | 1.70.E-01 |                  |                  |
|                 |      |                |        |          | Stage-2         | 0.066  | 0.062   |                                 | 1.05        | ( 0.95 - 1.17 )        | 3.17.E-01 |                  |                  |
|                 |      |                |        |          | <b>combined</b> |        |         |                                 | <b>1.14</b> | <b>( 1.08 - 1.21 )</b> |           |                  |                  |
| <i>ZBTB20</i>   | 3    | rs73230612     | T      | C        | Stage-1, set-1  | 0.644  | 0.631   | 0.99                            | 1.06        | ( 1.02 - 1.11 )        | 9.63.E-03 | <b>3.25.E-06</b> | <b>0.01</b>      |
|                 |      |                |        |          | Stage-1, set-2  | 0.658  | 0.634   | 0.999                           | 1.11        | ( 1.07 - 1.16 )        | 1.86.E-06 |                  |                  |
|                 |      |                |        |          | Stage-2         | 0.642  | 0.642   |                                 | 1.003       | ( 0.95 - 1.06 )        | 9.01.E-01 |                  |                  |
|                 |      |                |        |          | <b>combined</b> |        |         |                                 | <b>1.07</b> | <b>( 1.04 - 1.09 )</b> |           |                  |                  |
| <i>KIAA1456</i> | 8    | rs2946504      | T      | G        | Stage-1, set-1  | 0.413  | 0.393   | 0.986                           | 1.09        | ( 1.04 - 1.14 )        | 3.68.E-04 | <b>3.97.E-06</b> | <b>0.11</b>      |
|                 |      |                |        |          | Stage-1, set-2  | 0.418  | 0.401   | 0.938                           | 1.08        | ( 1.04 - 1.13 )        | 5.54.E-04 |                  |                  |
|                 |      |                |        |          | Stage-2         | 0.397  | 0.393   |                                 | 1.02        | ( 0.97 - 1.07 )        | 5.39.E-01 |                  |                  |
|                 |      |                |        |          | <b>combined</b> |        |         |                                 | <b>1.06</b> | <b>( 1.04 - 1.09 )</b> |           |                  |                  |
| <i>SALL4P5</i>  | 3    | rs2688419      | T      | C        | Stage-1, set-1  | 0.667  | 0.647   | 0.914                           | 1.10        | ( 1.05 - 1.16 )        | 5.43.E-05 | <b>4.74.E-06</b> | <b>0.01</b>      |
|                 |      |                |        |          | Stage-1, set-2  | 0.671  | 0.652   | 0.923                           | 1.09        | ( 1.04 - 1.15 )        | 1.32.E-04 |                  |                  |
|                 |      |                |        |          | Stage-2         | 0.662  | 0.662   |                                 | 1.0001      | ( 0.95 - 1.05 )        | 9.97.E-01 |                  |                  |
|                 |      |                |        |          | <b>combined</b> |        |         |                                 | <b>1.07</b> | <b>( 1.04 - 1.10 )</b> |           |                  |                  |
| <i>OR2BH1P</i>  | 11   | rs2933170 *    | A      | G        | Stage-1, set-1  | 0.677  | 0.662   | 0.9999                          | 1.07        | ( 1.02 - 1.12 )        | 5.29.E-03 | <b>9.83.E-06</b> | <b>0.031</b>     |
|                 |      |                |        |          | Stage-1, set-2  | 0.695  | 0.674   | 0.9998                          | 1.11        | ( 1.06 - 1.16 )        | 1.47.E-05 |                  |                  |
|                 |      |                |        |          | Stage-2         | 0.683  | 0.682   |                                 | 1.01        | ( 0.95 - 1.06 )        | 8.35.E-01 |                  |                  |
|                 |      |                |        |          | <b>combined</b> |        |         |                                 | <b>1.06</b> | <b>( 1.04 - 1.09 )</b> |           |                  |                  |
| <i>FDX1L</i>    | 19   | rs187060802 ** | A      | G        | Stage-1, set-1  | 0.022  | 0.010   | 0.973                           | 2.17        | ( 1.79 - 2.64 )        | 2.46.E-16 | N/A              | N/A              |
|                 |      |                |        |          | Stage-1, set-2  | 0.020  | 0.019   | 0.931                           | 1.05        | ( 0.90 - 1.23 )        | 5.09.E-01 |                  |                  |
|                 |      |                |        |          | Stage-2         | failed |         |                                 |             |                        |           |                  |                  |
| <i>MIR4704</i>  | 13   | rs4884660 **   | T      | C        | Stage-1, set-1  | 0.225  | 0.206   | 0.991                           | 1.12        | ( 1.06 - 1.18 )        | 4.43.E-05 | N/A              | N/A              |
|                 |      |                |        |          | Stage-1, set-2  | 0.227  | 0.214   | 0.991                           | 1.08        | ( 1.03 - 1.14 )        | 2.15.E-03 |                  |                  |
|                 |      |                |        |          | Stage-2         | failed |         |                                 |             |                        |           |                  |                  |
| <i>TOMM22P3</i> | 13   | rs56252704 **  | A      | G        | Stage-1, set-1  | 0.149  | 0.139   | 0.982                           | 1.08        | ( 1.02 - 1.15 )        | 1.14.E-02 | N/A              | N/A              |
|                 |      |                |        |          | Stage-1, set-2  | 0.155  | 0.140   | 0.963                           | 1.14        | ( 1.07 - 1.21 )        | 2.15.E-05 |                  |                  |
|                 |      |                |        |          | Stage-2         | failed |         |                                 |             |                        |           |                  |                  |

Chr:chromosome

Risk: risk allele in the present Japanese study.

non-risk: alternative allele in the present Japanese study.

R<sup>2</sup>: r-square value for the imputation accuracy

OR: odds ratio

95%CI: 95% confidence interval

P-for hetero: p-values of Cochran's Q-test for heterogeneity

\* proxy SNPs for the lead SNPs at Stage-1 GWAS meta-analysis

(rs1575972: proxy for rs12000501 *JPT* r<sup>2</sup> = 0.86, rs7107784: proxy for rs4930045 *JPT* r<sup>2</sup> = 0.86, rs2933170: proxy for rs1965305 *JPT* r<sup>2</sup> = 0.98)\*\* *de novo* typing was not successful

Supplementary Table 4. Association data of 7 novel type 2 diabetes susceptible loci with adjustment for age, sex and BMI

| nearby gene    | Chr. | SNP ID      | Allele   |          | Study           | Risk Allele |         | R <sup>2</sup> | Association for type 2 diabetes |                        |           | Meta analysis     |              |
|----------------|------|-------------|----------|----------|-----------------|-------------|---------|----------------|---------------------------------|------------------------|-----------|-------------------|--------------|
|                |      |             | Risk     | Non-risk |                 | Case        | Control |                | OR                              | 95%CI                  | P value   | p-for association | p-for hetero |
| <b>CCDC85A</b> | 2    | rs1116357   | <b>G</b> | A        | Stage-1, set-1  | 0.292       | 0.271   | 1              | 1.09                            | ( 1.03 - 1.15 )        | 2.14.E-03 | <b>6.03.E-07</b>  | <b>0.148</b> |
|                |      |             |          |          | Stage-1, set-2  | 0.300       | 0.278   | 1              | 1.11                            | ( 1.06 - 1.16 )        | 2.03.E-05 |                   |              |
|                |      |             |          |          | Stage-2         | 0.291       | 0.283   |                | 1.03                            | ( 0.97 - 1.09 )        | 3.95.E-01 |                   |              |
|                |      |             |          |          | <b>combined</b> |             |         |                | <b>1.08</b>                     | <b>( 1.05 - 1.12 )</b> |           |                   |              |
| <b>FAM60A</b>  | 12   | rs147538848 | <b>A</b> | G        | Stage-1, set-1  | 0.205       | 0.192   | 0.867          | 1.11                            | ( 1.04 - 1.19 )        | 1.89.E-03 | <b>6.73E-11</b>   | <b>0.668</b> |
|                |      |             |          |          | Stage-1, set-2  | 0.199       | 0.184   | 0.912          | 1.13                            | ( 1.07 - 1.19 )        | 4.66.E-05 |                   |              |
|                |      |             |          |          | Stage-2         | 0.209       | 0.193   |                | 1.16                            | ( 1.08 - 1.24 )        | 3.88.E-05 |                   |              |
|                |      |             |          |          | <b>combined</b> |             |         |                | <b>1.13</b>                     | <b>( 1.09 - 1.17 )</b> |           |                   |              |
| <b>DMRTA1</b>  | 9    | rs1575972   | <b>T</b> | A        | Stage-1, set-1  | 0.947       | 0.935   | 0.979          | 1.29                            | ( 1.16 - 1.43 )        | 1.85.E-06 | <b>1.72E-09</b>   | <b>0.237</b> |
|                |      |             |          |          | Stage-1, set-2  | 0.943       | 0.934   | 0.883          | 1.19                            | ( 1.08 - 1.31 )        | 4.17.E-04 |                   |              |
|                |      |             |          |          | Stage-2         | 0.949       | 0.943   |                | 1.13                            | ( 0.995 - 1.28 )       | 5.92.E-02 |                   |              |
|                |      |             |          |          | <b>combined</b> |             |         |                | <b>1.21</b>                     | <b>( 1.14 - 1.29 )</b> |           |                   |              |
| <b>ASB3</b>    | 2    | rs9309245   | <b>G</b> | C        | Stage-1, set-1  | 0.178       | 0.166   | 0.997          | 1.09                            | ( 1.02 - 1.17 )        | 8.73.E-03 | <b>2.10E-07</b>   | <b>0.278</b> |
|                |      |             |          |          | Stage-1, set-2  | 0.186       | 0.168   | 0.998          | 1.14                            | ( 1.08 - 1.21 )        | 7.08.E-06 |                   |              |
|                |      |             |          |          | Stage-2         | 0.181       | 0.173   |                | 1.06                            | ( 0.98 - 1.14 )        | 1.22.E-01 |                   |              |
|                |      |             |          |          | <b>combined</b> |             |         |                | <b>1.10</b>                     | <b>( 1.06 - 1.15 )</b> |           |                   |              |
| <b>ATP8B2</b>  | 1    | rs67156297  | <b>A</b> | G        | Stage-1, set-1  | 0.103       | 0.087   | 0.966          | 1.21                            | ( 1.11 - 1.32 )        | 8.52.E-06 | <b>2.22E-08</b>   | <b>0.239</b> |
|                |      |             |          |          | Stage-1, set-2  | 0.097       | 0.087   | 0.955          | 1.15                            | ( 1.06 - 1.24 )        | 4.89.E-04 |                   |              |
|                |      |             |          |          | Stage-2         | 0.092       | 0.087   |                | 1.09                            | ( 0.99 - 1.20 )        | 9.69.E-02 |                   |              |
|                |      |             |          |          | <b>combined</b> |             |         |                | <b>1.15</b>                     | <b>( 1.10 - 1.21 )</b> |           |                   |              |
| <b>MIR4686</b> | 11   | rs7107784   | <b>G</b> | A        | Stage-1, set-1  | 0.100       | 0.089   | 0.833          | 1.16                            | ( 1.05 - 1.27 )        | 2.17.E-03 | <b>2.72E-07</b>   | <b>0.590</b> |
|                |      |             |          |          | Stage-1, set-2  | 0.102       | 0.090   | 0.821          | 1.17                            | ( 1.08 - 1.27 )        | 1.52.E-04 |                   |              |
|                |      |             |          |          | Stage-2         | 0.093       | 0.086   |                | 1.10                            | ( 0.99 - 1.21 )        | 6.87.E-02 |                   |              |
|                |      |             |          |          | <b>combined</b> |             |         |                | <b>1.15</b>                     | <b>( 1.09 - 1.21 )</b> |           |                   |              |
| <b>INAFM2</b>  | 15   | rs67839313  | <b>C</b> | T        | Stage-1, set-1  | 0.281       | 0.261   | 0.999          | 1.11                            | ( 1.05 - 1.17 )        | 1.58.E-04 | <b>2.02E-07</b>   | <b>0.570</b> |
|                |      |             |          |          | Stage-1, set-2  | 0.278       | 0.264   | 0.883          | 1.09                            | ( 1.03 - 1.14 )        | 1.59.E-03 |                   |              |
|                |      |             |          |          | Stage-2         | 0.280       | 0.268   |                | 1.06                            | ( 0.998 - 1.13 )       | 5.72.E-02 |                   |              |
|                |      |             |          |          | <b>combined</b> |             |         |                | <b>1.09</b>                     | <b>( 1.05 - 1.12 )</b> |           |                   |              |

Chr:chromosome

Risk: risk allele in the present Japanese study.

non-risk: alternative allele in the present Japanese study.

R<sup>2</sup>: r-square value for the imputation accuracy

OR: odds ratio

95%CI: 95% confidence interval

P-for hetero: p-values of Cochran's Q-test for heterogeneity

Stage-1, set-1; Case n = 9,052, Control n = 5,677, whose clinical information for age, sex and BMI are complete

Stage-1, set-2; Case n = 5,582, Control n = 18,102, whose clinical information for age, sex and BMI are complete

Stage-2; Case n = 7,102, Control n = 5,253, whose clinical information for age, sex and BMI are complete

(total n = 50,768)

Supplementary Table 5 Conditional analysis for *DMRTA1* locus in the Japanese populations

| SNP ID    | Covariates | CHR | POS (Build37) | Risk | Non-risk |                 | CASE RAF | CTRL RAF | R <sup>2</sup> | OR          | 95%CI                         | P-value          | P-het |
|-----------|------------|-----|---------------|------|----------|-----------------|----------|----------|----------------|-------------|-------------------------------|------------------|-------|
| rs1575972 | -          | 9   | 22,301,092    | T    | A        | Stage-1, set-1  | 0.947    | 0.935    | 0.979          | 1.24        | ( 1.13 - 1.36 )               | 8.64.E-06        |       |
|           |            |     |               |      |          | Stage-1, set-2  | 0.943    | 0.935    | 0.883          | 1.17        | ( 1.07 - 1.29 )               | 1.13.E-03        |       |
|           |            |     |               |      |          | Stage-2         | 0.950    | 0.942    |                | 1.16        | ( 1.04 - 1.30 )               | 7.37.E-03        |       |
|           |            |     |               |      |          | <b>combined</b> |          |          |                | <b>1.19</b> | ( <b>1.13</b> - <b>1.26</b> ) | <b>1.43.E-09</b> | 0.64  |
| rs1575972 | rs10811661 | 9   | 22,134,094    | T    | C        | Stage-1, set-1  | 0.947    | 0.935    | 0.979          | 1.23        | ( 1.12 - 1.35 )               | 1.40.E-05        |       |
|           |            |     |               |      |          | Stage-1, set-2  | 0.943    | 0.935    | 0.883          | 1.17        | ( 1.07 - 1.29 )               | 8.19.E-04        |       |
|           |            |     |               |      |          | Stage-2         | 0.950    | 0.942    |                | 1.16        | ( 1.04 - 1.30 )               | 8.52.E-03        |       |
|           |            |     |               |      |          | <b>combined</b> |          |          |                | <b>1.19</b> | ( <b>1.12</b> - <b>1.26</b> ) | <b>2.45.E-09</b> | 0.68  |

RAF; risk allele frequency, R<sup>2</sup>; r-square value for imputation accuracy, OR; odds ratio, 95%CI; 95% confidence interval

P-het; P-value of Cochran's Q-test for heterogeneity

Stage-1, set-1; 9,817 cases and 6,763 controls, imputed

Stage-1, set-2; 5,646 cases and 19,420 controls, imputed

Stage-2; 7,637 cases and 5,093 controls with complete *denovo* genotyped data for rs1575972 and rs10811661

Supplementary Table 6. Conditional analysis for *MIR4686* locus in the Japanese populations

| SNP ID    | Covariates | CHR | POS<br>(Build37) | Risk | Non-risk |                 | CASE RAF | CTRL RAF | R <sup>2</sup> | OR          | 95%CI                         | P-value          | P-het |
|-----------|------------|-----|------------------|------|----------|-----------------|----------|----------|----------------|-------------|-------------------------------|------------------|-------|
| rs7107784 | -          | 11  | 2,215,089        | G    | A        | Stage-1, set-1  | 0.099    | 0.089    | 0.833          | 1.16        | ( 1.07 - 1.26 )               | 4.91.E-04        |       |
|           |            |     |                  |      |          | Stage-1, set-2  | 0.101    | 0.090    | 0.821          | 1.18        | ( 1.09 - 1.27 )               | 3.88.E-05        |       |
|           |            |     |                  |      |          | Stage-2         | 0.095    | 0.084    |                | 1.14        | ( 1.01 - 1.28 )               | 3.11.E-02        |       |
|           |            |     |                  |      |          | <b>combined</b> |          |          |                | <b>1.16</b> | ( <b>1.11</b> - <b>1.22</b> ) | <b>5.77.E-09</b> |       |
| rs7107784 | rs2237897  | 11  | 2,215,089        | G    | A        | Stage-1, set-1  | 0.099    | 0.089    | 0.833          | 1.15        | ( 1.06 - 1.25 )               | 1.04.E-03        |       |
|           |            |     |                  |      |          | Stage-1, set-2  | 0.101    | 0.090    | 0.821          | 1.17        | ( 1.08 - 1.26 )               | 6.97.E-05        |       |
|           |            | 11  | 2,837,316        | C    | T        | Stage-2         | 0.095    | 0.084    |                | 1.13        | ( 1.01 - 1.27 )               | 3.86.E-02        |       |
|           |            |     |                  |      |          | <b>combined</b> |          |          |                | <b>1.16</b> | ( <b>1.10</b> - <b>1.22</b> ) | <b>2.75.E-08</b> |       |

RAF; risk allele frequency, R<sup>2</sup>; r-square value for imputation accuracy, OR; odds ratio, 95%CI; 95% confidence interval

P-het; P-value of Cochran's Q-test for heterogeneity

Stage-1, set-1; 9,817 cases and 6,763 controls, imputed

Stage-1, set-2; 5,646 cases and 19,420 controls, imputed

Stage-2; 6,692 cases and 2,516 controls with complete *denovo* genotyped data for rs7107784 and rs2237897

Supplementary Table 7. Association of 7 novel T2D loci with quantitative traits in non-diabetic controls

| <i>Locus</i>   | Chr | SNPID       | Risk     | FPG <sup>a</sup> |       |         | HOMA-β <sup>a</sup> |       |         | HOMA-IR <sup>a</sup> |       |         | covariates           |
|----------------|-----|-------------|----------|------------------|-------|---------|---------------------|-------|---------|----------------------|-------|---------|----------------------|
|                |     |             |          | β                | s.e.  | p-value | β                   | s.e.  | p-value | β                    | s.e.  | p-value |                      |
| <i>CCDC85A</i> | 2   | rs11116357  | <b>G</b> | 0.031            | 0.020 | 0.113   | 0.032               | 0.025 | 0.197   | 0.041                | 0.025 | 0.093   | -                    |
|                |     |             |          | 0.029            | 0.019 | 0.123   | 0.024               | 0.022 | 0.277   | 0.034                | 0.021 | 0.100   | age, sex and logeBMI |
| <i>FAM60A</i>  | 12  | rs147538848 | <b>A</b> | 0.016            | 0.022 | 0.459   | 0.019               | 0.029 | 0.518   | 0.018                | 0.028 | 0.522   | -                    |
|                |     |             |          | 0.014            | 0.021 | 0.509   | 0.023               | 0.026 | 0.373   | 0.023                | 0.024 | 0.341   | age, sex and logeBMI |
| <i>DMRTA1</i>  | 9   | rs1575972   | <b>T</b> | 0.021            | 0.036 | 0.567   | -0.023              | 0.045 | 0.616   | 0.020                | 0.045 | 0.650   | -                    |
|                |     |             |          | 0.014            | 0.035 | 0.687   | -0.012              | 0.041 | 0.770   | 0.027                | 0.038 | 0.483   | age, sex and logeBMI |
| <i>ASB3</i>    | 2   | rs9309245   | <b>G</b> | -0.025           | 0.022 | 0.256   | 0.075               | 0.029 | 0.009   | 0.050                | 0.029 | 0.078   | -                    |
|                |     |             |          | -0.030           | 0.021 | 0.163   | 0.065               | 0.026 | 0.012   | 0.038                | 0.024 | 0.116   | age, sex and logeBMI |
| <i>ATP8B2</i>  | 1   | rs67156297  | <b>A</b> | -0.004           | 0.031 | 0.910   | -0.025              | 0.041 | 0.540   | -0.027               | 0.041 | 0.507   | -                    |
|                |     |             |          | 0.007            | 0.030 | 0.821   | 0.001               | 0.037 | 0.972   | 0.014                | 0.034 | 0.679   | age, sex and logeBMI |
| <i>MIR4686</i> | 11  | rs7107784   | <b>G</b> | 0.083            | 0.032 | 0.009   | 0.024               | 0.041 | 0.555   | 0.087                | 0.040 | 0.031   | -                    |
|                |     |             |          | 0.065            | 0.030 | 0.032   | 0.030               | 0.036 | 0.409   | 0.082                | 0.034 | 0.015   | age, sex and logeBMI |
| <i>INAFM2</i>  | 15  | rs67839313  | <b>C</b> | 0.018            | 0.019 | 0.360   | -0.008              | 0.025 | 0.756   | -0.002               | 0.025 | 0.925   | -                    |
|                |     |             |          | 0.019            | 0.018 | 0.312   | -0.014              | 0.023 | 0.548   | -0.006               | 0.021 | 0.766   | age, sex and logeBMI |

FPG: Fasting Plasma Glucose, HOMA-β:homeostatic model assessment for beta cell function, HOMA-IR: HOMA for insulin resistance

Risk: risk allele for type 2 diabetes in the present study

a values are log-transformed for the analyses

β: β-coefficient , s.e.: standard error, p-value: p-value for the association

n = 1,744 for FPG, n = 1,324 for HOMA-β, n = 1,324 for HOMA-IR,

Supplementary Table 8. Association look-up data for novel 7 T2D loci in a meta analysis of quantitative glycaemic traits in non-diabetic individuals of European decent from MAGIC Investigators

1) Fasting Plasma Glucose(FPG) and 2h-glucose in up to 133,010 and 42,854 non-diabetic individuals from MetaboChip replication data sets\*

| SNPID       | Risk | Other | Proxy SNP  | Risk | Other | FPG       |           |         | 2h glucose |           |         |
|-------------|------|-------|------------|------|-------|-----------|-----------|---------|------------|-----------|---------|
|             |      |       |            |      |       | $\beta$   | s.e.      | P-value | $\beta$    | s.e.      | P-value |
| rs1116357   | G    | A     | N/A        |      |       |           |           |         |            |           |         |
| rs147538848 | A    | G     | N/A        |      |       |           |           |         |            |           |         |
| rs1575972   | T    | A     | rs11791293 | C    | T     | 1.30.E-02 | 6.50.E-03 | 0.052   | -4.20.E-03 | 3.60.E-02 | 0.91    |
| rs9309245   | G    | C     | N/A        |      |       |           |           |         |            |           |         |
| rs67156297  | A    | G     | N/A        |      |       |           |           |         |            |           |         |
| rs7107784   | G    | A     | rs7111341  | T    | C     | 2.20.E-03 | 2.50.E-03 | 0.373   | 4.00.E-04  | 1.40.E-02 | 0.98    |
| rs67839313  | C    | T     | N/A        |      |       |           |           |         |            |           |         |

2) Fasting Plasma Insulin (FPI) and FPI adjusted for BMI in up to 108,557 individuals from MetaboChip replication data sets\*

| SNPID       | Risk | Other | Proxy SNP  | Risk | Other | FPI        |           |               | FPI adjusted for BMI |           |               |
|-------------|------|-------|------------|------|-------|------------|-----------|---------------|----------------------|-----------|---------------|
|             |      |       |            |      |       | $\beta$    | s.e.      | P-value       | $\beta$              | s.e.      | P-value       |
| rs1116357   | G    | A     | N/A        |      |       |            |           |               |                      |           |               |
| rs147538848 | A    | G     | N/A        |      |       |            |           |               |                      |           |               |
| rs1575972   | T    | A     | rs11791293 | C    | T     | -2.20.E-02 | 7.70.E-03 | <b>0.0039</b> | -2.00.E-02           | 6.80.E-03 | <b>0.0027</b> |
| rs9309245   | G    | C     | N/A        |      |       |            |           |               |                      |           |               |
| rs67156297  | A    | G     | N/A        |      |       |            |           |               |                      |           |               |
| rs7107784   | G    | A     | rs7111341  | T    | C     | 7.80.E-03  | 2.90.E-03 | <b>0.0066</b> | 4.10.E-03            | 2.40.E-03 | 0.0888        |
| rs67839313  | C    | T     | N/A        |      |       |            |           |               |                      |           |               |

3) Fasting Plasma Glucose(FPG) and FPG adjusted for BMI in up to 58,074 individuals \*\*

| SNPID       | Risk | Other | Proxy SNP  | Risk | Other | FPG        |           |         | FPG adjusted for BMI |           |         |
|-------------|------|-------|------------|------|-------|------------|-----------|---------|----------------------|-----------|---------|
|             |      |       |            |      |       | $\beta$    | s.e.      | P-value | $\beta$              | s.e.      | P-value |
| rs1116357   | G    | A     |            |      |       | 1.80.E-03  | 3.10.E-03 | 0.56    | 1.00.E-03            | 3.20.E-03 | 0.74    |
| rs147538848 | A    | G     | N/A        |      |       |            |           |         |                      |           |         |
| rs1575972   | T    | A     |            |      |       | 1.20.E-02  | 9.90.E-03 | 0.21    | 1.10.E-02            | 1.00.E-02 | 0.28    |
| rs9309245   | G    | C     |            |      |       | -2.40.E-03 | 3.20.E-03 | 0.45    | 5.00.E-04            | 3.30.E-03 | 0.89    |
| rs67156297  | A    | G     | rs12025518 | c    | a     | -8.00.E-04 | 3.70.E-03 | 0.84    | -2.40.E-03           | 3.80.E-03 | 0.53    |
| rs7107784   | G    | A     | rs7111341  | t    | c     | -2.00.E-03 | 3.90.E-03 | 0.61    | -4.90.E-03           | 3.90.E-03 | 0.21    |
| rs67839313  | C    | T     | rs4924456  | g    | c     | 3.00.E-04  | 3.80.E-03 | 0.95    | 8.00.E-04            | 3.90.E-03 | 0.84    |

4) Fasting Plasma Insulin (FPI) and FPI adjusted for BMI in up to 51,750 individuals\*\*

| SNPID       | Risk | Other | Proxy SNP  | Risk | Other | FPI        |           |              | FPI adjusted for BMI |           |                 |
|-------------|------|-------|------------|------|-------|------------|-----------|--------------|----------------------|-----------|-----------------|
|             |      |       |            |      |       | $\beta$    | s.e.      | P-value      | $\beta$              | s.e.      | P-value         |
| rs1116357   | G    | A     |            |      |       | 5.40.E-03  | 3.10.E-03 | 0.084        | 6.00.E-03            | 2.70.E-03 | <b>0.02436</b>  |
| rs147538848 | A    | G     | N/A        |      |       |            |           |              |                      |           |                 |
| rs1575972   | T    | A     |            |      |       | -2.50.E-02 | 1.10.E-02 | <b>0.019</b> | -2.60.E-02           | 9.30.E-03 | <b>0.004821</b> |
| rs9309245   | G    | C     |            |      |       | -3.00.E-04 | 3.30.E-03 | 0.94         | -2.90.E-03           | 2.80.E-03 | 0.2943          |
| rs67156297  | A    | G     | rs12025518 | c    | a     | 3.90.E-03  | 3.70.E-03 | 0.30         | 3.40.E-03            | 3.20.E-03 | 0.2869          |
| rs7107784   | G    | A     | rs7111341  | t    | c     | 5.40.E-03  | 3.90.E-03 | 0.17         | 1.20.E-03            | 3.30.E-03 | 0.7157          |
| rs67839313  | C    | T     | rs4924456  | g    | c     | 4.00.E-04  | 3.80.E-03 | 0.92         | 1.00.E-04            | 3.30.E-03 | 0.9739          |

5) HbA1c association results in up to 46,368 individuals\*\*\*

| SNPID       | Risk | Other | Proxy SNP  | Risk | Other | HbA1c      |           |              |
|-------------|------|-------|------------|------|-------|------------|-----------|--------------|
|             |      |       |            |      |       | $\beta$    | s.e.      | P-value      |
| rs1116357   | G    | A     |            |      |       | 3.00.E-04  | 3.40.E-03 | 0.93         |
| rs147538848 | A    | G     | N/A        |      |       |            |           |              |
| rs1575972   | T    | A     |            |      |       | 1.35.E-02  | 1.04.E-02 | 0.19         |
| rs9309245   | G    | C     |            |      |       | 8.10.E-03  | 3.50.E-03 | <b>0.022</b> |
| rs67156297  | A    | G     | rs12025518 | c    | a     | 4.10.E-03  | 4.00.E-03 | 0.31         |
| rs7107784   | G    | A     | rs7111341  | t    | c     | 2.00.E-03  | 4.70.E-03 | 0.67         |
| rs67839313  | C    | T     | rs4924456  | g    | c     | -1.60.E-03 | 4.80.E-03 | 0.73         |

FPG; Fasting plasma glucose, FPI; Fasting plasma insulin

$\beta$ ;beta-coefficient, s.e.; standard error

Data on glycaemic traits have been contributed by MAGIC investigators and have been downloaded from [www.magicinvestigators.org](http://www.magicinvestigators.org)

\* Scott RA et al. Nature genetics 2012;44;9;991-1005

\*\*Manning AK et al. Nature genetics 2012;44;6;659-69

\*\*\*Soranzo N et al.Diabetes 2010;59;12;3229-39

Best proxy SNPs used in the analysis

rs1575972-T ; rs11791293-C (CEU  $r^2 = 1$ )

rs67156297-A; rs12025518-C (CEU  $r^2 = 1$ )

rs7107784-G; rs7111341-T (CEU  $r^2 = 0.84$ )

rs67839313-C; rs4924456-G (JPT  $r^2 = 0.84$ )



**Supplementary Table 9. Information on each analysis and Sample**

| Sample               | Ethnicity    | Sample size |         |         | Genotyping                     |                  |                  |                                                          | SNP imputation   |                                                                                                   |                 |                 | Association test           |
|----------------------|--------------|-------------|---------|---------|--------------------------------|------------------|------------------|----------------------------------------------------------|------------------|---------------------------------------------------------------------------------------------------|-----------------|-----------------|----------------------------|
|                      |              | Case        | Control | Total   | Platform                       | QC (SNP)         | QC (Sample)      | covariate                                                | Method           | Reference panel                                                                                   | QC1             | QC2             |                            |
| Stage-1, set-1 (BBJ) | Japanese     | 9,817       | 6,763   | 16,580  | Omni express exome             | Call rate > 0.99 | Call rate > 0.98 | none                                                     | MACH and Minimac | 1000 Genomes Phase 1 (March 2012) (CHB+CHS+JPT)                                                   | $r^2 \geq 0.7$  | $r^2 \geq 0.7$  | mach2dat                   |
| Stage-1, set-2 (BBJ) | Japanese     | 5,646       | 19,420  | 25,066  | Illumina humanhap 610Quad      | Call rate > 0.99 | Call rate > 0.98 | none                                                     | MACH and Minimac | 1000 Genomes Phase 1 (March 2012) (CHB+CHS+JPT)                                                   | $r^2 \geq 0.7$  | $r^2 \geq 0.7$  | mach2dat                   |
| Stage-2              | Japanese     | 7,936       | 5,539   | 13,475  | Multiplex PCR invader assay    | Call rate > 0.95 | NA               | none                                                     | NA               | NA                                                                                                | NA              | NA              | SAS-JMP                    |
| SDIID/SDS            | Chinese      | 3,341       | 3,353   | 6,694   | MassARRAY                      | Call rate > 0.95 | NA               | none                                                     | NA               | NA                                                                                                | NA              | NA              | SAS                        |
| HK1 (HK GWAS)        | Chinese      | 99          | 99      | 198     | Illumina Hap550                | Call rate > 0.99 | Call rate > 0.95 | none                                                     | MACH 1.0         | 1000 G(March 2010 release) 60 CHB+JPT                                                             | $r^2 \geq 0.5$  | $r^2 \geq 0.7$  | mach2dat                   |
| HK2 (HN GWAS)        | Chinese      | 388         | 659     | 1,047   | Illumina humanhap 610Quad      | Call rate > 0.99 | Call rate > 0.95 | none                                                     | MACH 1.0         | 1000 G(March 2010 release) 60 CHB+JPT                                                             | $r^2 \geq 0.5$  | $r^2 \geq 0.7$  | mach2dat                   |
| SDGS                 | Chinese      | 1,425       | 3,764   | 5,189   | Affymetrix 6.0                 | Call rate > 0.99 | Call rate > 0.95 | age, study                                               | Minimac          | 1000G Phase I, 1092 samples                                                                       | $r^2 \geq 0.3$  | $r^2 \geq 0.7$  | mach2dat                   |
| SCES                 | Chinese      | 302         | 1,090   | 1,392   | Illumina humanhap 610Quad      | Call rate > 0.99 | Call rate > 0.95 | none                                                     | IMPUTE ver 2     | 1000G Phase I v3 (March 2012), 1092 samples                                                       | info $\geq 0.5$ | info $\geq 0.7$ | SNPTEST                    |
| SIMES                | Malay        | 794         | 1,240   | 2,034   | Illumina humanhap 610Quad      | Call rate > 0.99 | Call rate > 0.95 | none                                                     | IMPUTE ver 2     | 1000G Phase I v3 (March 2012), 1092 samples                                                       | info $\geq 0.5$ | info $\geq 0.7$ | SNPTEST                    |
| sp1M                 | Chinese      | 928         | 939     | 1,867   | Illumina humanhap 1Mduov3      | Call rate > 0.99 | Call rate > 0.95 | none                                                     | IMPUTE ver 2     | 1000G Phase I v3 (March 2012), 1092 samples                                                       | info $\geq 0.5$ | info $\geq 0.7$ | SNPTEST                    |
| sp610                | Chinese      | 1,082       | 1,006   | 2,088   | Illumina humanhap 610Quad      | Call rate > 0.99 | Call rate > 0.95 | none                                                     | IMPUTE ver 2     | 1000G Phase I v3 (March 2012), 1092 samples                                                       | info $\geq 0.5$ | info $\geq 0.7$ | SNPTEST                    |
| KARE                 | Korean       | 1,042       | 2,943   | 3,985   | Affymetrix 5.0                 | Call rate > 0.99 | Call rate > 0.95 | age, sex, area                                           | Minimac          | 1000G Phase I v3 Shapelt2, 1092 samples                                                           | -               | $r^2 \geq 0.7$  | mach2dat                   |
| H2T2DS               | Korean       | 1,183       | 1,305   | 2,488   | Affymetrix 6.0                 | Call rate > 0.99 | Call rate > 0.95 | age, sex                                                 | Minimac          | 1000G Phase I v3 Shapelt2, 1092 samples                                                           | -               | $r^2 \geq 0.7$  | mach2dat                   |
| SNUH                 | Korean       | 1,970       | 985     | 2,955   | Affymetrix Axiom® Biobank Plus | Call rate > 0.99 | Call rate > 0.95 | none                                                     | NA               | NA                                                                                                | NA              | NA              | PLINK                      |
| Danish studies 1*    | Danish       | 1,859*      | 6,922*  | 8,781*  | Metabohip                      | Call rate > 0.95 | Call rate > 0.95 | age, sex, BMI                                            | NA               | NA                                                                                                | NA              | NA              | PLINK                      |
| Danish studies 2**   | Danish       | 4,107**     | 5,627** | 9,734** | LGC Genomics                   | Call rate > 0.95 | Call rate > 0.95 | age, sex, BMI                                            | NA               | NA                                                                                                | NA              | NA              | R 3.1.1                    |
| DIAGRAM3             | European     | 12,171      | 56,862  | 69,033  | ***                            | ***              | ***              | ***                                                      | ***              | ***                                                                                               | ***             | ***             | ***                        |
| DIAGRAM Metabohip    | European #   | 22,669      | 58,119  | 80,788  | ***                            | ***              | ***              | ***                                                      | ***              | ***                                                                                               | ***             | NA              | ***                        |
| SINDI                | Indian       | 977         | 1,169   | 2,146   | Illumina humanhap 610Quad      | Call rate > 0.99 | Call rate > 0.95 | none                                                     | IMPUTE ver 2     | 1000G Phase I v3 (March 2012), 1092 samples                                                       | info $\geq 0.5$ | info $\geq 0.7$ | SNPTEST                    |
| PROMIS1              | Indian       | 2,718       | 6,326   | 9,044   | Illumina Omniexpress           | Call rate > 0.99 | Call rate > 0.95 | age,sex, PCs1-5                                          | IMPUTE ver 2     | 1000 G(March 2010 release)                                                                        | info $\geq 0.9$ | info $\geq 0.9$ | SNPTEST                    |
| PROMIS2              | Indian       | 4,365       | 3,984   | 8,349   | Illumina 660 Quad              | Call rate > 0.99 | Call rate > 0.95 | age,sex, PCs1-5                                          | IMPUTE ver 2     | 1000 G(March 2010 release)                                                                        | info $\geq 0.9$ | info $\geq 0.9$ | SNPTEST                    |
| RACE1                | Indian       | 602         | 598     | 1,200   | Illumina 660 Quad              | Call rate > 0.99 | Call rate > 0.95 | age,sex, PCs1-5                                          | IMPUTE ver 2     | 1000 G(March 2010 release)                                                                        | info $\geq 0.9$ | info $\geq 0.9$ | SNPTEST                    |
| RACE2                | Indian       | 1,084       | 1,527   | 2,611   | IlluminaOmniexpress            | Call rate > 0.99 | Call rate > 0.95 | age,sex, PCs1-5                                          | IMPUTE ver 2     | 1000 G(March 2010 release)                                                                        | info $\geq 0.9$ | info $\geq 0.9$ | SNPTEST                    |
| AIDHS/SDS            | Punjabi Sikh | 841         | 774     | 1,615   | Illumina 660W Quad Beadchip    | Call rate > 0.95 | Call rate > 0.95 | age, sex, BMI, 5 PC age and BMI as liability covariates; | IMPUTE ver 2     | 1000G Phase I, V3 Shapelt2, 1092 samples                                                          | info > 0.8      | info > 0.8      | SNPTEST V 2.3.0            |
| SIGMA                | Mexican      | 3,848       | 4,366   | 8,214   | Illumina OMNI 2.5 array        | Call rate > 0.98 | Call rate > 0.98 | sex, PC1 adn PC2, as fixed covariates                    | IMPUTE v2.2      | 1000 Genomes Phase I integrated variant set (build 37 and haplotype release date in August, 2012) | info $\geq 0.6$ | info $\geq 0.7$ | LTSOFT v1 and Plink v1.08p |

\* Information on analyses for rs1575972 and rs7107784 in Inter99, Health2006 and SDC

\*\* Information on analyses for rs1116357, rs67156297, rs67839313, rs9309245 and rs147538848 in Inter99, Vejle Biobank, ADDITION and SDC

\*\*\* Please refer the original article (Morris, A.P. et al. Nat. Genet. 44, 981–990, 2012)

QC1: Information on quality control criteria for imputation accuracy in each cohort is shown

QC2: Association data with lower imputation quality,  $r^2 < 0.7$  or info  $< 0.7$ , were not used for the further meta-analyses.

# primarily from European descent, but including 1,178 T2D and 2,472 controls of Pakistani descent



Supplementary Table 11. BMI-differentiated analysis for established T2D loci; heterogeneity p-value < 0.05

| Nearby gene         | Chr | position<br>(build 37) | SNP         | risk<br>allele | non-<br>risk<br>allele | BMI < 25 |                 |           | BMI ≥ 25 |                 |           | BMI < 25, BMI ≥ 25 combined |                 |           |                  |
|---------------------|-----|------------------------|-------------|----------------|------------------------|----------|-----------------|-----------|----------|-----------------|-----------|-----------------------------|-----------------|-----------|------------------|
|                     |     |                        |             |                |                        | OR       | 95%CI           | P-value   | OR       | 95%CI           | P-value   | OR                          | 95%CI           | P-value   | P-hetero         |
| <i>KCNQ1</i>        | 11  | 2,858,546              | rs2237897   | C              | T                      | 1.43     | ( 1.37 - 1.49 ) | 1.28.E-63 | 1.22     | ( 1.15 - 1.31 ) | 9.94.E-10 | 1.37                        | ( 1.32 - 1.41 ) | 2.07.E-68 | <b>8.89.E-05</b> |
| <i>KCNQ1</i>        | 11  | 2,858,440              | rs2237896   | G              | A                      | 1.41     | ( 1.36 - 1.47 ) | 5.22.E-62 | 1.22     | ( 1.14 - 1.30 ) | 1.46.E-09 | 1.35                        | ( 1.31 - 1.40 ) | 1.06.E-66 | <b>1.07.E-04</b> |
| <i>IGF2BP2</i>      | 3   | 185,529,080            | rs1470579   | C              | A                      | 1.25     | ( 1.20 - 1.30 ) | 1.08.E-26 | 1.11     | ( 1.04 - 1.18 ) | 2.75.E-03 | 1.21                        | ( 1.17 - 1.25 ) | 1.53.E-26 | 1.88.E-03        |
| <i>IGF2BP2</i>      | 3   | 185,530,290            | rs6769511   | C              | T                      | 1.25     | ( 1.20 - 1.30 ) | 1.81.E-26 | 1.10     | ( 1.03 - 1.18 ) | 3.32.E-03 | 1.21                        | ( 1.17 - 1.25 ) | 2.68.E-26 | 2.17.E-03        |
| <i>IGF2BP2</i>      | 3   | 185,511,687            | rs4402960   | T              | G                      | 1.25     | ( 1.20 - 1.30 ) | 5.19.E-26 | 1.10     | ( 1.03 - 1.18 ) | 3.73.E-03 | 1.21                        | ( 1.16 - 1.25 ) | 7.19.E-26 | 2.61.E-03        |
| <i>ADCY5</i>        | 3   | 123,139,863            | rs79223353  | G              | A                      | 1.13     | ( 1.08 - 1.18 ) | 8.73.E-08 | 0.99     | ( 0.93 - 1.07 ) | 8.81.E-01 | 1.09                        | ( 1.05 - 1.13 ) | 9.59.E-06 | 2.59.E-03        |
| <i>HMG20A</i>       | 15  | 77,747,190             | rs7178572   | A              | G                      | 1.09     | ( 1.05 - 1.13 ) | 1.93.E-05 | 1.00     | ( 0.94 - 1.06 ) | 9.93.E-01 | 1.06                        | ( 1.03 - 1.10 ) | 3.00.E-04 | 2.27.E-02        |
| <i>CDC123</i>       | 10  | 12,307,894             | rs11257655  | T              | C                      | 1.16     | ( 1.12 - 1.21 ) | 1.60.E-14 | 1.07     | ( 1.01 - 1.14 ) | 3.42.E-02 | 1.14                        | ( 1.10 - 1.17 ) | 2.23.E-14 | 2.35.E-02        |
| <i>CDC123</i>       | 10  | 12,314,997             | rs10906115  | A              | G                      | 1.13     | ( 1.09 - 1.18 ) | 2.07.E-10 | 1.05     | ( 0.99 - 1.12 ) | 1.08.E-01 | 1.11                        | ( 1.07 - 1.15 ) | 4.89.E-10 | 3.91.E-02        |
| <i>POU5F1-TCF19</i> | 6   | 31,127,037             | rs115801775 | C              | T                      | 1.18     | ( 1.10 - 1.26 ) | 1.26.E-06 | 1.02     | ( 0.92 - 1.14 ) | 6.51.E-01 | 1.13                        | ( 1.07 - 1.20 ) | 1.41.E-05 | 2.80.E-02        |
| <i>POU5F1-TCF19</i> | 6   | 31,136,453             | rs115164593 | G              | A                      | 1.11     | ( 1.06 - 1.17 ) | 2.40.E-05 | 1.01     | ( 0.94 - 1.09 ) | 7.63.E-01 | 1.08                        | ( 1.04 - 1.13 ) | 1.94.E-04 | 4.43.E-02        |
| <i>TCF7L2</i>       | 10  | 114,758,349            | rs7903146   | T              | C                      | 1.58     | ( 1.45 - 1.72 ) | 2.54.E-24 | 1.30     | ( 1.12 - 1.51 ) | 7.22.E-04 | 1.50                        | ( 1.39 - 1.62 ) | 8.64.E-26 | 2.94.E-02        |
| <i>TCF7L2</i>       | 10  | 114,754,071            | rs34872471  | C              | T                      | 1.58     | ( 1.45 - 1.73 ) | 4.63.E-24 | 1.30     | ( 1.12 - 1.51 ) | 7.52.E-04 | 1.50                        | ( 1.39 - 1.62 ) | 1.63.E-25 | 2.97.E-02        |
| <i>SLC16A11/13</i>  | 17  | 6,945,483              | rs75418188  | T              | C                      | 1.29     | ( 1.20 - 1.38 ) | 7.45.E-13 | 1.12     | ( 1.00 - 1.26 ) | 5.21.E-02 | 1.24                        | ( 1.17 - 1.32 ) | 8.57.E-13 | 4.42.E-02        |

Chr:chromosome

Risk allele: risk allele in the present Japanese study

non-risk allele: alternative allele in the present Japanese study

OR: odds ratio

95%CI: 95% confidence interval

P-value: p-value for association with type 2 diabetes

P-for hetero: p-values of Cochran's Q-test for heterogeneity

All association data are adjusted for age, sex and loge-transformed BMI

This analysis includes Stage-1(set-1 + set-2) participants whose clinical information for age, sex and BMI are complete (total n= 38,413)

BMI < 25 ; total Case n = 9,841, Control n = 18,818, Stage-1,set-1: Case n = 6,105, Control n = 4,476, Stage-1, set-2: Case n = 3,736, Control n = 14,342

BMI ≥ 25 ; total Case n = 4,793, Control n = 4,961, Stage-1,set-1: Case n = 2,947, Control n = 1,201, Stage-1, set-2: Case n = 1,846, Control n = 3,760

Supplementary Table 12. Sex-differentiated analysis for previously reported T2D loci

1) heterogeneity between male and female ;p < 0.05

| Nearby Gene    | Chr | position    | SNP        | risk allele | non-risk allele | R <sup>2</sup> set-1 | R <sup>2</sup> set-2 | male |                 |           | female |                 |           | male, female combined |                 |           |           |
|----------------|-----|-------------|------------|-------------|-----------------|----------------------|----------------------|------|-----------------|-----------|--------|-----------------|-----------|-----------------------|-----------------|-----------|-----------|
|                |     |             |            |             |                 |                      |                      | OR   | 95%CI           | P-value   | OR     | 95%CI           | P-value   | OR                    | 95%CI           | P-value   | P-hetero  |
| <i>GCKR</i>    | 2   | 27,741,237  | rs780094   | C           | T               | 1.00                 | 1.00                 | 1.12 | ( 1.07 - 1.17 ) | 9.70.E-08 | 1.02   | ( 0.97 - 1.08 ) | 4.18.E-01 | 1.08                  | ( 1.05 - 1.12 ) | 1.99.E-06 | 1.09.E-02 |
| <i>ANK1</i>    | 8   | 41,509,259  | rs12549902 | A           | G               | 1.00                 | 1.00                 | 1.15 | ( 1.11 - 1.20 ) | 9.01.E-12 | 1.08   | ( 1.02 - 1.14 ) | 8.32.E-03 | 1.13                  | ( 1.09 - 1.16 ) | 2.03.E-12 | 4.45.E-02 |
| <i>HNF4A</i>   | 20  | 42,989,267  | rs4812829  | A           | G               | 0.99                 | 1.00                 | 1.05 | ( 1.01 - 1.09 ) | 1.96.E-02 | 1.13   | ( 1.07 - 1.19 ) | 1.35.E-05 | 1.08                  | ( 1.04 - 1.11 ) | 7.62.E-06 | 3.68.E-02 |
| <i>SLC30A8</i> | 8   | 118,185,025 | rs3802177  | G           | A               | 1.00                 | 1.00                 | 1.08 | ( 1.04 - 1.13 ) | 2.45.E-04 | 1.20   | ( 1.14 - 1.27 ) | 1.21.E-10 | 1.12                  | ( 1.09 - 1.16 ) | 1.27.E-11 | 2.65.E-03 |
| <i>UBE2E2</i>  | 3   | 23,454,565  | rs1845900  | A           | G               | 0.95                 | 0.95                 | 1.14 | ( 1.08 - 1.21 ) | 7.22.E-06 | 1.28   | ( 1.19 - 1.39 ) | 4.96.E-10 | 1.19                  | ( 1.13 - 1.24 ) | 3.01.E-13 | 1.77.E-02 |

2) Known T2D loci which heterogeneity between male and female have been reported\*

| Nearby Gene   | Chr | position    | SNP        | risk allele | non-risk allele | R <sup>2</sup> set-1 | R <sup>2</sup> set-2 | male |                 |           | female |                 |           | male, female combined |                 |           |           |
|---------------|-----|-------------|------------|-------------|-----------------|----------------------|----------------------|------|-----------------|-----------|--------|-----------------|-----------|-----------------------|-----------------|-----------|-----------|
|               |     |             |            |             |                 |                      |                      | OR   | 95%CI           | P-value   | OR     | 95%CI           | P-value   | OR                    | 95%CI           | P-value   | P-hetero  |
| <i>CCND2</i>  | 12  | 4,374,373   | rs11063069 | G           | A               | 0.99                 | 0.33                 | 1.17 | ( 0.98 - 1.39 ) | 8.52.E-02 | 0.93   | ( 0.74 - 1.16 ) | 5.05.E-01 | 1.07                  | ( 0.93 - 1.23 ) | 3.43.E-01 | 1.13.E-01 |
| <i>CCND2</i>  | 12  | 4,363,420   | rs4766228  | A           | G               | 0.97                 | 0.98                 | 1.07 | ( 1.03 - 1.12 ) | 1.61.E-03 | 1.01   | ( 0.95 - 1.06 ) | 8.18.E-01 | 1.05                  | ( 1.01 - 1.08 ) | 7.97.E-03 | 8.52.E-02 |
| <i>GIPR</i>   | 19  | 46,158,513  | rs8108269  | G           | T               | 1.00                 | 1.00                 | 1.07 | ( 1.03 - 1.12 ) | 1.34.E-03 | 1.13   | ( 1.07 - 1.20 ) | 2.55.E-05 | 1.09                  | ( 1.06 - 1.13 ) | 3.67.E-07 | 1.43.E-01 |
| <i>KCNQ1</i>  | 11  | 2,847,069   | rs163184   | G           | T               | 1.00                 | 1.00                 | 1.23 | ( 1.18 - 1.29 ) | 1.37.E-23 | 1.24   | ( 1.18 - 1.32 ) | 2.10.E-14 | 1.24                  | ( 1.20 - 1.28 ) | 2.29.E-36 | 8.32.E-01 |
| <i>KCNQ1</i>  | 11  | 2,858,546   | rs2237897  | C           | T               | 0.96                 | 0.94                 | 1.37 | ( 1.31 - 1.44 ) | 3.76.E-45 | 1.34   | ( 1.26 - 1.42 ) | 1.25.E-22 | 1.36                  | ( 1.31 - 1.41 ) | 5.84.E-66 | 5.30.E-01 |
| <i>DGKB</i>   | 7   | 14,898,282  | rs17168486 | T           | C               | 0.99                 | 0.99                 | 1.05 | ( 1.01 - 1.10 ) | 1.45.E-02 | 1.07   | ( 1.01 - 1.13 ) | 1.81.E-02 | 1.06                  | ( 1.02 - 1.10 ) | 7.40.E-04 | 6.67.E-01 |
| <i>GRB14</i>  | 2   | 165,501,849 | rs3923113  | A           | C               | 0.67                 | 0.99                 | 1.08 | ( 1.00 - 1.16 ) | 3.74.E-02 | 1.18   | ( 1.06 - 1.31 ) | 1.96.E-03 | 1.11                  | ( 1.05 - 1.18 ) | 5.03.E-04 | 1.77.E-01 |
| <i>GRB14</i>  | 2   | 165,528,876 | rs13389219 | C           | T               | 1.00                 | 0.99                 | 1.11 | ( 1.03 - 1.20 ) | 4.88.E-03 | 1.19   | ( 1.07 - 1.33 ) | 1.13.E-03 | 1.14                  | ( 1.07 - 1.21 ) | 2.98.E-05 | 2.97.E-01 |
| <i>BCL11A</i> | 2   | 60,568,745  | rs243088   | T           | A               | 1.00                 | 1.00                 | 1.02 | ( 0.98 - 1.07 ) | 2.96.E-01 | 1.05   | ( 0.99 - 1.11 ) | 1.31.E-01 | 1.03                  | ( 1.00 - 1.07 ) | 8.16.E-02 | 5.62.E-01 |

Chr:chromosome

Risk allele: risk allele in the present Japanese study.

non-risk allele: alternative allele in the present Japanese study.

R<sup>2</sup>: r-square value for imputation accuracy

OR: odds ratio

95%CI: 95% confidence interval

P-value: p-value for association with type 2 diabetes

P-for hetero: p-values of Cochran's Q-test for heterogeneity

All association data are adjusted for age, sex and loge-transformed BMI

This analysis includes participants whose clinical information for age, sex and BMI are complete (total n= 38,413)

male ; total Case n = 13,947, Control n = 15,634, Stage-1, set-1: Case n = 5,749, Control n = 3,302, Stage-1, set-2: Case n = 3,823, Control n = 9,164

female ; total Case n = 7,806, Control n = 14,315, Stage-1, set-1: Case n = 3,303, Control n = 2,375, Stage-1, set-2: Case n = 1,759, Control n = 8,938

\* Morris, A.P. et al. Nat. Genet. 44, 981-990 (2012).

Supplementary Table 13. BMI-differentiated analysis for novel 7 SNP loci

|                    |     |             |             |                 | BMI < 25 Stage1+2 meta-analysis |                 |           | BMI ≥ 25 Stage1+2 meta-analysis |                 |           | BMI < 25, BMI ≥25 combined |                 |           |          |
|--------------------|-----|-------------|-------------|-----------------|---------------------------------|-----------------|-----------|---------------------------------|-----------------|-----------|----------------------------|-----------------|-----------|----------|
| <i>Nearby Gene</i> | Chr | SNP         | risk allele | non-risk allele | OR                              | 95%CI           | P-value   | OR                              | 95%CI           | P-value   | OR                         | 95%CI           | P-value   | P-hetero |
| <i>CCDC85A</i>     | 2   | rs1116357   | <b>G</b>    | A               | 1.08                            | ( 1.04 - 1.12 ) | 1.75.E-05 | 1.08                            | ( 1.02 - 1.14 ) | 1.33.E-02 | 1.08                       | ( 1.05 - 1.12 ) | 7.39.E-07 | 0.86     |
| <i>FAM60A</i>      | 12  | rs147538848 | <b>A</b>    | G               | 1.14                            | ( 1.09 - 1.19 ) | 6.99.E-09 | 1.10                            | ( 1.03 - 1.18 ) | 6.80.E-03 | 1.13                       | ( 1.09 - 1.17 ) | 2.29.E-10 | 0.47     |
| <i>DMRTA1</i>      | 9   | rs1575972   | <b>T</b>    | A               | 1.26                            | ( 1.17 - 1.36 ) | 1.48.E-09 | 1.11                            | ( 0.99 - 1.24 ) | 7.47.E-02 | 1.21                       | ( 1.14 - 1.29 ) | 1.55.E-09 | 0.07     |
| <i>ASB3</i>        | 2   | rs9309245   | <b>G</b>    | C               | 1.10                            | ( 1.05 - 1.15 ) | 4.13.E-05 | 1.11                            | ( 1.04 - 1.19 ) | 1.93.E-03 | 1.10                       | ( 1.06 - 1.14 ) | 2.98.E-07 | 0.69     |
| <i>ATP8B2</i>      | 1   | rs67156297  | <b>A</b>    | G               | 1.15                            | ( 1.09 - 1.22 ) | 1.94.E-06 | 1.15                            | ( 1.05 - 1.26 ) | 3.81.E-03 | 1.15                       | ( 1.09 - 1.21 ) | 2.46.E-08 | 0.96     |
| <i>MIR4686</i>     | 11  | rs7107784   | <b>G</b>    | A               | 1.16                            | ( 1.09 - 1.23 ) | 2.38.E-06 | 1.12                            | ( 1.01 - 1.24 ) | 2.70.E-02 | 1.15                       | ( 1.09 - 1.21 ) | 2.29.E-07 | 0.56     |
| <i>INAFM2</i>      | 15  | rs67839313  | <b>C</b>    | T               | 1.11                            | ( 1.07 - 1.15 ) | 8.48.E-08 | 1.04                            | ( 0.98 - 1.10 ) | 2.30.E-01 | 1.09                       | ( 1.05 - 1.13 ) | 2.02.E-07 | 0.07     |

Chr:chromosome

Risk allele: risk allele in the present Japanese study.

non-risk allele: alternative allele in the present Japanese study.

R<sup>2</sup>: r-square value for the imputation accuracy

OR: odds ratio

95%CI: 95% confidence interval

P-value: p-value for association with type 2 diabetes

P-for hetero: p-values of Cochran's Q-test for heterogeneity

All association data are adjusted for age, sex and loge-transformed BMI

This analysis includes participants whose clinical information for age, sex and BMI are complete (total n= 50,768)

BMI &lt; 25 ; total Case n = 14,366, Control n = 22,992, Stage-1, set-1: Case n = 6,105, Control n = 4,476, Stage-1, set-2: Case n = 3,736, Control n = 14,342, Stage-2: Case n = 4,525, Control n = 4,174

BMI ≥ 25 ; total Case n = 7,370, Control n = 6,040, Stage-1, set-1: Case n = 2,947, Control n = 1,201, Stage-1, set-2: Case n = 1,846, Control n = 3,760, Stage-2: Case n = 2,577, Control n = 1,079

Supplementary Table 14. Sex-differentiated analysis for novel 7 SNP loci

|                    |     |             |             |                 | male Stage1+2 meta-analysis |                 |           | female Stage1+2 meta-analysis |                  |           | male, female combined |                 |           |          |
|--------------------|-----|-------------|-------------|-----------------|-----------------------------|-----------------|-----------|-------------------------------|------------------|-----------|-----------------------|-----------------|-----------|----------|
| <i>Nearby Gene</i> | Chr | SNP         | risk allele | non-risk allele | OR                          | 95%CI           | P-value   | OR                            | 95%CI            | P-value   | OR                    | 95%CI           | P-value   | P-hetero |
| <i>CCDC85A</i>     | 2   | rs1116357   | <b>G</b>    | A               | 1.10                        | ( 1.06 - 1.14 ) | 2.00.E-06 | 1.05                          | ( 0.997 - 1.10 ) | 6.41.E-02 | 1.08                  | ( 1.05 - 1.12 ) | 1.01.E-06 | 0.15     |
| <i>FAM60A</i>      | 12  | rs147538848 | <b>A</b>    | G               | 1.12                        | ( 1.07 - 1.18 ) | 1.42.E-06 | 1.14                          | ( 1.08 - 1.21 )  | 1.38.E-05 | 1.13                  | ( 1.09 - 1.17 ) | 8.95.E-11 | 0.67     |
| <i>DMRTA1</i>      | 9   | rs1575972   | <b>T</b>    | A               | 1.19                        | ( 1.10 - 1.29 ) | 1.19.E-05 | 1.21                          | ( 1.10 - 1.34 )  | 1.88.E-04 | 1.20                  | ( 1.13 - 1.28 ) | 8.49.E-09 | 0.84     |
| <i>ASB3</i>        | 2   | rs9309245   | <b>G</b>    | C               | 1.08                        | ( 1.03 - 1.13 ) | 1.06.E-03 | 1.14                          | ( 1.07 - 1.21 )  | 3.15.E-05 | 1.10                  | ( 1.06 - 1.14 ) | 2.67.E-07 | 0.21     |
| <i>ATP8B2</i>      | 1   | rs67156297  | <b>A</b>    | G               | 1.19                        | ( 1.12 - 1.27 ) | 3.98.E-08 | 1.08                          | ( 0.996 - 1.17 ) | 6.13.E-02 | 1.15                  | ( 1.09 - 1.21 ) | 4.13.E-08 | 0.06     |
| <i>MIR4686</i>     | 11  | rs7107784   | <b>G</b>    | A               | 1.11                        | ( 1.04 - 1.18 ) | 2.29.E-03 | 1.21                          | ( 1.11 - 1.32 )  | 9.65.E-06 | 1.14                  | ( 1.09 - 1.21 ) | 3.21.E-07 | 0.10     |
| <i>INAFM2</i>      | 15  | rs67839313  | <b>C</b>    | T               | 1.10                        | ( 1.05 - 1.14 ) | 8.41.E-06 | 1.07                          | ( 1.01 - 1.13 )  | 1.43.E-02 | 1.09                  | ( 1.05 - 1.12 ) | 5.33.E-07 | 0.42     |

Chr:chromosome

Risk allele: risk allele in the present Japanese study.

non-risk allele: alternative allele in the present Japanese study.

OR: odds ratio

95%CI: 95% confidence interval

P-value: p-value for association with type 2 diabetes

P-for hetero: p-values of Cochran's Q-test for heterogeneity

All association data are adjusted for age, sex and loge-transformed BMI

This analysis includes participants whose clinical information for age, sex and BMI are complete (total n= 50,768)

male ; total Case n = 13,937, Control n = 14,956 Stage-1, set-1: Case n = 5,749, Control n = 3,302, Stage-1, set-2: Case n = 3,823, Control n = 9,164, Stage-2 Case n = 4,365, Control n = 2,490

female ; total Case n = 7,799, Control n = 14,076 Stage-1, set-1: Case n = 3,303, Control n = 2,375, Stage-1, set-2: Case n = 1,759, Control n = 8,938, Stage-2 Case n = 2,737, Control n = 2,763

Supplementary Table15. Association of *ADCY5*, *PRC1* and *HNF1A* with type 2 diabetes in the Japanese populations

| <i>locus</i> | Chr. | SNP        | Allele |          | Study           | Risk Allele Frequency |         |                | Association for type 2 diabetes |                        |           | Meta analysis     |              |
|--------------|------|------------|--------|----------|-----------------|-----------------------|---------|----------------|---------------------------------|------------------------|-----------|-------------------|--------------|
|              |      |            | Risk   | Non-risk |                 | Case                  | Control | R <sup>2</sup> | OR                              | 95%CI                  | p-value   | p-for association | p-for hetero |
| <i>PRC1</i>  | 15   | rs79548680 | C      | G        | Stage-1, set-1  | 0.494                 | 0.476   | 0.906          | 1.09                            | ( 1.04 - 1.14 )        | 4.11.E-04 |                   |              |
|              |      |            |        |          | Stage-1, set-2  | 0.490                 | 0.475   | 0.903          | 1.07                            | ( 1.02 - 1.11 )        | 4.50.E-03 |                   |              |
|              |      |            |        |          | Stage-2         | 0.501                 | 0.482   |                | 1.08                            | ( 1.03 - 1.13 )        | 2.40.E-03 |                   |              |
|              |      |            |        |          | <b>combined</b> |                       |         |                | <b>1.08</b>                     | <b>( 1.05 - 1.11 )</b> |           | <b>3.64E-08</b>   | <b>0.83</b>  |
| <i>ADCY5</i> | 3    | rs79223353 | G      | A        | Stage-1, set-1  | 0.656                 | 0.636   | 0.837          | 1.11                            | ( 1.05 - 1.16 )        | 5.93.E-05 |                   |              |
|              |      |            |        |          | Stage-1, set-2  | 0.649                 | 0.638   | 0.811          | 1.06                            | ( 1.01 - 1.11 )        | 1.87.E-02 |                   |              |
|              |      |            |        |          | Stage-2         | 0.671                 | 0.652   |                | 1.09                            | ( 1.03 - 1.15 )        | 1.70.E-03 |                   |              |
|              |      |            |        |          | <b>combined</b> |                       |         |                | <b>1.08</b>                     | <b>( 1.05 - 1.12 )</b> |           | <b>4.20E-08</b>   | <b>0.47</b>  |
| <i>HNF1A</i> | 12   | rs55783344 | T      | C        | Stage-1, set-1  | 0.239                 | 0.222   | 0.991          | 1.10                            | ( 1.04 - 1.16 )        | 4.30.E-04 |                   |              |
|              |      |            |        |          | Stage-1, set-2  | 0.237                 | 0.228   | 0.988          | 1.05                            | ( 1.00 - 1.10 )        | 4.55.E-02 |                   |              |
|              |      |            |        |          | Stage-2         | 0.239                 | 0.226   |                | 1.08                            | ( 1.02 - 1.14 )        | 1.36.E-02 |                   |              |
|              |      |            |        |          | <b>combined</b> |                       |         |                | <b>1.07</b>                     | <b>( 1.04 - 1.11 )</b> |           | <b>5.18E-06</b>   | <b>0.49</b>  |

Chr:chromosome

Risk: risk allele in the present Japanese study.

non-risk: alternative allele in the present Japanese study.

R<sup>2</sup>: r-square value for the imputation accuracy

OR: odds ratio

95%CI: 95% confidence interval

P-for hetero: p-values of Cochran's Q-test for heterogeneity

Supplementary Table 16. Conditional analysis for *IDE-HHEX* locus in the Japanese populations

| SNP ID     | Covariates | CHR | POS (Build37) | Risk | Non-risk |                 | CASE<br>RAF | CTRL<br>RAF | R <sup>2</sup> | OR          | 95%CI                  | P-value          | P-het |
|------------|------------|-----|---------------|------|----------|-----------------|-------------|-------------|----------------|-------------|------------------------|------------------|-------|
| rs78627331 | -          | 10  | 94,812,254    | C    | A        | Stage-1, set-1  | 0.042       | 0.030       | 0.89           | 1.43        | ( 1.26 - 1.62 )        | 2.10.E-08        |       |
|            |            |     |               |      |          | Stage-1, set-2  | 0.039       | 0.032       | 0.84           | 1.25        | ( 1.11 - 1.42 )        | 3.08.E-04        |       |
|            |            |     |               |      |          | Stage-2         | 0.043       | 0.032       |                | 1.33        | ( 1.16 - 1.52 )        | 3.19.E-05        |       |
|            |            |     |               |      |          | <b>combined</b> |             |             |                | <b>1.33</b> | <b>( 1.24 - 1.44 )</b> | <b>1.65.E-14</b> | 0.34  |
| rs78627331 | rs1111875  | 10  | 94,812,254    | C    | A        | Stage-1, set-1  | 0.042       | 0.030       | 0.89           | 1.33        | ( 1.16 - 1.51 )        | 1.69.E-05        |       |
|            |            |     |               |      |          | Stage-1, set-2  | 0.039       | 0.032       | 0.84           | 1.17        | ( 1.03 - 1.32 )        | 1.67.E-02        |       |
|            |            |     |               |      |          | Stage-2         | 0.043       | 0.032       |                | 1.21        | ( 1.07 - 1.38 )        | 1.33.E-03        |       |
|            |            |     |               |      |          | <b>combined</b> |             |             |                | <b>1.24</b> | <b>( 1.15 - 1.34 )</b> | <b>1.49.E-08</b> | 0.37  |
| rs34773007 | -          | 10  | 94,658,207    | A    | G        | Stage-1, set-1  | 0.052       | 0.039       | 0.99           | 1.36        | ( 1.22 - 1.51 )        | 1.59.E-08        |       |
|            |            |     |               |      |          | Stage-1, set-2  | 0.046       | 0.040       | 0.98           | 1.18        | ( 1.07 - 1.31 )        | 1.50.E-03        |       |
|            |            |     |               |      |          | Stage-2         | 0.049       | 0.037       |                | 1.35        | ( 1.19 - 1.53 )        | 3.89.E-06        |       |
|            |            |     |               |      |          | <b>combined</b> |             |             |                | <b>1.28</b> | <b>( 1.20 - 1.37 )</b> | <b>1.72.E-14</b> | 0.13  |
| rs34773007 | rs1111875  | 10  | 94,658,207    | A    | G        | Stage-1, set-1  | 0.052       | 0.039       | 0.99           | 1.28        | ( 1.14 - 1.43 )        | 1.60.E-05        |       |
|            |            |     |               |      |          | Stage-1, set-2  | 0.046       | 0.040       | 0.98           | 1.11        | ( 1.00 - 1.23 )        | 5.86.E-02        |       |
|            |            |     |               |      |          | Stage-2         | 0.049       | 0.037       |                | 1.28        | ( 1.12 - 1.46 )        | 2.23.E-04        |       |
|            |            |     |               |      |          | <b>combined</b> |             |             |                | <b>1.21</b> | <b>( 1.13 - 1.29 )</b> | <b>2.20.E-08</b> | 0.13  |

RAF; risk allele frequency, R<sup>2</sup>; r-square value for imputation accuracy, OR; odds ratio, 95%CI; 95% confidence interval

P-het; P-value of Cochran's Q-test for heterogeneity

Stage-1, set-1; 9,817 cases and 6,763 controls, imputed

Stage-1, set-2; 5,646 cases and 19,420 controls, imputed

Stage-2; 7,802 cases and 5,090 controls for rs78627331, 7,752 cases and 5,038 controls for rs34773007, *de novo* typed



Supplementary Table 17. Missense variant genes

| T2D risk SNP           |            | LD    |     | gene     | Missense variants               |
|------------------------|------------|-------|-----|----------|---------------------------------|
| Lead SNP               | population | $r^2$ |     |          |                                 |
| rs780094               | European   | 0.906 | CEU | GCKR     | Leu446Pro                       |
| rs10203174             | European   | 1     | CEU | THADA    | Thr1187Ala                      |
| rs1801282              | European   | 1     | CEU | PPARG    | Pro12Ala                        |
| rs4458523              | European   | 0.881 | CEU | WFS1     | Arg611His                       |
| rs35658696             | European   | 1     | CEU | PAM      | Asp563Gly                       |
| rs115801775            | Japanese   | 1     | CEU | PPIP5K2  | Ser1228Gly                      |
|                        |            | 1     | JPT | CCHCR1   | Arg155Gln                       |
|                        |            | 0.817 | JPT | PSORS1C1 | Pro133Leu                       |
|                        |            | 0.95  | JPT | CDSN     | Ser453Asn                       |
|                        |            | 0.95  | JPT | C6orf15  | Val5Met                         |
| rs3130501(rs115164593) | European   | 1     | CEU | TCF19    | Met211Val                       |
| rs1535500              | East Asian | 1     | JPT | KCNK16   | Ala277Glu, Pro254His            |
| rs13266634             | Japanese   | 1     | JPT | KCNK17   | Ser21Gly                        |
|                        |            | 1     | JPT | SLC30A8  | Arg276Trp                       |
| rs28642252             | Japanese   | 0.946 | JPT | GPSM1    | Ser391Leu                       |
| rs5215                 | European   | 1     | CEU | KCNJ11   | Val337Ile, Lys23Glu             |
|                        |            | 0.95  | CEU | ABCC8    | Ala1369Ser                      |
| rs391300               | Chinese    | 1     | CHB | SMG6     | Ala972Thr                       |
| rs75418188             | Japanese   | 1     | JPT | SLC16A11 | Gly340Ser, Pro443Thr, Val113Ile |
| rs10401969             | European   | 1     | CEU | TM6SF2   | Glu167Lys                       |

$r^2$ ;  $r$ -square value for Linkage Disequilibrium between T2D risk SNP and missense variants

Genes include missense variants, which were in linkage disequilibrium ( $r^2 \geq 0.80$ ) to T2D risk lead SNPs, were listed.

Supplementary Table 18. A list of monogenic diabetes genes

| 1) pancreatic $\beta$ -cell function |                                                 | 2) Insulin resistance |                                 |
|--------------------------------------|-------------------------------------------------|-----------------------|---------------------------------|
| <i>gene</i>                          | <i>type</i>                                     | <i>gene</i>           | <i>type</i>                     |
| <b>ABCC8</b>                         | PNDM                                            | <i>AGPAT2</i>         | CGL                             |
| <i>BLK</i>                           | MODY11                                          | <i>AKT2</i>           | FPL, insulin signalling defects |
| <i>CEL</i>                           | MODY8                                           | <i>ALMS1</i>          | Astrom synd                     |
| <i>CISD2</i>                         | Wolfram syndrome (w/o insipidus)                | <i>BLM</i>            | Bloom synd                      |
| <i>EIF2AK3</i>                       | PNDM                                            | <i>BSCL2</i>          | CGL                             |
| <i>GATA4</i>                         | pancreatic agenesis                             | <i>CAV1</i>           | CGL                             |
| <i>GATA6</i>                         | pancreatic agenesis                             | <i>CIDEC</i>          | FPL                             |
| <b>GCK</b>                           | MODY2, PNDM                                     | <i>INSR</i>           | Type A insulin resistance       |
| <b>GLIS3</b>                         | PNDM                                            | <b>LEP</b>            | SEO                             |
| <b>HNF1A</b>                         | MODY3, PNDM                                     | <i>LMNA</i>           | FPL                             |
| <b>HNF1B</b>                         | MODY5, PNDM                                     | <i>MC4R</i>           | SEO                             |
| <b>HNF4A</b>                         | MODY1, PNDM                                     | <i>PCNT</i>           | MOPDII                          |
| <i>IER3IP1</i>                       | PNDM                                            | <i>PLIN1</i>          | FPL                             |
| <i>INS</i>                           | MODY10, PNDM, TNDM                              | <i>POMC</i>           | SEO                             |
| <b>KCNJ11</b>                        | PNDM                                            | <b>PPARG</b>          | FPL, insulin signalling defects |
| <i>KLF11</i>                         | MODY7, PNDM                                     | <i>PPP1R3A</i>        | insulin signalling defects      |
| <i>MNX1</i>                          | PNDM                                            | <i>PTRF</i>           | CGL                             |
| <i>NEUROD1</i>                       | MODY6, PNDM                                     | <i>SH2B1</i>          | SEO                             |
| <i>NGN3</i>                          | PNDM                                            | <i>TBC1D4</i>         | insulin signalling defects      |
| <b>PAX4</b>                          | MODY9, PNDM                                     | <i>WRN</i>            | Werner synd                     |
| <i>PAX6</i>                          | PNDM                                            | <i>ZMPSTE24</i>       | FPL                             |
| <i>PDX1/IPF1</i>                     | MODY4, PNDM                                     | <i>DMPK</i>           | Myotonic dystrophy              |
| <i>PTF1A</i>                         | pancreatic agenesis                             |                       |                                 |
| <i>RFX6</i>                          | PNDM                                            |                       |                                 |
| <i>SLC19A2</i>                       | PNDM                                            |                       |                                 |
| <i>SLC29A3</i>                       | autoantibody negative insulin dependet diabetes |                       |                                 |
| <i>SLC2A2</i>                        | PNDM(fanconi Bickel syndrome), TNDM             |                       |                                 |
| <b>WFS1</b>                          | Wolfram syndrome                                |                       |                                 |
| <i>PLAGL1</i>                        | TNDM                                            |                       |                                 |
| <i>ZFP57</i>                         | TNDM                                            |                       |                                 |

PNDM; Permanent neonatal diabetes mellitus

TNDM; Transient neonatal diabetes mellitus

MODY; Maturity onset diabetes of the young

CGL; Generalized lipodystrophy

FPL; Familial partial lipodystrophy

SEO; severe obesity

Eleven genes annotated as monogenic diabetes genes (see supplementary information) are indicated by bold letters

Supplementary Table 19. Overlap of T2D risk genes with mouse phenotypes

| knockout mouse phenotype category         | No. knockout mouse genes with human ortholog | No. overlap with T2D genes | P-value        |
|-------------------------------------------|----------------------------------------------|----------------------------|----------------|
| <b>liver/biliary system phenotype</b>     | <b>1004</b>                                  | <b>21</b>                  | <b>0.00022</b> |
| <b>homeostasis/metabolism phenotype</b>   | <b>3475</b>                                  | <b>52</b>                  | <b>0.00052</b> |
| <b>endocrine/exocrine gland phenotype</b> | <b>1480</b>                                  | <b>27</b>                  | <b>0.00055</b> |
| <b>embryogenesis phenotype</b>            | <b>1518</b>                                  | <b>27</b>                  | <b>0.00091</b> |
| <b>mortality/aging</b>                    | <b>4023</b>                                  | <b>57</b>                  | <b>0.0013</b>  |
| <b>growth/size/body phenotype</b>         | <b>3163</b>                                  | <b>47</b>                  | <b>0.0013</b>  |
| renal/urinary system phenotype            | 1017                                         | 19                         | 0.0030         |
| cardiovascular system phenotype           | 2021                                         | 31                         | 0.0069         |
| digestive/alimentary phenotype            | 1155                                         | 19                         | 0.017          |
| adipose tissue phenotype                  | 656                                          | 12                         | 0.024          |
| normal phenotype                          | 1693                                         | 25                         | 0.028          |
| nervous system phenotype                  | 2840                                         | 37                         | 0.055          |
| muscle phenotype                          | 1234                                         | 18                         | 0.075          |
| integument phenotype                      | 1522                                         | 21                         | 0.10           |
| taste/olfaction phenotype                 | 125                                          | 3                          | 0.11           |
| behavior/neurological phenotype           | 2478                                         | 29                         | 0.29           |
| craniofacial phenotype                    | 1010                                         | 13                         | 0.30           |
| vision/eye phenotype                      | 1197                                         | 15                         | 0.32           |
| limbs/digits/tail phenotype               | 774                                          | 5                          | 0.34           |
| respiratory system phenotype              | 1158                                         | 14                         | 0.41           |
| pigmentation phenotype                    | 362                                          | 5                          | 0.43           |
| tumorigenesis                             | 805                                          | 10                         | 0.44           |
| cellular phenotype                        | 2825                                         | 31                         | 0.48           |
| immune system phenotype                   | 2667                                         | 28                         | 0.68           |
| other phenotype                           | 274                                          | 3                          | 0.84           |
| hematopoietic system phenotype            | 2475                                         | 25                         | 0.86           |
| skeleton phenotype                        | 1494                                         | 14                         | 0.87           |
| reproductive system phenotype             | 1581                                         | 15                         | 0.90           |
| hearing/vestibular/ear phenotype          | 529                                          | 5                          | 0.94           |

Out of 286 T2D biological candidate genes, 169 mouse orthologs existed in the database. Overlap with 169 genes implicated in knockout mouse phenotypes (categorized in 29 phenotypes) was evaluated. Knockout mouse phenotypes that satisfied significant enrichment with T2D risk genes are indicated in bold (P for chi-square test < 0.05/29 = 0.0017)

Supplementary Table 20. Pubmed text-mining

| <i>GENE</i>    | GRAIL p-value |
|----------------|---------------|
| <i>GCK</i>     | 1.9.E-09      |
| <i>GCKR</i>    | 4.4.E-08      |
| <i>HNF1A</i>   | 8.2.E-08      |
| <i>PAX4</i>    | 1.4.E-07      |
| <i>HNF1B</i>   | 2.7.E-06      |
| <i>HNF4A</i>   | 7.8.E-06      |
| <i>GIPR</i>    | 1.6.E-05      |
| <i>NOTCH1</i>  | 9.1.E-04      |
| <i>NOTCH2</i>  | 1.3.E-03      |
| <i>TLE1</i>    | 1.9.E-03      |
| <i>ABCC8</i>   | 2.1.E-03      |
| <i>CCNE2</i>   | 3.2.E-03      |
| <i>TCF7L2</i>  | 5.1.E-03      |
| <i>FAH</i>     | 7.6.E-03      |
| <i>WFS1</i>    | 7.6.E-03      |
| <i>HHEX</i>    | 1.2.E-02      |
| <i>KCNJ11</i>  | 1.2.E-02      |
| <i>CDK2AP1</i> | 1.3.E-02      |
| <i>SBNO1</i>   | 1.5.E-02      |
| <i>CCND2</i>   | 1.5.E-02      |
| <i>POU5F1</i>  | 1.6.E-02      |
| <i>GLIS3</i>   | 2.2.E-02      |
| <i>ARL15</i>   | 2.4.E-02      |
| <i>LEP</i>     | 2.5.E-02      |
| <i>PPARG</i>   | 3.2.E-02      |
| <i>SYN2</i>    | 3.2.E-02      |
| <i>THADA</i>   | 3.7.E-02      |
| <i>PAM</i>     | 4.2.E-02      |
| <i>HKDC1</i>   | 4.4.E-02      |
| <i>FBXW7</i>   | 4.6.E-02      |

Keywords Describing Functional Connections

'diabetes', 'notch', 'glucose', 'cyclin', 'pancreatic', 'insulin', 'beta', 'hepatocyte', 'mutations', 'leptin', 'type', 'repressor', 'pancreas', 'laminin', 'mice', 'transcription', 'differentiation', 'development',

A list of genes prioritized by PubMed text mining using GRAIL with gene-based  $p < 0.05$ , to search for text similarity in PubMed abstracts (connectivity) across the 286 T2D risk genes

Supplementary Table 21. A list of direct interaction between T2D biological genes and drug target genes

| biological T2D genes | drug target genes which interact with T2D genes |
|----------------------|-------------------------------------------------|
| ABCC8                | KCNJ8                                           |
| ABCC8                | KCNJ11                                          |
| GCK                  | None                                            |
| KCNJ11               | KCNJ8                                           |
| KCNJ11               | ABCC8                                           |
| KIF11                | AURKA                                           |
| KIF11                | IKBKE                                           |
| PPARG                | HDAC3                                           |
| PPARG                | HDAC4                                           |
| PPARG                | MAPK1                                           |
| PPARG                | MAPK8                                           |
| PPARG                | RXRA                                            |
| PPARG                | RXRG                                            |
| NOTCH2               | GSK3B                                           |
| NOTCH1               | GSK3B                                           |
| CCND2                | GSK3B                                           |
| FBXW7                | JUN                                             |
| HHEX                 | JUN                                             |
| CCND2                | JUN                                             |
| NOTCH2               | ADAM17                                          |
| NOTCH1               | ADAM17                                          |
| CCNE2                | CDK2                                            |
| CCND2                | CDK2                                            |
| TCF7L2               | CDK6                                            |
| CCND2                | CDK6                                            |
| SYN2                 | HSPA8                                           |
| NOTCH1               | HSPA8                                           |
| LEP                  | STAT3                                           |
| HNF1A                | STAT3                                           |
| TP53INP1             | TP53                                            |
| HNF4A                | TP53                                            |
| NOTCH1               | ABL2                                            |
| HNF1A                | ALB                                             |
| POU5F1               | AR                                              |
| HNF1A                | CACNA1A                                         |
| HNF1A                | CALM1                                           |
| HNF1A                | CALM2                                           |
| HNF1A                | CALM3                                           |
| CCND2                | CCND1                                           |
| CCND2                | CDK4                                            |
| LEP                  | CLU                                             |
| LEP                  | CNTFR                                           |
| LEP                  | CRP                                             |
| NOTCH1               | CSF1                                            |
| LEP                  | CSF2RA                                          |
| LEP                  | CSF2RB                                          |
| LEP                  | CSF3R                                           |
| LEP                  | EPOR                                            |
| NOTCH1               | ERBB3                                           |
| HNF4A                | ESR1                                            |
| GCKR                 | GCK                                             |
| LEP                  | GHR                                             |
| HNF1A                | HDAC9                                           |
| NOTCH1               | HIF1A                                           |

|        |           |
|--------|-----------|
| LEP    | IFNAR1    |
| LEP    | IFNAR2    |
| LEP    | IFNGR1    |
| LEP    | IFNGR2    |
| SSR1   | IKBKE     |
| LEP    | IL11RA    |
| LEP    | IL2RA     |
| LEP    | IL2RB     |
| LEP    | IL2RG     |
| LEP    | IL3RA     |
| LEP    | IL4R      |
| LEP    | IL5RA     |
| LEP    | IL6R      |
| LEP    | IL6ST     |
| LEP    | IL7R      |
| ANK1   | ITPR3     |
| CCND2  | KCNMA1    |
| NOTCH1 | LCK       |
| HNF4A  | MAPK14    |
| LEP    | MPL       |
| PPM1G  | MTNR1B    |
| FBXW7  | MYC       |
| NOTCH1 | NFKB1     |
| FBXW7  | NFKB2     |
| TCF7L2 | PARP1     |
| SYN2   | PDE1A     |
| SYN2   | PDE1B     |
| NOTCH1 | PIK3CG    |
| PAM    | PRKCA     |
| LEP    | PRLR      |
| NOTCH1 | PSMB1     |
| CCND2  | PYGM      |
| SSR1   | SERPINA1  |
| HNF1A  | SMO       |
| HNF1A  | SRC       |
| SYN2   | SV2A      |
| CCND2  | TGM2      |
| CCND2  | TNFRSF10B |
| NOTCH1 | WEE1      |
| NOTCH1 | XIAP      |

---

Red letters indicate drug targeted genes.

Supplementary Table 22 Target genes of approved T2D drug

| <u>Anti-Diabetic agents category</u> | <u>Target genes</u>         |
|--------------------------------------|-----------------------------|
| insulin analog                       | <i>INSR</i>                 |
| human insulin                        | <i>INSR</i>                 |
| 1st generation SU                    | <i>ABCC8, KCNJ1</i>         |
| 2nd generation SU                    | <i>ABCC8, KCNJ8</i>         |
| 3rd generation SU                    | <i>ABCC8, KCNJ1, KCNJ11</i> |
| rapid insulin secretagogue           | <i>ABCC8</i>                |
| Biguanide                            | <i>PRKAB1</i>               |
| alpha-glucosidase inhibitor          | <i>MGAM, AMY2A, SI, GAA</i> |
| Thiazolidines                        | <i>PPARG</i>                |
| DPP-4 inhibitor                      | <i>DPP4</i>                 |
| GLP-1 analog                         | <i>GLP1R</i>                |
| SGLT2 inhibitor                      | <i>SLC5A2</i>               |

Drug target genes manually extracted for genes with approved T2D drugs in Japan in June 2014 by searching DrugBank (<http://www.drugbank.ca/>)

Supplementary Table23. A list for biological T2D genes and their targeted drugs

| Targeted genes | Targeted drugs*              | Status*                 | Diseases*                                                                         |
|----------------|------------------------------|-------------------------|-----------------------------------------------------------------------------------|
| <b>GCK</b>     | activators                   | AMG 151                 | Phase II Type 2 diabetes                                                          |
|                |                              | AZD1656                 | Phase II Type 2 diabetes                                                          |
|                |                              | R7201                   | Phase II Type 2 diabetes                                                          |
|                |                              | GK1-399                 | Phase I/II Type 2 diabetes                                                        |
|                |                              | AZD6370                 | Phase I Type 2 diabetes                                                           |
|                |                              | AZD5658                 | Phase I Obesity, diabetes                                                         |
|                |                              | DS-7309                 | Phase I Diabetes                                                                  |
|                |                              | PSN-101                 | Phase I Diabetes Mellitus Type 1 and 2                                            |
|                |                              | TAK-329                 | Phase I Diabetes/Type1 diabetes                                                   |
|                | TTP355                       | Phase I Type 2 diabetes |                                                                                   |
| inhibitors     | Beta-D-Glucose<br>Lonidamine |                         |                                                                                   |
| <b>KIF11</b>   | activators                   | N/A                     |                                                                                   |
|                | inhibitors                   | Ispinesib               | Phase II Lung Cancer                                                              |
|                |                              | Ispinesib               | Phase II Head and Neck Cancer, Renal Cell Carcinoma, Ovarian Cancer, Solid Tumors |
|                |                              | Ispinesib               | Phase I Pediatric                                                                 |
|                |                              | SB-743921               | Phase I/II Non-Hodgkin's Lymphoma, Cancer/Tumors                                  |
|                |                              | 4SC-205                 | Phase I Solid tumour and malignant lymphoma                                       |
|                |                              | ARQ 621                 | Phase I Hematological malignancies                                                |
|                |                              | ARQ 621                 | Phase I Late-stage solid tumors                                                   |
|                |                              | ARRY-520                | Phase I Cancer/Tumors                                                             |
| BQS481         | Phase I Solid Tumors         |                         |                                                                                   |
| <b>GSK3B</b>   | activators                   | N/A                     |                                                                                   |
|                | inhibitors                   | Enzastaurin             | Phase III Non Hodgkin Lymphoma                                                    |
|                |                              | Enzastaurin             | Phase II Glioblastoma Multiforme                                                  |
|                |                              | LY2090314               | Phase II AML APL                                                                  |
|                |                              | Enzastaurin             | Phase I Brain and Central Nervous System Tumors                                   |
| <b>JUN</b>     | activators                   | N/A                     |                                                                                   |
|                | inhibitors                   | T-5224                  | Phase I Rheumatoid Arthritis                                                      |

\* Status in Aug 2014 by searching Therapeutic Target Database (<http://bidd.nus.edu.sg/group/cjttd/>)



Supplementary Table 24. Clinical Characteristics of the present study

|                  | Stage1, set-1 |             | Stage1, set-2 |             | Stage2      |             |
|------------------|---------------|-------------|---------------|-------------|-------------|-------------|
|                  | T2D           | Control     | T2D           | Control     | T2D         | Control     |
|                  | n = 9,817     | n = 6,763   | n = 5,646     | n = 19,420  | n = 7,936   | n = 5,539   |
| male (%)         | 63.5          | 58.2        | 68.5          | 50.6        | 61.0        | 47.1        |
| age <sup>a</sup> | 65.7 ± 10.0   | 61.1 ± 11.3 | 66.1 ± 9.7    | 64.2 ± 10.7 | 64.1 ± 11.1 | 54.9 ± 16.8 |
| BMI <sup>a</sup> | 23.8 ± 3.8    | 22.4 ± 3.6  | 23.9 ± 3.8    | 22.5 ± 3.40 | 24.1 ± 3.9  | 22.4 ± 3.6  |

<sup>a</sup> Data are means ± S.D.

Supp Table 25. Direct comparison of effect sizes of novel and established T2D loci between Japanese and Europeans

| Locus          | Original GWAS  | Lead SNPs   | Alleles |          | Japanese**<br>14,463 cases and 26,183 controls |      |                 |           | European***<br>12,171 cases and 56,862 controls |      |                 |           | Heterogeneity<br>of the effect |                        |
|----------------|----------------|-------------|---------|----------|------------------------------------------------|------|-----------------|-----------|-------------------------------------------------|------|-----------------|-----------|--------------------------------|------------------------|
|                |                |             | Risk    | non-risk | RAF                                            | OR   | 95%CI           | p-value   | RAF                                             | OR   | 95%CI           | p-value   | Direction                      | Cochran's<br>Q p-value |
| MIR129-LEP     | Japanese       | rs4731420   | C       | G        | 0.09                                           | 1.16 | ( 1.10 - 1.22 ) | 7.90.E-08 | 0.17                                            | 0.99 | ( 0.95 - 1.04 ) | 7.60.E-01 | +                              | 1.14.E-05              |
| TSPAN8/LGR5    | European       | rs7955901   | C       | T        | 0.72                                           | 0.98 | ( 0.95 - 1.01 ) | 2.55.E-01 | 0.40                                            | 1.09 | ( 1.05 - 1.13 ) | 3.20.E-06 | +                              | 2.40.E-05              |
| BCAR1          | European       | rs7202877   | T       | G        | 0.79                                           | 0.99 | ( 0.95 - 1.03 ) | 5.68.E-01 | 0.90                                            | 1.15 | ( 1.08 - 1.22 ) | 2.30.E-05 | +                              | 3.39.E-05              |
| CCDC85A        | Japanese novel | rs1116357   | G       | A        | 0.28                                           | 1.11 | ( 1.07 - 1.15 ) | 6.88.E-10 | 0.57                                            | 1.01 | ( 0.98 - 1.05 ) | 4.70.E-01 | ++                             | 1.09.E-04              |
| ASB3           | Japanese novel | rs9309245   | G       | C        | 0.17                                           | 1.12 | ( 1.08 - 1.17 ) | 3.23.E-08 | 0.37                                            | 1.01 | ( 0.98 - 1.05 ) | 5.00.E-01 | ++                             | 1.33.E-04              |
| MIR4686        | Japanese novel | rs7107784*  | G       | A        | 0.08                                           | 1.17 | ( 1.10 - 1.24 ) | 5.78.E-08 | 0.31                                            | 1.02 | ( 0.97 - 1.07 ) | 3.90.E-01 | ++                             | 3.71.E-04              |
| HMG2           | European       | rs2261181   | T       | C        | 0.12                                           | 1.03 | ( 0.98 - 1.07 ) | 2.26.E-01 | 0.10                                            | 1.16 | ( 1.10 - 1.23 ) | 1.00.E-07 | ++                             | 8.73.E-04              |
| RBMS1          | European       | rs7569522   | A       | G        | 0.38                                           | 0.99 | ( 0.96 - 1.02 ) | 5.14.E-01 | 0.50                                            | 1.07 | ( 1.04 - 1.11 ) | 2.50.E-05 | +                              | 9.06.E-04              |
| ATP8B2         | Japanese novel | rs67156297* | A       | G        | 0.10                                           | 1.16 | ( 1.10 - 1.23 ) | 1.44.E-08 | 0.24                                            | 1.04 | ( 0.99 - 1.08 ) | 9.10.E-02 | ++                             | 1.17.E-03              |
| SSR1-RREB1     | Trans ethnic   | rs9505118   | A       | G        | 0.62                                           | 1.00 | ( 0.97 - 1.03 ) | 8.46.E-01 | 0.60                                            | 1.08 | ( 1.05 - 1.12 ) | 6.10.E-06 | ++                             | 1.25.E-03              |
| KCNQ1 int15    | Japanese       | rs2237896   | G       | A        | 0.60                                           | 1.33 | ( 1.28 - 1.37 ) | 2.81.E-70 | 0.94                                            | 1.14 | ( 1.04 - 1.24 ) | 3.70.E-03 | ++                             | 1.54.E-03              |
| GCC1           | East Asian     | rs6467136   | G       | A        | 0.80                                           | 1.07 | ( 1.03 - 1.11 ) | 1.90.E-04 | 0.52                                            | 0.99 | ( 0.95 - 1.02 ) | 5.30.E-01 | +                              | 2.04.E-03              |
| KLFI4          | European       | rs13233731  | G       | A        | 0.70                                           | 1.02 | ( 0.99 - 1.06 ) | 1.55.E-01 | 0.54                                            | 1.10 | ( 1.06 - 1.13 ) | 4.30.E-08 | ++                             | 2.07.E-03              |
| INAFM2         | Japanese novel | rs67839313* | C       | T        | 0.27                                           | 1.09 | ( 1.06 - 1.13 ) | 4.79.E-07 | 0.11                                            | 1.01 | ( 0.97 - 1.06 ) | 5.30.E-01 | ++                             | 5.94.E-03              |
| MTNR1B         | European       | rs10830963  | G       | C        | 0.44                                           | 1.03 | ( 1.00 - 1.07 ) | 8.22.E-02 | 0.26                                            | 1.11 | ( 1.07 - 1.16 ) | 7.30.E-07 | ++                             | 6.25.E-03              |
| DGKB           | European       | rs17168486  | T       | C        | 0.39                                           | 1.05 | ( 1.02 - 1.08 ) | 2.29.E-03 | 0.17                                            | 1.13 | ( 1.08 - 1.18 ) | 6.90.E-07 | ++                             | 7.61.E-03              |
| CLIP2          | European       | rs10401969  | C       | T        | 0.10                                           | 1.01 | ( 0.96 - 1.06 ) | 8.12.E-01 | 0.10                                            | 1.13 | ( 1.05 - 1.21 ) | 5.40.E-04 | ++                             | 8.99.E-03              |
| ANK1           | Japanese       | rs12549902  | A       | G        | 0.52                                           | 1.11 | ( 1.08 - 1.15 ) | 1.28.E-12 | 0.63                                            | 1.05 | ( 1.02 - 1.09 ) | 3.00.E-03 | ++                             | 9.48.E-03              |
| KCNK16         | East Asian     | rs1535500*  | T       | G        | 0.37                                           | 1.07 | ( 1.04 - 1.10 ) | 1.68.E-05 | 0.49                                            | 1.01 | ( 0.98 - 1.05 ) | 4.70.E-01 | ++                             | 1.37.E-02              |
| ZBED3          | European       | rs6878122   | G       | A        | 0.02                                           | 0.98 | ( 0.88 - 1.09 ) | 6.80.E-01 | 0.30                                            | 1.13 | ( 1.07 - 1.18 ) | 1.20.E-06 | +                              | 1.76.E-02              |
| RASGRP1        | Chinese        | rs7403531   | T       | C        | 0.47                                           | 0.96 | ( 0.93 - 0.99 ) | 1.36.E-02 | 0.28                                            | 1.02 | ( 0.98 - 1.06 ) | 3.60.E-01 | +                              | 2.26.E-02              |
| ZFAND3         | East Asian     | rs9470794   | C       | T        | 0.22                                           | 1.08 | ( 1.04 - 1.12 ) | 8.11.E-05 | 0.12                                            | 0.99 | ( 0.93 - 1.05 ) | 8.00.E-01 | +                              | 2.30.E-02              |
| ZFAND6         | European       | rs11634397  | G       | A        | 0.09                                           | 1.02 | ( 0.97 - 1.07 ) | 5.05.E-01 | 0.66                                            | 1.09 | ( 1.05 - 1.13 ) | 7.30.E-06 | ++                             | 2.48.E-02              |
| BCL11A         | European       | rs243088    | T       | A        | 0.67                                           | 1.03 | ( 1.00 - 1.07 ) | 4.33.E-02 | 0.50                                            | 1.09 | ( 1.05 - 1.13 ) | 1.00.E-05 | ++                             | 3.55.E-02              |
| ANKRD55        | European       | rs459193    | G       | A        | 0.52                                           | 1.11 | ( 1.07 - 1.14 ) | 1.04.E-10 | 0.74                                            | 1.05 | ( 1.01 - 1.09 ) | 2.10.E-02 | ++                             | 3.79.E-02              |
| LAMA-1         | European       | rs8090011   | G       | C        | 0.71                                           | 1.02 | ( 0.98 - 1.05 ) | 3.04.E-01 | 0.39                                            | 1.07 | ( 1.03 - 1.11 ) | 1.20.E-03 | ++                             | 5.30.E-02              |
| ADAMTS9        | European       | rs6795735   | C       | T        | 0.18                                           | 1.02 | ( 0.98 - 1.06 ) | 3.40.E-01 | 0.52                                            | 1.07 | ( 1.03 - 1.10 ) | 2.30.E-04 | ++                             | 7.42.E-02              |
| DUSP8          | European       | rs2334499   | T       | C        | 0.80                                           | 1.02 | ( 0.98 - 1.06 ) | 2.70.E-01 | 0.46                                            | 1.07 | ( 1.03 - 1.11 ) | 7.30.E-04 | ++                             | 8.37.E-02              |
| GRB14          | South Asian    | rs3923113   | A       | C        | 0.91                                           | 1.10 | ( 1.04 - 1.17 ) | 7.59.E-04 | 0.59                                            | 1.04 | ( 1.00 - 1.08 ) | 3.10.E-02 | ++                             | 9.50.E-02              |
| PROX1          | European       | rs2075423   | G       | T        | 0.87                                           | 1.03 | ( 0.98 - 1.08 ) | 2.40.E-01 | 0.66                                            | 1.08 | ( 1.04 - 1.12 ) | 6.70.E-05 | ++                             | 9.85.E-02              |
| IGF2BP2        | European       | rs4402960   | T       | G        | 0.70                                           | 1.18 | ( 1.14 - 1.21 ) | 1.56.E-22 | 0.69                                            | 1.13 | ( 1.09 - 1.17 ) | 2.70.E-11 | ++                             | 1.03.E-01              |
| UBE2E2         | Japanese       | rs7612463   | C       | A        | 0.86                                           | 1.16 | ( 1.12 - 1.21 ) | 4.30.E-13 | 0.87                                            | 1.10 | ( 1.04 - 1.16 ) | 9.80.E-04 | ++                             | 1.09.E-01              |
| SLC30A8        | European       | rs3802177   | G       | A        | 0.56                                           | 1.11 | ( 1.08 - 1.14 ) | 6.96.E-11 | 0.76                                            | 1.16 | ( 1.11 - 1.22 ) | 2.10.E-11 | ++                             | 1.21.E-01              |
| GCK            | European       | rs10278336  | A       | G        | 0.62                                           | 1.01 | ( 0.98 - 1.04 ) | 5.25.E-01 | 0.57                                            | 1.05 | ( 1.01 - 1.09 ) | 2.00.E-02 | ++                             | 1.35.E-01              |
| PEPD           | East Asian     | rs3786897   | A       | G        | 0.54                                           | 1.06 | ( 1.03 - 1.09 ) | 2.48.E-04 | 0.61                                            | 1.02 | ( 0.98 - 1.06 ) | 3.10.E-01 | ++                             | 1.42.E-01              |
| MPHOSPH9       | Trans ethnic   | rs4275659   | C       | T        | 0.66                                           | 1.02 | ( 0.99 - 1.06 ) | 1.44.E-01 | 0.68                                            | 1.06 | ( 1.03 - 1.10 ) | 8.80.E-04 | ++                             | 1.50.E-01              |
| PRC1           | European       | rs12899811  | G       | A        | 0.99                                           | 0.98 | ( 0.86 - 1.13 ) | 7.98.E-01 | 0.27                                            | 1.09 | ( 1.04 - 1.13 ) | 3.30.E-05 | +                              | 1.54.E-01              |
| TMEM154        | Trans ethnic   | rs6813195   | C       | T        | 0.52                                           | 1.04 | ( 1.01 - 1.08 ) | 7.99.E-03 | 0.70                                            | 1.08 | ( 1.04 - 1.12 ) | 6.10.E-05 | ++                             | 1.55.E-01              |
| KCNJ11         | European       | rs5215      | C       | T        | 0.33                                           | 1.05 | ( 1.01 - 1.08 ) | 4.56.E-03 | 0.38                                            | 1.08 | ( 1.05 - 1.12 ) | 4.40.E-06 | ++                             | 1.64.E-01              |
| TP53INP1       | European       | rs7845219   | T       | C        | 0.31                                           | 1.04 | ( 1.01 - 1.08 ) | 1.70.E-02 | 0.45                                            | 1.08 | ( 1.04 - 1.12 ) | 1.40.E-05 | ++                             | 1.64.E-01              |
| ARAP1 (CENTD2) | European       | rs1552224   | A       | C        | 0.96                                           | 1.21 | ( 1.11 - 1.31 ) | 5.12.E-06 | 0.88                                            | 1.13 | ( 1.08 - 1.19 ) | 4.90.E-07 | ++                             | 1.76.E-01              |
| GCKR           | European       | rs780094    | C       | T        | 0.42                                           | 1.07 | ( 1.04 - 1.11 ) | 2.15.E-06 | 0.59                                            | 1.04 | ( 1.00 - 1.08 ) | 2.50.E-02 | ++                             | 1.87.E-01              |
| FSCN3-PAX4     | Chinese        | rs10229583  | G       | A        | 0.87                                           | 1.10 | ( 1.05 - 1.16 ) | 7.72.E-05 | 0.75                                            | 1.06 | ( 1.02 - 1.10 ) | 2.90.E-03 | ++                             | 2.20.E-01              |
| IRS1           | European       | rs2943640   | C       | A        | 0.94                                           | 1.05 | ( 0.99 - 1.11 ) | 9.35.E-02 | 0.66                                            | 1.09 | ( 1.05 - 1.12 ) | 1.80.E-06 | ++                             | 2.25.E-01              |
| C2CD4A/B       | Japanese       | rs7163757   | C       | T        | 0.56                                           | 1.09 | ( 1.06 - 1.13 ) | 3.84.E-08 | 0.59                                            | 1.06 | ( 1.02 - 1.10 ) | 1.30.E-03 | ++                             | 2.43.E-01              |
| CDKN2A/B       | European       | rs10811661  | T       | C        | 0.54                                           | 1.22 | ( 1.18 - 1.26 ) | 2.86.E-31 | 0.80                                            | 1.18 | ( 1.13 - 1.23 ) | 1.50.E-13 | ++                             | 2.54.E-01              |
| AP3S2          | South Asian    | rs2028299   | C       | A        | 0.20                                           | 1.07 | ( 1.04 - 1.11 ) | 1.14.E-04 | 0.26                                            | 1.04 | ( 1.00 - 1.09 ) | 3.50.E-02 | ++                             | 2.71.E-01              |
| KLHDC5         | European       | rs10842994  | C       | T        | 0.80                                           | 1.06 | ( 1.01 - 1.10 ) | 1.01.E-02 | 0.78                                            | 1.09 | ( 1.04 - 1.13 ) | 1.50.E-04 | ++                             | 2.73.E-01              |
| PTPRD          | Chinese        | rs17584499  | T       | C        | 0.14                                           | 0.97 | ( 0.93 - 1.01 ) | 1.16.E-01 | 0.20                                            | 1.00 | ( 0.95 - 1.06 ) | 9.40.E-01 | -0                             | 3.33.E-01              |
| GPM1           | Japanese       | rs11787792* | A       | G        | 0.90                                           | 1.14 | ( 1.09 - 1.20 ) | 2.21.E-08 | 0.61                                            | 1.10 | ( 1.03 - 1.18 ) | 3.60.E-03 | ++                             | 3.53.E-01              |
| MCA4           | European       | rs12970134  | A       | G        | 0.21                                           | 1.05 | ( 1.01 - 1.10 ) | 1.20.E-02 | 0.29                                            | 1.08 | ( 1.04 - 1.12 ) | 1.10.E-04 | ++                             | 3.82.E-01              |
| HNF1B (TCF2)   | European       | rs4430796   | G       | A        | 0.36                                           | 1.10 | ( 1.07 - 1.14 ) | 1.17.E-09 | 0.48                                            | 1.13 | ( 1.07 - 1.19 ) | 2.40.E-06 | ++                             | 4.17.E-01              |
| PSMD6          | East Asian     | rs831571    | C       | T        | 0.70                                           | 1.05 | ( 1.02 - 1.09 ) | 1.46.E-03 | 0.76                                            | 1.03 | ( 0.99 - 1.08 ) | 1.60.E-01 | ++                             | 4.22.E-01              |
| FTO            | European       | rs9936385   | C       | T        | 0.17                                           | 1.15 | ( 1.11 - 1.20 ) | 1.57.E-14 | 0.44                                            | 1.13 | ( 1.09 - 1.18 ) | 4.70.E-11 | ++                             | 4.32.E-01              |
| TLE4           | European       | rs17791513  | A       | G        | 0.93                                           | 1.16 | ( 1.09 - 1.25 ) | 1.12.E-05 | 0.93                                            | 1.21 | ( 1.13 - 1.30 ) | 1.00.E-07 | ++                             | 4.39.E-01              |
| GIPR           | East Asian     | rs8108269   | G       | T        | 0.62                                           | 1.08 | ( 1.05 - 1.12 ) | 8.43.E-07 | 0.24                                            | 1.06 | ( 1.02 - 1.11 ) | 3.10.E-03 | ++                             | 4.55.E-01              |
| HMG20A         | South Asian    | rs7178572   | G       | A        | 0.46                                           | 1.06 | ( 1.03 - 1.10 ) | 1.76.E-04 | 0.69                                            | 1.08 | ( 1.04 - 1.12 ) | 1.00.E-04 | ++                             | 4.83.E-01              |
| CENPD          | European       | rs11063069  | G       | A        | 0.01                                           | 1.05 | ( 0.93 - 1.19 ) | 4.44.E-01 | 0.21                                            | 1.10 | ( 1.05 - 1.15 ) | 1.50.E-04 | ++                             | 4.85.E-01              |
| NOTCH2         | European       | rs10923931  | T       | G        | 0.04                                           | 1.06 | ( 0.94 - 1.19 ) | 3.18.E-01 | 0.08                                            | 1.10 | ( 1.05 - 1.16 ) | 3.10.E-04 | ++                             | 5.71.E-01              |
| PPARG          | European       | rs1801282   | C       | G        | 0.97                                           | 1.19 | ( 1.09 - 1.30 ) | 8.76.E-05 | 0.90                                            | 1.16 | ( 1.11 - 1.22 ) | 5.00.E-09 | ++                             | 5.74.E-01              |
| SPRY2          | Chinese        | rs1359790   | G       | A        | 0.74                                           | 1.09 | ( 1.05 - 1.12 ) | 3.59.E-06 | 0.73                                            | 1.10 | ( 1.06 - 1.14 ) | 9.20.E-07 | ++                             | 5.96.E-01              |
| CDKAL1         | European       | rs7756992   | G       | A        | 0.47                                           | 1.18 | ( 1.15 - 1.22 ) | 6.81.E-29 | 0.28                                            | 1.20 | ( 1.16 - 1.25 ) | 1.30.E-22 | ++                             | 5.97.E-01              |
| TCF7L2         | European       | rs7903146   | T       | C        | 0.03                                           | 1.43 | ( 1.33 - 1.53 ) | 3.54.E-23 | 0.31                                            | 1.40 | ( 1.35 - 1.46 ) | 5.50.E-65 | ++                             | 6.22.E-01              |
| CDC123/CAMK1D  | European       | rs12779790  | G       | A        | 0.12                                           | 1.10 | ( 1.05 - 1.15 ) | 8.81.E-05 | 0.24                                            | 1.08 | ( 1.03 - 1.13 ) | 1.20.E-03 | ++                             | 6.62.E-01              |
| POU5F1-TCF19   | Trans ethnic   | rs115164593 | G       | A        | 0.54                                           | 1.08 | ( 1.04 - 1.12 ) | 1.15.E-04 | 0.75                                            | 1.09 | ( 1.05 - 1.13 ) | 2.00.E-05 | ++                             | 6.77.E-01              |
| ARL15          | Trans ethnic   | rs702634    | A       | G        | 0.87                                           | 1.07 | ( 1.02 - 1.11 ) | 2.02.E-03 | 0.71                                            | 1.08 | ( 1.04 - 1.12 ) | 1.80.E-05 | ++                             | 6.87.E-01              |
| GRK5           | Chinese        | rs10886471  | C       | T        | 0.73                                           | 1.00 | ( 0.97 - 1.03 ) | 9.88.E-01 | 0.46                                            | 0.99 | ( 0.95 - 1.03 ) | 5.90.E-01 | --                             | 7.18.E-01              |
| STG6A1         | South Asian    | rs16861329  | C       | T        | 0.78                                           | 1.04 | ( 1.00 - 1.08 ) | 3.40.E-02 | 0.87                                            | 1.03 | ( 0.97 - 1.09 ) | 3.90.E-01 | ++                             | 7.43.E-01              |
| ZMIZ1          | European       | rs12571751  | A       | G        | 0.57                                           | 1.08 | ( 1.05 - 1.12 ) | 3.81.E-07 | 0.54                                            | 1.09 | ( 1.06 - 1.13 ) | 1.80.E-07 | ++                             | 7.50.E-01              |
| TLE1           | European       | rs2796441   | G       | A        | 0.36                                           | 1.08 | ( 1.04 - 1.11 ) | 4.00.E-06 | 0.60                                            | 1.07 | ( 1.03 - 1.12 ) | 2.50.E-04 | ++                             | 7.85.E-01              |
| KCNQ1 int11    | European       | rs231361    | A       | G        | 0.83                                           | 1.09 | ( 1.05 - 1.14 ) | 5.83.E-05 | 0.25                                            | 1.10 | ( 1.05 - 1.15 ) | 2.80.E-05 | ++                             | 7.85.E-01              |
| VPS26A         | South Asian    | rs1802295   | T       | C        | 0.12                                           | 1.01 | ( 0.96 - 1.06 ) | 6.24.E-01 | 0.34                                            | 1.02 | ( 0.98 - 1.06 ) | 2.80.E-01 | ++                             | 8.15.E-01              |
| GLIS3          | East Asian     | rs7041847   | A       | G        | 0.52                                           | 1.05 | ( 1.01 - 1.08 ) | 3.69.E-03 | 0.56                                            | 1.05 | ( 1.01 - 1.09 ) | 9.90.E-03 | ++                             | 8.49.E-01              |
| MAEA           | East Asian     | rs6815464*  | C       | G        | 0.64                                           | 1.11 | ( 1.07 - 1.15 ) | 4.93.E-10 | 0.99                                            | 1.12 | ( 1.01 - 1.24 ) | 3.30.E-02 | ++                             | 8.55.E-01              |
| HHEX/IDE       | European       | rs1111875   | C       | T        | 0.33                                           | 1.15 | ( 1.11 - 1.18 ) | 2.39.E-16 | 0.58                                            | 1.15 | ( 1.11 - 1.18 ) | 1.10.E-15 | ++                             | 8.75.E-01              |
| SRR            | Chinese        | rs391300    | G       | A        | 0.78                                           | 1.00 | ( 0.97 - 1.04 ) | 8.18.E-01 | 0.66                                            | 1.00 | ( 0.96 - 1.04 ) | 9.50.E-01 | +0                             | 8.78.E-01              |
| HNF4A          | South Asian    | rs48128     |         |          |                                                |      |                 |           |                                                 |      |                 |           |                                |                        |

Supplementary Table 26.12 loci categorised as Group 2 or 3 in systematic comparison of the effect sizes between Japanese and Europeans

| original study<br>(population) | Lead SNPs<br><i>Locus</i> | Japanese #<br>European ## |                 |                 |                 | Cochran's Q<br>p-value <sup>§</sup> | SNPs in LD | $r^2$ (JPT)<br>$r^2$ (CEU) |      | Japanese #<br>European ## |                 |                  |                  | Cochran's Q<br>p-value <sup>§</sup> | Group** |
|--------------------------------|---------------------------|---------------------------|-----------------|-----------------|-----------------|-------------------------------------|------------|----------------------------|------|---------------------------|-----------------|------------------|------------------|-------------------------------------|---------|
|                                |                           | RAF                       | OR              | 95%CI           | p-value         |                                     |            | RAF                        | OR   | 95%CI                     | p-value         |                  |                  |                                     |         |
| European                       | rs7955901                 | 0.72                      | 0.98            | ( 0.95 - 1.01 ) | 2.55.E-01       | <b>2.40.E-05</b>                    | rs7132840  | 0.27                       | 0.89 | 1.03                      | ( 0.99 - 1.08 ) | 1.77.E-01        | 1.13.E-01        | 2                                   |         |
|                                | <i>TSPAN8/LGR5</i>        | 0.40                      | 1.09            | ( 1.05 - 1.13 ) | 3.20.E-06       |                                     |            | 0.83                       | 0.44 | 1.08                      | ( 1.05 - 1.12 ) | 1.30.E-05        |                  |                                     |         |
|                                | rs7202877                 | 0.79                      | 0.99            | ( 0.95 - 1.03 ) | 5.68.E-01       | <b>3.39.E-05</b>                    | rs13337397 | 0.24                       | 0.64 | 1.02                      | 0.99            | 1.05             | 2.57.E-01        | 2.19.E-03                           | 2       |
|                                | <i>BCAR1</i>              | 0.90                      | 1.15            | ( 1.08 - 1.22 ) | 2.30.E-05       |                                     |            | 0.94                       | 0.91 | 1.15                      | 1.07            | 1.23             | 7.60.E-05        |                                     |         |
|                                | rs10203174                | 0.99                      |                 | N/A             |                 |                                     | No         |                            |      |                           |                 |                  |                  |                                     | 3       |
|                                | <i>THADA</i>              | 0.88                      | 1.15            | ( 1.08 - 1.21 ) | 1.50.E-06       |                                     |            |                            |      |                           |                 |                  |                  |                                     |         |
|                                | rs11717195                | 1.00                      |                 | N/A             |                 |                                     | rs11707746 | N/A                        | 0.95 | 1.05                      | ( 0.98 - 1.13 ) | 1.56.E-01        | 2.98.E-01        | 2                                   |         |
| <i>ADCY5</i>                   | 0.78                      | 1.09                      | ( 1.05 - 1.14 ) | 9.70.E-06       |                 |                                     | 0.84       | 0.76                       | *    | 1.10                      | ( 1.06 - 1.15 ) | 4.30.E-06        |                  |                                     |         |
| rs849135                       | 1.00                      |                           | N/A             |                 |                 | rs849134                            | N/A        | 0.81                       | 1.04 | ( 1.003 - 1.08 )          | 3.27.E-02       | 5.87.E-03        | 2                |                                     |         |
| <i>JAZF1</i>                   | 0.51                      | 1.12                      | ( 1.08 - 1.16 ) | 3.40.E-10       |                 |                                     | 1.00       | 0.51                       | 1.12 | ( 1.08 - 1.16 )           | 3.20.E-10       |                  |                  |                                     |         |
| rs12427353                     | 1.00                      |                           | N/A             |                 |                 | No                                  |            |                            |      |                           |                 |                  |                  | 3                                   |         |
| <i>HNF1A (TCF1)</i>            | 0.84                      | 1.12                      | ( 1.07 - 1.17 ) | 1.00.E-06       |                 |                                     |            |                            |      |                           |                 |                  |                  |                                     |         |
| Japanese                       | rs4731420                 | 0.09                      | 1.16            | ( 1.10 - 1.22 ) | 7.90.E-08       | <b>1.14.E-05</b>                    | rs791597   | 1.00                       | 0.09 | 1.16                      | ( 1.10 - 1.22 ) | 1.23.E-07        | <b>2.60.E-04</b> | 3                                   |         |
|                                | <i>MIR129-LEP</i>         | 0.17                      | 0.99            | ( 0.95 - 1.04 ) | 7.60.E-01       |                                     |            | 0.71                       | 0.23 | *                         | 1.01            | ( 0.96 - 1.06 )  | 6.90.E-01        |                                     |         |
|                                | rs1116357                 | 0.28                      | 1.11            | ( 1.07 - 1.15 ) | 6.88.E-10       | <b>1.09.E-04</b>                    | No         |                            |      |                           |                 |                  |                  | 3                                   |         |
|                                | <i>CCDC85A</i>            | 0.57                      | 1.01            | ( 0.98 - 1.05 ) | 4.70.E-01       |                                     |            |                            |      |                           |                 |                  |                  |                                     |         |
|                                | rs9309245                 | 0.17                      | 1.12            | ( 1.08 - 1.17 ) | 3.23.E-08       | <b>1.33.E-04</b>                    | rs2113821  | 0.80                       | 0.17 | 1.12                      | ( 1.07 - 1.17 ) | 2.61.E-07        | 3.98.E-02        | 2                                   |         |
|                                | <i>ASB3</i>               | 0.37                      | *               | 1.01            | ( 0.98 - 1.05 ) | 5.00.E-01                           |            | 0.17                       | 0.09 | 1.03                      | ( 0.96 - 1.10 ) | 4.50.E-01        |                  |                                     |         |
|                                | rs7107784                 | 0.08                      | 1.17            | ( 1.10 - 1.24 ) | 5.78.E-08       | <b>3.71.E-04</b>                    | rs11564705 | 0.93                       | 0.07 | 1.16                      | ( 1.09 - 1.22 ) | 2.92.E-07        | 1.80.E-02        | 2                                   |         |
| <i>MIR4686</i>                 | 0.31                      | *                         | 1.02            | ( 0.97 - 1.07 ) | 3.90.E-01       |                                     | 0.76       | 0.26                       | 1.05 | ( 0.99 - 1.11 )           | 7.90.E-02       |                  |                  |                                     |         |
| rs75418188 <sup>※</sup>        | 0.07                      | 1.20                      | ( 1.13 - 1.27 ) | 7.89.E-11       |                 | rs35489850                          | 1.00       | 0.07                       | 1.20 | ( 1.13 - 1.27 )           | 2.68.E-10       | <b>3.91.E-08</b> | 3                |                                     |         |
| <i>SLC16A13</i>                | 0.005                     |                           | N/A             |                 |                 |                                     | N/A        | 0.21                       | *    | 0.98                      | ( 0.94 - 1.03 ) | 4.80.E-01        |                  |                                     |         |
| rs147538848                    | 0.23                      | 1.11                      | ( 1.07 - 1.16 ) | 1.88.E-07       |                 | No                                  |            |                            |      |                           |                 |                  |                  | 3                                   |         |
| <i>FAM60A</i>                  | 0.00                      |                           | N/A             |                 |                 |                                     |            |                            |      |                           |                 |                  |                  |                                     |         |

RAF; risk allele frequency (1000 genomes project phase 3 JPT, CEU), OR; odds ratio, 95%CI; 95% confidence interval

\*Best proxy SNPs used in European populations

rs11707746-C; rs11708067-G ( $r^2 = 0.891$ , CEU)

rs791597-A; rs791595-A ( $r^2 = 0.705$ , CEU)

rs35489850-C; rs8078000-A ( $r^2 = 0.91$ , CEU)

rs67156297-A; rs12025518-C ( $r^2 = 1$ , CEU)

rs7107784-G; rs7111341-T ( $r^2 = 0.84$ , CEU)

\*\* see Supplementary Figure 8

# Stage-1 sample in the present Japanese study; 14,463 cases and 26,183 controls

## Publicly available GWAS data (DIAGRAM3); 12,171 cases and 56,862 controls

§ significant  $P < 0.0071 = 0.05/7$

※ rs312457 ( $r^2 = 0.82$ , JPT,  $r^2 = 0.96$ , MXL) in *SLC16A13* is also present in Mexican and associated to T2D ( $P = 8.85 \times 10^{-11}$ ), The SIGMA Type 2 Diabetes Consortium Nature 506 2014.

Supplementary Table27. Systematic evaluation for effect sizes and LD in 7 novel loci

| SNP         | Heterogeneity * |                  |     | SNPs in LD |             |             | Group #         |
|-------------|-----------------|------------------|-----|------------|-------------|-------------|-----------------|
|             |                 |                  |     | **         | ***         | $r^2$       |                 |
| rs1116357   | East Asian      | 1.21.E-02        | No  | No         |             |             | 1               |
|             | European        | <b>2.56.E-04</b> | Yes |            |             |             | 3               |
|             | South Asian     | <b>1.80.E-03</b> | Yes |            |             |             | 3               |
|             | Mexican         | <b>3.30.E-03</b> | Yes |            |             |             | 3               |
| rs147538848 | East Asian      | 7.38.E-01        | No  | No         |             |             | 1               |
|             | European        | N/A              | N/A |            |             |             | 3               |
|             | South Asian     | 4.49.E-01        | No  |            |             |             | 1               |
|             | Mexican         | 5.39.E-01        | No  |            |             |             | 1               |
| rs1575972   | East Asian      | 4.21.E-01        | No  |            |             |             | 1               |
|             | European        | 2.85.E-01        | No  |            |             |             | 1               |
|             | South Asian     | 3.24.E-01        | No  |            |             |             | 1               |
|             | Mexican         | 9.01.E-02        | No  |            |             |             | 1               |
| rs9309245   | East Asian      | 4.82.E-02        | No  | rs2113821  | 0.802 (JPT) | 0.168 (CEU) | 1               |
|             | European        | <b>2.51.E-04</b> | Yes |            |             |             | 2 <sup>##</sup> |
|             | South Asian     | <b>9.03.E-05</b> | Yes |            |             |             | N/A             |
|             | Mexican         | <b>5.28.E-04</b> | Yes |            |             |             | N/A             |
| rs67156297  | East Asian      | 5.59.E-02        | No  | No         |             |             | 1               |
|             | European        | <b>2.88.E-03</b> | Yes |            |             |             | 3               |
|             | South Asian     | <b>1.14.E-05</b> | Yes |            |             |             | 3               |
|             | Mexican         | 3.18.E-01        | No  |            |             |             | 1               |
| rs7107784   | East Asian      | 1.40.E-02        | No  | rs11564705 | 0.933 (JPT) | 0.761 (CEU) | 1               |
|             | European        | <b>5.79.E-04</b> | Yes |            |             |             | 2 <sup>##</sup> |
|             | South Asian     | 1.85.E-01        | No  |            |             |             | 1               |
|             | Mexican         | 9.92.E-01        | No  |            |             |             | 1               |
| rs67839313  | East Asian      | 8.33.E-01        | No  |            |             |             | 1               |
|             | European        | 1.43.E-02        | No  |            |             |             | 1               |
|             | South Asian     | 5.37.E-02        | No  |            |             |             | 1               |
|             | Mexican         | 5.02.E-01        | No  |            |             |             | 1               |

\* Heterogeneity of the effect size between Japanese (Stage-1+Stage-2) and each populations (replicaition set in the present study) significant  $P < 0.0071 = 0.05/7$

\*\* SNPs in LD ( $r^2 \geq 0.8$ ) in Japanese whereas not in LD ( $r^2 < 0.8$ ) or in the other population(s)

\*\*\* SNPs in LD ( $r^2 \geq 0.8$ ) in Japanese and not monoallelic in European

# please note supplementary Figure 8 for the definition

## please note supplementary Table 30

## Supplementary Notes

### The SIGMA (Slim Initiative in Genomic Medicine for the Americas) Type 2 Diabetes Genetics Consortium

Amy L. Williams<sup>1,2</sup>, Suzanne B. R. Jacobs<sup>1</sup>, Hortensia Moreno-Macías<sup>3</sup>, Alicia Huerta-Chagoya<sup>4,5</sup>, Claire Churchouse<sup>1</sup>, Carla Márquez-Luna<sup>6</sup>, Humberto García-Ortíz<sup>6</sup>, María José Gómez-Vázquez<sup>4,7</sup>, Stephan Ripke<sup>1,8</sup>, Alisa K. Manning<sup>1</sup>, Benjamin Neale<sup>1,8</sup>, David Reich<sup>1,2</sup>, Daniel O. Stram<sup>9</sup>, Juan Carlos Fernández-López<sup>6</sup>, Sandra Romero-Hidalgo<sup>6</sup>, Nick Patterson<sup>1</sup>, Suzanne B. R. Jacobs<sup>1</sup>, Claire Churchouse<sup>1</sup>, Shuba Gopal<sup>10</sup>, James A. Grammatikos<sup>10</sup>, Ian C. Smith<sup>11</sup>, Kevin H. Bullock<sup>10</sup>, Amy A. Deik<sup>10</sup>, Amanda L. Souza<sup>10</sup>, Kerry A. Pierce<sup>10</sup>, Clary B. Clish<sup>10</sup>, Irma Aguilar-Delfín<sup>6</sup>, Angélica Martínez-Hernández<sup>6</sup>, Federico Centeno-Cruz<sup>6</sup>, Elvia Mendoza-Caamal<sup>6</sup>, Cristina Revilla-Monsalve<sup>12</sup>, Sergio Islas-Andrade<sup>12</sup>, Emilio Córdova<sup>6</sup>, Eunice Rodríguez-Arellano<sup>13</sup>, Xavier Soberón<sup>6</sup>, María Elena González-Villalpando<sup>22</sup>, Brian E. Henderson<sup>9</sup>, Kristine Monroe<sup>9</sup>, Lynne Wilkens<sup>14</sup>, Laurence N. Kolonel<sup>14</sup>, and Loic Le Marchand<sup>14</sup>, Laura Riba<sup>5</sup>, María Luisa Ordóñez-Sánchez<sup>4</sup>, Rosario Rodríguez-Guillén<sup>4</sup>, Ivette Cruz-Bautista<sup>4</sup>, Maribel Rodríguez-Torres<sup>4</sup>, Linda Liliana Muñoz-Hernández<sup>4</sup>, Tamara Sáenz<sup>4</sup>, Donají Gómez<sup>4</sup>, Ulices Alvirde<sup>4</sup>, Robert C. Onofrio<sup>15</sup>, Wendy M. Brodeur<sup>15</sup>, Diane Gage<sup>15</sup>, Jacquelyn Murphy<sup>1</sup>, Jennifer Franklin<sup>15</sup>, Scott Mahan<sup>15</sup>, Kristin Ardlie<sup>15</sup>, Andrew T. Crenshaw<sup>15</sup>, Wendy Winckler<sup>15</sup>,

Maria L. Cortes<sup>16</sup>, Noël P. Burt<sup>1</sup>, Carlos A. Aguilar-Salinas<sup>4</sup>, Clicerio González-Villalpando<sup>22</sup>, Jose C. Florez<sup>1,17,18</sup>, Lorena Orozco<sup>6</sup>, Christopher A. Haiman<sup>9</sup>, Teresa Tusié-Luna<sup>4,5</sup>, David Altshuler<sup>1,2,17,18,19,20,21</sup>

1 Program in Medical and Population Genetics, Broad Institute of Harvard and MIT, Cambridge, Massachusetts, USA

2 Department of Genetics, Harvard Medical School, Boston, Massachusetts, USA

3 Universidad Autonoma Metropolitana, Mexico City, Mexico

4 Instituto Nacional de Ciencias Médicas y Nutrición Salvador Zubirán, Mexico City, Mexico

5 Instituto de Investigaciones Biomédicas, UNAM. Unidad de Biología Molecular y Medicina Genómica, UNAM/INCMNSZ, Mexico City, Mexico

6 Instituto Nacional de Medicina Genómica, Mexico City, Mexico

7 Universidad Autónoma de Nuevo León, San Nicolás de los Garza, Nuevo León 66451, México

8 Analytic and Translational Genetics Unit, Massachusetts General Hospital, Boston, MA, USA 16 Instituto Mexicano del Seguro Social SXXI, Mexico City, Mexico

9 Department of Preventive Medicine, Keck School of Medicine, University of Southern California, Los Angeles, California,, USA

10 The Metabolite Profiling Platform, The Broad Institute of Harvard and MIT, Cambridge, Massachusetts, USA

11 Cancer Biology Program, The Broad Institute of Harvard and MIT, Cambridge, Massachusetts, USA 24 University of Minnesota, Minneapolis, Minnesota, USA 25

University of California San Francisco, San Francisco, California, USA 26 Duke-National University of Singapore Graduate Medical School, Singapore, Singapore

12 Instituto Mexicano del Seguro Social SXXI, Mexico City, Mexico

13 Instituto de Seguridad y Servicios Sociales para los Trabajadores del Estado, Mexico City, Mexico

- 14 Epidemiology Program, University of Hawaii Cancer Center, Honolulu, Hawaii, USA
- 15 The Genomics Platform, The Broad Institute of Harvard and MIT, Cambridge, Massachusetts, USA
- 16 Broad Institute of Harvard and MIT, Cambridge, Massachusetts, USA
- 17 Center for Human Genetic Research and Diabetes Research Center (Diabetes Unit), Massachusetts General Hospital, Boston, Massachusetts, USA
- 18 Department of Medicine, Harvard Medical School, Boston, Massachusetts, USA
- 19 Center for Human Genetic Research, Massachusetts General Hospital, Boston, Massachusetts, USA
- 20 Department of Molecular Biology, Harvard Medical School, Boston, Massachusetts, USA
- 21 Department of Biology, Massachusetts Institute of Technology, Cambridge, Massachusetts, USA
- 22 Centro de Estudios en Diabetes, Unidad de Investigacion en Diabetes y Riesgo Cardiovascular, Centro de Investigacion en Salud Poblacional, Instituto Nacional de Salud Publica, Mexico City, Mexico

## **Comparison of effect sizes of T2D SNP loci between Japanese and each of other populations**

We have compared the effect sizes in our Japanese GWAS data (14,463 cases and 26,183 controls) and Europeans (DIAGRAM3 12,171 cases and 56,862 controls <http://diagram-consortium.org/downloads.html>) across novel and established T2D lead SNPs in the original reports or their proxies (Supplementary Table 25, Supplementary Figure 7). Out of 90 loci, we successfully obtained the association data of 80 lead SNPs in both populations. Of 80 SNPs examined, 6 SNP loci showed significant heterogeneity (significant p-value =  $0.05/80 = 6 \times 10^{-4}$ ) of the effect between Japanese and Europeans (Supplementary Table 25). Overall there was no systematic difference in effect sizes between Japanese (J) and Europeans (E); effect sizes; J > E 35 SNPs, J < E 45 SNPs, binomial test, p = 0.31, although, as expected, the effect sizes of Japanese GWAS derived loci were greater in the Japanese (binomial test, p =  $5.0 \times 10^{-4}$ ) and vice versa (binomial test, p =  $2.9 \times 10^{-3}$ , Supplementary Figure 7).

Next, we categorized 60 loci (14 Japanese GWAS and 46 out of 47 European GWAS derived loci; the association data for rs35658696 in *PAM* locus was not available in either Japanese GWAS data or DIAGRAM3 data) into 3 groups based on



heterogeneity of the effect sizes for the original lead SNPs or their proxies between the populations and on LD in each population as shown in Supplementary Figure 8.

Group1: There is no significant heterogeneity of the effect size of the lead SNP between Japanese and European (significant p-value =  $0.05/60 = 8 \times 10^{-4}$ ), suggesting it is likely that the causal SNPs are in LD in both of populations or the lead SNP is the causal SNP, Group2: the significant heterogeneity of the effect sizes is observed on lead SNPs, but not on SNPs which are in LD ( $r^2 \geq 0.8$ ) with lead SNPs in the population of original study and not in LD ( $r^2 < 0.8$ ) in the other population; the causal allele is likely to be in LD with the lead SNP in population-specific manner, Group3: The significant heterogeneity of the effect size of lead SNP between Japanese and European is observed. In addition, there is no SNP in LD ( $r^2 \geq 0.8$ ) with lead SNPs in the population of original study and not in LD ( $r^2 < 0.8$ ) in the other population; the effect of causal allele might be restricted to certain populations.

Of 60 loci, the lead SNPs of four European and two Japanese GWAS derived loci were not common (RAF < 0.01) in Japanese or European respectively. Then we searched variants not only in LD ( $r^2 \geq 0.8$ ) with lead SNPs in the population of original studies but also common (RAF  $\geq 0.01$ ) in both of Japanese and Europeans to categorize them into either Group 2 or 3 (Supplementary Figure 8).

As shown in Supplementary Table 25, 26 and Supplementary Figure 8, 49 loci were categorized as Group1 and another 6 loci were categorized as Group3. Remaining 6 loci were categorized as Group 2, suggesting the causal allele of these loci are likely to be in LD with this SNP in population specific manner, however we could not identify potential causal SNPs in these loci which association for T2D were statistically significant in both of Japanese and Europeans (significant p-value =  $0.05/60 = 8 \times 10^{-4}$ )

We also evaluated the heterogeneity of the effect for seven novel loci identified in the present study between Japanese and each of East Asians, Europeans, South Asians and Mexicans (Supplementary Table 27).

## **Method for drug discovery**

### **Prioritization of biological candidate genes from T2D susceptibility loci**

We defined 286 T2D risk genes within the 90 known T2D susceptibility loci, which included SNPs with moderate linkage disequilibrium to the lead SNPs ( $r^2 > 0.5$ ), according to data from 1000 genomes in European populations (1000 genomes CEU phase 2), in the Japanese population (1000 genomes JPT phase 2), in the population of original studies, or that were located within 25 kb of lead SNPs. Biological candidate genes were defined from the 286 T2D risk genes by adopting the following 6 selection criteria and calculating the number of satisfied criteria, as previously described<sup>1</sup>.

#### 1) Missense variant genes (Supplementary Table 17)

If the genes included missense variants, which were in linkage disequilibrium ( $r^2 \geq 0.80$ ) to T2D risk lead SNPs in European, Japanese or population of original studies, they were annotated as missense variant genes.

#### 2) eQTL genes (Supplementary Data 3)

We assessed cis-eQTL effects using 3 eQTL data sets: the study for lymphoblastoid cell lines (LCLs), adipose tissue obtained from 856 European subjects<sup>2</sup> (<https://www.sanger.ac.uk/resources/software/genevar/>), and liver tissues obtained from 427 European subjects(<http://www.ncbi.nlm.nih.gov/projects/gap/eql/index.cgi>)<sup>3</sup>.

If data for the T2D risk lead SNPs were not available in eQTL data sets, we alternatively utilized the results of proxy SNPs in linkage disequilibrium ( $r^2 \geq 0.80$ ) with the highest  $r^2$  value. The significance threshold was defined as  $p < 0.05$ . For liver e-QTL, we searched for 3,694 eQTL SNPs with  $p < 0.004$ , because information of SNPs with  $p$  values  $\geq 0.004$  were not available in the NCBI eQTL database (<http://www.ncbi.nlm.nih.gov/projects/gap/eqtl/index.cgi>).

If gene expression was associated with the T2D risk lead SNPs or their proxy in European, Japanese or population of original studies, they were annotated as eQTL genes.

### 3) Monogenic diabetes genes (Supplementary Table 18)

We identified monogenic diabetes genes by querying PubMed using “monogenic diabetes” and “review” and selected the latest 6 articles that summarized monogenic diabetes<sup>4-9</sup>. If genes were shown to be causal for monogenic diabetes, they were annotated as monogenic diabetes genes.

### 4) Mouse phenotype genes (Supplementary Table 19, Supplementary Data 2)

We acquired knockout mouse phenotype and gene information from the Mouse Genome Informatics (MGI) database 16 on 11 August, 2014 (<http://www.informatics.jax.org/>)<sup>10</sup>. Of 286 T2D candidate genes, 169 mouse orthologs existed in the database. Overlap with the 169 genes implicated in knockout mouse phenotypes was evaluated. Among the 29

categories of phenotypes, we observed 6 categories that were significantly enriched with T2D risk genes ( $p < 0.05/29 = 0.0017$ , Supplementary Table 19). These included homeostasis/metabolism, liver/biliary system, endocrine/exocrine gland, growth/size/body, mortality/aging, and embryogenesis phenotypes. We defined genes for which at least 3 of the associated phenotype labels ( $p < 9.2 \times 10^{-5}$ ) were observed in knockout mouse phenotypes as mouse phenotype genes.

#### 5) PubMed text mining genes (Supplementary Table 20)

We used GRAIL (<https://www.broadinstitute.org/mpg/grail/>)<sup>11</sup> to search for text similarity in PubMed abstracts (connectivity) across the 286 T2D risk genes. To reduce confounding caused by already published T2D GWA analyses, we queried only abstracts that were published prior to December 2006. We entered the 90 T2D regions defined in the previous section ( $\pm 25$  kb or  $r^2 > 0.50$ ) as query regions, and these were set equal to seed regions. Then, genes that were prioritized by PubMed text mining using GRAIL with gene-based  $p < 0.05$  were annotated as PubMed text mining genes.

#### 6) Protein-protein interaction (PPI) network genes (Supplementary Figure 4)

We used DAPPLE (<http://www.broadinstitute.org/mpg/dapple/dappleTMP.php>)<sup>12</sup> to identify genes prioritized by PPI network. We entered 90 T2D regions defined in the previous section ( $\pm 25$  kb or  $r^2 > 0.50$ ) as inputs and defined the cutoff number for Common

Interactor binding degree as 2. We defined the genes with corrected  $p < 0.05$  as PPI network genes.

### **Definition of biological T2D risk genes**

Genes included in the T2D risk loci were scored by adopting the 6 selection criteria and calculating the number of the satisfied criteria (Supplementary Data 4). Since these criteria exhibited weak correlations with each other ( $r^2 < 0.31$ , Supplementary Figure 5), each gene was given a score based on the number of criteria that were met (scores ranged from 0 to 6). Genes with a score of at least 2 were defined as biological T2D risk genes (Figure 3, Supplementary Figure 5).

### **Drug target gene enrichment analysis**

We obtained a list of 871 drug target genes from the previous report by Okada et al<sup>1</sup>. Drug target genes were manually extracted for genes with approved T2D drugs in Japan in June 2014 by searching DrugBank (<http://www.drugbank.ca/>)<sup>13</sup> or Therapeutic Target Database (<http://bidd.nus.edu.sg/group/cjttd/>)<sup>14</sup> (Supplementary Table 22). We also extracted genes in direct PPI with the biological T2D risk genes described above using the InWeb database (<http://www.broadinstitute.org/mpg/dapple/dappleTMP.php>)<sup>12</sup>. An

overlap between the biological T2D risk genes or genes in direct PPI with the biological T2D risk genes and the drug target genes was assessed using a permutation procedure, as previously described in Okada et al<sup>1</sup>(Supplementary Figure 6).

## Supplementary References

1. Okada, Y. *et al.* Genetics of rheumatoid arthritis contributes to biology and drug discovery. *Nature* **20**, 376-381 (2014).
2. Grundberg, E. *et al.* Mapping cis- and trans-regulatory effects across multiple tissues in twins. *Nat. Genet.* **44**, 1084–1089 (2012)
3. Schadt, E.E. *et al.* Mapping the genetic architecture of gene expression in human liver. *PLoS Biol.* **6**, e107. (2008)
4. Schwitzgebel, V.M. Many faces of monogenic diabetes. *J Diabetes Investig.* **5**, 121-133. (2014)
5. Bonnefond, A. *et al.* Highly sensitive diagnosis of 43 monogenic forms of diabetes or obesity through one-step PCR-based enrichment in combination with next-generation sequencing. *Diabetes Care.* **37**, 460-467.(2014)
6. Rubio-Cabezas, O *et al.* Diabetes mellitus in neonates and infants: genetic heterogeneity, clinical approach to diagnosis, and therapeutic options. *Horm. Res. Paediatr.* **80**,137-146. (2013)
7. Parker, V.E. *et al.* Genetics in endocrinology: genetic forms of severe insulin resistance: what endocrinologists should know. *Eur J Endocrinol.* **169**, R71-80. (2013)



8. Klupa, T. *et al.* Monogenic models: what have the single gene disorders taught us? *Curr Diab Rep.* **12**, 659-666. (2012)
9. Semple, R.K. *et al.* Genetic syndromes of severe insulin resistance. *Endocr Rev.* **32**,498-514. (2011)
10. Eppig, J.T. *et al.* The Mouse Genome Database (MGD): comprehensive resource for genetics and genomics of the laboratory mouse. *Nucleic Acids Res* **40**, D881-886 (2012)
11. Raychaudhuri, S. *et al.* Identifying relationships among genomic disease regions: predicting genes at pathogenic SNP associations and rare deletions. *PLoS Genet* **5**, e1000534 (2009)
12. Rossin, E.J. *et al.* Proteins encoded in genomic regions associated with immune-mediated disease physically interact and suggest underlying biology. *PLoS Genet* **7**, e1001273 (2011)
13. Wishart, D.S. *et al.* DrugBank: a comprehensive resource for in silico drug discovery and exploration. *Nucleic Acids Res.* 34:D668-672. (2006)
14. Zhu, F.*et al.* Therapeutic target database update 2012: a resource for facilitating target-oriented drug discovery. *Nucleic Acids Res.* 40: D1128-1136. (2012)
